1  
2  
3  
4  
5  
6  
7  
8  
9  
10  
11  
12  
13  
14  
15  
16  
17  
18  
19  
20

## **Artificial intelligence-enabled event adjudication: estimating delayed cardiovascular effects of respiratory viruses.**

Shinichi Goto<sup>\*,1,2</sup>, Max Homilius<sup>\*,1,2</sup>, Jenine E. John<sup>1,2</sup>, James G. Truslow<sup>1</sup>, Andreas A. Werdich<sup>1,2</sup>, Alexander J. Blood<sup>1,2</sup>, Brian H. Park<sup>1,2</sup>, Calum A. MacRae<sup>1,2</sup> and Rahul C. Deo<sup>†,1,2,3</sup>

<sup>1</sup>One Brave Idea and Division of Cardiovascular Medicine, Department of Medicine, Brigham and Women's Hospital, Boston, MA, USA

<sup>2</sup>Harvard Medical School, Boston, MA, USA

<sup>3</sup>Center for Digital Health Innovation and Department of Medicine, University of California San Francisco, San Francisco, CA, USA

\* contributed equally

† **To whom correspondence should be addressed:**

Rahul C. Deo, MD, PhD

One Brave Idea / Division of Cardiovascular Medicine, Department of Medicine, Brigham and Women's Hospital, Boston, MA, USA

[rdeo@bwh.harvard.edu](mailto:rdeo@bwh.harvard.edu)

## 22 **Abstract**

23

24 Healthcare systems ideally should be able to draw lessons from historical data, including whether  
25 common exposures are associated with adverse clinical outcomes. Unfortunately, structured  
26 clinical data, such as encounter diagnostic codes in electronic health records, suffer from multiple  
27 limitations and biases, limiting effective learning. We hypothesized that a machine learning  
28 approach to automate ascertainment of clinical events and disease history from medical notes  
29 would improve upon using structured data and enable the estimation of real-world risks. We  
30 sought to test this approach to address a timely goal: estimating the delayed risk of adverse  
31 cardiovascular events (i.e. after the index infection) in patients infected with respiratory viruses.  
32 Using 4,151 cardiologist-labeled notes as gold standard, we trained a series of neural network  
33 models to automate event adjudication for heart failure hospitalization, acute coronary syndrome,  
34 stroke, and coronary revascularization and to identify past medical history for heart failure.  
35 Though performance varied by task, in nearly all cases, our models surpassed the use of  
36 structured data in terms of sensitivity for a given specificity level and enabled principled evaluation  
37 of classification thresholds, which is typically impossible to do with diagnostic codes. Deploying  
38 our models on more than 17 million notes for 267,596 patients across an extensive integrated  
39 delivery network, we found that patients infected with respiratory syncytial virus had a 23%  
40 increased risk of delayed heart failure hospitalization over a subsequent 4-year period compared  
41 with propensity-score matched patients who had the same test but with negative results ( $p = 0.003$ ,  
42 log-rank). In contrast, we found no such increased risk in patients with a positive influenza viral  
43 test compared with a negative test (rate ratio 0.98,  $p = 0.71$ ). We conclude that convolutional  
44 neural network-based models enable accurate clinical labeling at scale, thereby unlocking timely  
45 insights from unstructured clinical data.

## 46 **Introduction**

47

48 The elusive goal of a learning healthcare system requires accurate clinical information. Structured  
49 healthcare data, although increasingly accessible, suffers from biases ubiquitous in observational  
50 data, including misclassification bias. In particular, diagnostic codes, widely used for billing and  
51 research, typically have low sensitivity and specificity<sup>1,2</sup>. When used to establish an association  
52 of exposures to a clinical outcome, such limitations can lead to misclassified outcomes and  
53 interfere with adjustment procedures for confounding and selection bias<sup>3</sup>.

54 Nonetheless, the detection of such associations is a priority and often requires analysis of large-  
55 scale real-world data<sup>4</sup>. Furthermore, such observational data is often the only choice for urgent  
56 clinical questions with potential public health implications. One example of such a pressing topic  
57 is the cardiovascular consequences of common respiratory viruses. The immediate adverse  
58 impact of respiratory viruses such as influenza, respiratory syncytial virus (RSV), and most  
59 recently, severe acute respiratory syndrome coronavirus 2 (SARS-CoV-2) is well recognized and  
60 includes acute heart failure<sup>5,6</sup>, myocardial infarction<sup>7,8</sup>, myocarditis<sup>9-11</sup>, and stroke<sup>12</sup>. However, one  
61 unresolved question is whether there is a delayed increased risk in such patients well after the  
62 incident infection.

63 We sought to address these questions, first developing machine learning methods to ascertain  
64 and adjudicate clinical events and past medical history at scale, and then applying these to patient  
65 data across multiple institutions within a large integrated delivery network.

66

## 67 **Results**

68

### 69 ***Building a large compendium of cardiologist-labeled notes***

70 The overview of our approach is shown in **Figure 1**. To train an accurate model for event  
71 adjudication using medical notes, we labeled a large compendium of discharge summaries and  
72 progress notes. A total of 2,967 discharge summaries (1,372 for derivation set, 592 for validation  
73 set and 1,003 for test set) and 1,184 progress notes (588 for derivation set, 231 for validation set  
74 and 365 for test set) were obtained from the Massachusetts General Brigham (MGB) Enterprise  
75 Data Warehouse (EDW) database, which represents multiple institutions across an integrated  
76 delivery network. Each discharge summary was manually annotated by cardiologists following  
77 previously published guidelines for 4 possible diagnoses<sup>13</sup>: acute coronary syndrome (ACS), heart  
78 failure (HF) as the primary cause of hospitalization, percutaneous coronary intervention or  
79 coronary artery bypass graft surgery (PCI/CABG), and ischemic stroke. Progress notes were  
80 labeled according to a 4-class system for heart failure history (see Methods). Discharge  
81 summaries were derived from 17 different institutions while progress notes were from 46 different  
82 institutions with differing levels of specialized care (**Table S1 and S2**). The labeled discharge  
83 summaries were then used to train the event models and the progress notes were used to train  
84 the note-level past-history model (**Figure S1**). Because single notes are not exhaustive in  
85 documenting the past medical history of a patient, we developed a model that integrated the  
86 output from multiple notes to estimate past-history of a specific disease at a given point in time.  
87 To this end, all notes for an additional 863 patients (403 for derivation, 156 for validation and 304  
88 for test) were used to label past history at a given timepoint, and were used in combination with  
89 the note-level past-history model to train a patient level past-history model (**Figure S2**).

### 90 ***Neural network-based models have high accuracy for event adjudication***

91 We trained four event adjudication models based on a neural network architecture using the  
92 labeled discharge summaries as training and testing data (**Figure S3**). The neural network-based  
93 classifiers had excellent accuracy for detecting events with area under the curve of receiver  
94 operating characteristics (AUC-ROC) of 0.97 (95%CI 0.95-0.98) for heart failure hospitalization,  
95 1.0 (0.99-1.00) for PCI/CABG, 0.97 (0.95-0.98) for ACS and 0.98 (0.97-0.99) for ischemic stroke  
96 (**Figure 2**). In comparison, structured diagnostic data (ICD-10 codes for ACS/HF/IS and Current  
97 Procedural Terminology (CPT) codes for PCI/CABG) had excellent specificity but only modest  
98 sensitivity with the exception of ischemic stroke, for which diagnostic codes had excellent

99 sensitivity for the notes we examined (**Table 1**). The good performance of the ICD-10 codes for  
100 stroke may be attributable to the fact that most of the stroke cases we considered were admitted  
101 to neurology intensive care units, which may not be the case at other institutions/settings. Overall,  
102 our models were able to provide increased sensitivity at a 90% specificity threshold for events  
103 (**Table 2**). Based on these results, we predicted events based on our event adjudication models  
104 for HF hospitalization, PCI/CABG and ACS and used ICD-10 codes to define ischemic stroke  
105 events.

106

107 ***Patients positive for respiratory syncytial virus infection have a higher risk***  
108 ***of subsequent heart failure hospitalization compared with those with***  
109 ***negative results***

110 A scalable method of accurate event adjudication enables a breadth of downstream applications  
111 of clinical and economic value to hospital systems and public health measures. We focused on a  
112 timely area, the association of respiratory virus infection with remote cardiovascular events. Using  
113 data from the MGB EDW, we identified 267,596 patients with diagnostic test results for a  
114 respiratory virus. Of these, we first focused on the 57,828 patients with respiratory syncytial virus  
115 (RSV) diagnostic test results, out of which 35,056, 35,828 and 35,778 patients were included in  
116 the final cohort for predicting heart failure hospitalization, urgent revascularization and ischemic  
117 stroke analysis respectively (**Figure S4-S6**).

118 By selecting patients based on having undergone a viral test, we introduced possible selection  
119 (collider) bias<sup>14</sup>, given that clinical suspicion for a respiratory virus implies an increased likelihood  
120 of a cardiopulmonary etiology (**Figure S7**). We thus used propensity-score matching to identify  
121 patients with a negative test result but with a similar probability of having a positive result for viral  
122 infection, as judged by values of other clinical (confounding) variables<sup>15</sup>. Propensity-score  
123 matching with 1:16 ratio resulted in well-balanced baseline characteristics between RSV positive  
124 and negative patients for all 3 outcomes (standardized mean difference <0.1 for all characteristics,  
125 **Tables S3-S8**). To focus on delayed outcomes rather than acute outcomes, we defined events  
126 as occurring at least 30 days after the test result was obtained (and matched patients by  
127 comorbidities up to that point). RSV positive patients had an event rate of 10.5/100 person-years  
128 of heart failure hospitalization which was significantly higher compared to those with negative  
129 results who had an event rate of 8.6/100 person-years (n=26,027, median follow-up 368 days, p  
130 = 0.0032, **Figure 3 upper panel**). There was no significant difference between RSV positive

131 patients and negative patients for urgent revascularization, defined as the conjunction of a  
132 diagnosis of acute coronary syndrome and either PCI or CABG (n=26,724, median follow-up 388  
133 days, 0.8/100 person-years for test positive patients and 0.7/100 person-years for test negative  
134 patients, p = 0.49) and ischemic stroke (n=26,690, median follow-up 389 days, 1.1/100 person-  
135 years for test positive and 0.9/100 person-years for test negative, p = 0.46). To evaluate if this  
136 analysis was driven mostly by early events, we restricted events to those occurring at least 90  
137 days after the test result (patient selection and baseline characteristics shown in **Figures S8-S10**  
138 and **Tables S9-14**). This sensitivity analysis showed similar results with a longer median follow-  
139 up period of 418, 444 and 442 days for heart failure hospitalization, urgent revascularization and  
140 ischemic stroke, respectively, suggesting that our results are driven by delayed events rather than  
141 acute events (**Figure S11 upper panel**).

142 ***Patients positive for influenza virus infection do not have an increased risk***  
143 ***of delayed cardiovascular events compared to those with negative results***

144 We identified 81,250 patients with influenza test results, of which 58,522, 59,594 and 59,523  
145 patients were included in the final cohort for heart failure hospitalization, urgent revascularization,  
146 and ischemic stroke, respectively (**Figure S12-S14**). As for RSV, we used propensity-score  
147 matching to adjust for differences in baseline characteristics between the virus positive and  
148 negative population. This matching procedure resulted in 1:5 matching between influenza positive  
149 and negative patients for all 3 outcomes (standardized mean difference <0.1, **Tables S15-S20**).  
150 In contrast to the RSV virus, there were no significant differences between influenza positive  
151 patients and negative patients for delayed heart failure hospitalization (n=30,828, median follow-  
152 up 614 days, 2.8/100 person-years for test positive and 2.9/100 person-years for test negative, p  
153 = 0.71), urgent revascularization (n=31,056, median follow-up 643 days, 0.3/100 person-years for  
154 test positive and 0.3/100 person-years for test negative, p = 0.62) or ischemic stroke (n=31,032,  
155 median follow-up 653 days, 0.5/100 person-years for test positive and 0.5/100 person-years for  
156 test negative, p = 0.62, **Figure 3 lower panel**). As with RSV, we also performed an analysis by  
157 using 90 days as the early event exclusion period (patient selection and baselines shown in  
158 **Figures S15-S17** and **Tables 21-26**). The results were similar to the main analysis with median  
159 follow up period of 670, 682 and 653 days for heart failure hospitalization, urgent revascularization  
160 and ischemic stroke, respectively (**Figure S11 lower panel**).

161 ***Sensitivity analysis using a neural network-based model for heart failure***  
162 ***history shows robustness of results***

163 The past medical history of heart failure used for propensity-score matching was derived from an  
164 aggregate use of ICD-10 codes from problem lists, encounter diagnoses, medical history, and  
165 admission diagnoses. Given concern for inaccuracy of structured data, our finding that RSV  
166 infection was associated with higher rate of heart failure hospitalization may have been affected  
167 by the definition of HF history (which has large impact on this outcome). To overcome this concern,  
168 we first sought to evaluate the accuracy of the ICD-10 code-based approach to define HF history.  
169 To this end, we performed a systematic effort of labeling 863 patients and found that the ICD-10  
170 approach nonetheless had a good accuracy with sensitivity 0.80 and specificity 0.97 (**Figure 4A**).  
171 Although the performance was good, the use of structured data typically leaves no flexibility to  
172 explore robustness of the result to different thresholds. We were particularly concerned about the  
173 impact of a reduced sensitivity. Therefore, we developed a neural network-based approach for  
174 learning past medical history at a given point in time using a neural network-based strategy. We  
175 trained three separate models: a model for note-informativeness, a model for heart failure history  
176 classification, and finally a time series model that used an aggregate of note scores across time.  
177 The final model had an excellent discriminative ability with ROC-AUC of 0.97 (**Figure 4A**).  
178 Although the accuracy at the mandatory point of comparison was not superior to the ICD-10 code-  
179 based definition, the model enabled evaluating robustness of the results to the selected cutoff  
180 point. We assessed conclusions using cutoffs with high sensitivity, high specificity and a balanced  
181 sensitivity/specificity ratio. Different cutoffs gave different absolute rates of heart failure history  
182 (**Table S26**). Nonetheless, propensity score matching using model-based heart failure history was  
183 successful with SMD<0.1 for all baseline values (**Table S27-32**) and the overall results were  
184 unchanged for the association of heart failure hospitalization with viral infection, with p-values  
185 ranging from 0.0030 to 0.0043 for RSV and 0.28 to 0.70 for influenza (**Figure 4B**).

186

187

## 188 Discussion

189

190 Here we outline two primary contributions; 1) machine learning models for automated event  
191 adjudication for cardiovascular events and past medical history and 2) application of these models  
192 to estimate the risk of delayed heart failure hospitalizations in individuals with respiratory virus  
193 infections. In this context, we observed an estimated 23% higher risk of delayed heart failure  
194 hospitalizations in individuals infected with RSV compared to those who tested negative but no  
195 change in the risk for such events following influenza infection.

196 Our work labeling a large collection of notes across over 17 institutions within an integrated  
197 delivery network adds further support to the limitations of diagnostic codes for describing  
198 cardiovascular events<sup>2</sup>. The accuracy of diagnostic codes varied strongly with the type of event:  
199 at one extreme, ischemic stroke was very well captured whereas there were no clear diagnostic  
200 codes for coronary revascularization, and, at least within our database, the use of CPT codes had  
201 very low sensitivity. Reimbursement incentives are known to shape the completeness of  
202 diagnostic codes<sup>16</sup> and there is also further variation from center to center based on provider and  
203 institutional coding practices. Nonetheless, a systematic labeling approach can provide local  
204 estimates of the adequacy of diagnostic code for any specific application, and further simulation-  
205 based modeling can be used to understand the impact of misclassification bias on any  
206 downstream uses of the data.

207 Although we found that a historical compilation encompassing encounter diagnoses, admission  
208 diagnoses, problem lists, and medical history is highly accurate, at least for heart failure, the  
209 sensitivity was relatively low compared to specificity, which is in agreement with previous studies  
210 showing that ICD-10 codes for past medical history suffers primarily from problems of sensitivity<sup>17</sup>.  
211 The ICD-10 code-based approach forces a single sensitivity/specificity and does not allow  
212 adjustment or optimization. In comparison, our model-based definition can provide various  
213 sensitivity/specificity ratio by adjusting the threshold. This feature enabled us to perform a  
214 sensitivity analysis showing that our results are robust to the sensitivity/specificity of the past  
215 medical history detection. Furthermore, we anticipate that our approach should generalize well to  
216 capturing conditions for which there are no diagnostic codes (such as inadequate response to a  
217 medication).

218 In terms of prior work, most of the focus on EHR-based automated diagnoses has been on the  
219 use of heuristic combinations of diagnostic codes, medications, labs, and regular expression



220 matching within unstructured data<sup>2</sup>. Recent advances in convolutional neural network-based text  
221 processing have motivated their application to the problem of note classification<sup>18,19</sup>. Our own  
222 experience with this process emphasized the need for both domain (i.e., cardiovascular disease)  
223 and data science expertise, with an iterative examination of failure cases, augmented labeling,  
224 and retraining of models.

225 Our models enabled scalable analysis of millions of discharge summaries and progress notes.  
226 We see multiple applications of such an approach, whether it be for pharmacovigilance, quality  
227 control, or patient selection for a clinical trial according to criteria that may be poorly reflected in  
228 structured data. For our specific application, we were able to conclude that influenza virus  
229 infection does not appear to contribute to any delayed increase in heart failure hospitalization,  
230 while RSV infection contributes a 23% increase in risk that is apparent across an entire four-year  
231 period.

232 Prior work focusing on respiratory viruses have emphasized the acute cardiovascular  
233 manifestations of viral infections in a limited subset of patients<sup>5,20</sup>. In the case of RSV, it is well  
234 recognized that patients with RSV infections have a higher burden of cardiovascular disease,  
235 although this may reflect selection bias, given that cardiovascular consequences of viral infection  
236 may add to pre-existing disease to drive presentation to healthcare systems. However, our results  
237 are striking in that even controlling for heart failure diagnoses prior to and up to 90 days after the  
238 incident event, we still see an increased risk of future events. While previous reports show  
239 increased risk of cardiovascular events in patients with influenza infections, they focus entirely on  
240 acute events in the context of the infection<sup>6-8</sup>. Our analysis excludes acute events and thus, does  
241 not contradict these findings. It is entirely plausible that influenza virus increases heart failure  
242 hospitalization in the acute phase, either through direct myocardial involvement<sup>21</sup> or indirectly  
243 through a systemic inflammatory response as with many other infections<sup>22</sup>, but patients may not  
244 have prolonged damage to the heart.

245 The primary limitation of our work is the unknown contribution of unmeasured confounders with  
246 significant impact on both heart failure hospitalization outcomes and probability of positive test for  
247 viral infection. Since our analysis focused only on those who had been tested for the virus, these  
248 population likely had symptoms suggestive of a cardiopulmonary illness. Thus, the negative  
249 results for the virus results may be consistent with other reasons for having respiratory symptoms.  
250 In the case of influenza virus, we observed a classic example of collider bias requiring propensity  
251 score matching approaches<sup>23</sup>. Nonetheless, such approaches inevitably can suffer from model  
252 misspecification. However, it should be noted that possible approaches to address these

253 limitations such as randomizing patients to be infected by a virus or performing a cohort study  
254 testing every individual regardless of the symptoms are not feasible.

255 An open question is whether our work has relevance to other respiratory viruses, such as SARS-  
256 COV2. Although SARS-COV2, like influenza<sup>21</sup> and RSV, can cause myocarditis<sup>9-11,24</sup>, there is no  
257 clarity on the prevalence of this effect given the selection bias in published reports. Nonetheless,  
258 it is reasonable to assume the possibility of long-term cardiac consequences for SARS-COV2,  
259 that will only be addressed with multi-year surveillance and methodologic approaches such as  
260 our own.

261

262

263

264

## 265 **Methods**

266

### 267 ***Ethics statement***

268 Institutional review board approval was obtained for all aspects of this study,

### 269 ***Selection and labeling of clinical notes for event model training and*** 270 ***evaluation***

271 The Massachusetts General Brigham (MGB) Electronic Data Warehouse (EDW), which includes  
272 notes from >20 provider locations across a large integrated delivery network, was the source of  
273 notes and structured clinical data used in this study. Two sets of discharge summaries were used  
274 for model training and testing. The training set, consisting of 1964 discharge summaries, were  
275 partially enriched with the use of ICD10 codes for stroke, myocardial infarction, and heart failure.  
276 The test set, consisting of 1,003 discharge summaries, was selected randomly from patients  
277 above who had undergone electrocardiograms within the centers participating in the EDW.

278 Following previously published guideline<sup>13</sup>, one of 4 cardiologists labeled each discharge  
279 summary for 4 possible diagnoses: acute coronary syndrome, heart failure as the primary cause  
280 of hospitalization, percutaneous coronary intervention or coronary artery bypass surgery  
281 (PCI/CABG), or ischemic stroke.

### 282 ***Processing of clinical notes***

283 We used SpaCy v2.2.4<sup>25</sup> to tokenize medical notes. We extended the English language model  
284 (en-core-web-large) tokenization rules by adding a comprehensive set of abbreviations that are  
285 commonly used in medical records. We used fasttext v0.9.2<sup>26</sup> to train 100-dimensional bigram  
286 word embeddings with the parameters `fasttext skipgram -wordNgrams 2`. Word embeddings  
287 were trained on a compendium of more than 10 million clinical notes ranging from 2002 to 2020,  
288 based on more than 330,000 subjects, with up to 50 notes per subject.

### 289 ***Training of event adjudication models***

290 The event adjudication model was constructed with the combination of 1D-CNN and long-short-  
291 term memory (LSTM). It consisted of a word embedding layer, which converts words into word  
292 vectors, followed by a 1D-CNN and LSTM combination network (schematic shown in **Figure S1**).  
293 The model was trained using data from derivation dataset. Each discharge summary was labeled  
294 as positive or negative for 4 outcomes of interest (heart failure hospitalization, PCI/CABG, ACS  
295 and ischemic stroke) and 4 separate models were trained for each outcome label. The model was

296 trained to minimize the binary cross entropy between model prediction and the label using  
297 RMSprop optimizer with initial learning rate of 0.0001. The model was trained for 150 epochs. At  
298 the end of each epoch, ROC-AUC on the validation dataset was calculated. The final model was  
299 chosen as the model with highest ROC-AUC on the validation cohort across all 150 epochs.

### 300 ***Selection of test results for respiratory virus infection***

301 Using a data dictionary, we identified identifiers for diagnostic tests for influenza A and B,  
302 parainfluenza, respiratory syncytial virus (RSV), coronavirus, and adenovirus and downloaded all  
303 relevant viral test results within the MGB-EDW. We limited analysis to tests having at least 5000  
304 patients. The test results were reported as free text. While most results were reported simply as  
305 positive or negative, in some cases, the descriptions of the viral test results were complex.  
306 Therefore, a physician (SG) reviewed all possible texts in the report and compiled a conversion  
307 table from the texts to positive/negative results. Since comprehensive reporting in the EDW  
308 started on Feb 2016, we included only results after that date.

### 309 ***Survival analysis for cardiovascular events***

310 To evaluate the influence of viral infection on 3 cardiovascular events (heart failure hospitalization,  
311 urgent revascularization and ischemic stroke), we performed a survival analysis for these  
312 outcomes. Due to limited numbers or follow-up length for other viruses, we focused our analysis  
313 on influenza and RSV. To avoid possible bias caused by the COVID-19 outbreak in Boston area,  
314 all the follow up were censored at February 2020. All viral test results between February 2016  
315 and February 2020 were identified. Positive patients were identified as those having at least one  
316 positive result for the virus of interest within the study period and the date of first positive result  
317 was used as the index date. Patients who had the test for the virus of interest but did not have  
318 any positive results were identified as a control population within that cohort. Index dates were  
319 identified as the date of first viral test for control patients. All patients who had other viral infections  
320 before the index date were excluded.

321 Outcome events were defined bases on the event text model predictions for heart failure  
322 hospitalization and urgent revascularization and ICD-10 codes for ischemic stroke. The cutoffs  
323 for the events were selected as the value that gave the best sensitivity at a specificity over 90%.  
324 Urgent revascularization was defined as positive results for PCI/CABG and ACS for the same  
325 discharge summary. All 3 outcome events were analyzed independently. Patients were censored  
326 at the first event, death, last encounter in the system or the end of study period, whichever  
327 occurred first. To account for confounders, we used a propensity-score matching method<sup>15</sup>. A

328 propensity score for a positive test was calculated with age, sex, race, smoking status, history of  
329 heart failure, history of coronary artery disease, history of atrial fibrillation, history of type 2  
330 diabetes mellitus, history of COPD, history of hypertension, history of dyslipidemia, use of loop  
331 diuretic, use of aspirin, use of P2Y<sub>12</sub> inhibitors and the method for viral test using logistic  
332 regression. In this analysis, the past histories were identified using ICD-10 codes. The between  
333 group difference in baseline characteristics was assessed by the standardized mean difference  
334 (SMD) where a value under 0.1 is considered negligible. Patients with positive viral results were  
335 matched to controls (without replacement) using a nearest neighbor method, as implemented in  
336 the *MatchIt* package (version 3.0.2) in *R* (version 3.5.1)<sup>27</sup>. The matching ratio was set to the  
337 highest number that did not introduce substantial difference in any baseline characteristics  
338 (SMD<0.1).

### 339 ***Training and testing of a past medical history model***

340 Since past medical history is defined using a cumulative record and not on a single note, we took  
341 a 2-step approach for training the history model. Our first step focused on classifying the note.  
342 Since some notes are totally unrelated to the history of disease (such as nutrition notes), we  
343 trained a model to classify if the note is informative for a specific history or not and a second  
344 model to actually classify if the history is positive or negative. To this end, each note was initially  
345 labeled with 3 labels (positive/negative and uninformative). During labeling, we also noticed that  
346 there were some notes that stated an ambiguous condition (e.g. extremely low ejection fraction  
347 without noting if the patient have symptoms or not for heart failure). We labeled these by a 4th  
348 label (ambiguous) and excluded these from the training data. Two sets of notes were used for  
349 model training and testing from the MGB-EDW database where the training set were partially  
350 enriched with the use of ICD10 codes heart failure and the test set selected randomly. The final  
351 numbers of notes were 819 for training set and 365 for the test set. The note-level models resulted  
352 in note-level accuracy of AUC 0.93 for informativeness and 0.93 for the presence of heart failure  
353 history (**Figure S2A**).

354 The second step focused on combining all the note-level output to identify the past medical history  
355 status for each patient for a specific date. To this end, we built a time-series neural network-model  
356 that takes note-level prediction for informativeness and past medical history status along with the  
357 dates of the note relative to the index date as input. The model produces a single binary output  
358 reflecting the probability of the patient having the disease history at the index date (**Figure S2B**).  
359 For this model, we labeled a separate patient dataset (with no overlap with the note level history  
360 model patients) consisting of 561 patient-date pairs for training and 305 patient-date pairs for

361 testing. The patients in the training datasets were partially enriched for past medical history using  
362 the event adjudication model to select patients who had an event before the index date. In contrast,  
363 the patients in test set were randomly selected from a group of patients 60 years and above who  
364 had received an electrocardiogram at MGB. The labeling was done by reading all the notes  
365 associated with that patient to identify if the patient had a positive history of the disease at the  
366 index date. The input data was constructed as time-series data of the note-level output for all the  
367 notes within  $\pm 2500$  days of index date. Each output value was inserted into a vector of length  
368 5000 (each element corresponding to the date relative to index date). The neural network was  
369 trained to take this vector as input and a binary 1/0 value as output.

### 370 ***Sensitivity analysis with various thresholds for heart failure history***

371 To evaluate if the results of our survival analysis was sensitive to the sensitivity/specificity of the  
372 past medical history detection method, repeated the survival analysis for heart failure  
373 hospitalization using the heart failure history defined based on the time-series history model with  
374 various cutoff points. We used 3 cutoff points for this analysis, each of which giving (1) highest  
375 specificity with sensitivity  $\geq 0.95$ , (2) sensitivity and specificity both over  $> 0.90$ , (3) highest  
376 sensitivity with specificity  $\geq 0.95$ . The cutoffs were 0.24 (sensitivity=0.96, specificity=0.83), 0.41  
377 (sensitivity=0.90, specificity=0.93) and 0.43 (sensitivity=0.68, specificity=0.98). The propensity  
378 score matching was re-done using the model-based heart failure history instead of ICD-10 code-  
379 based heart failure history.

380

381

## 382 **References**

383

- 384 1. O'Malley KJ, Cook KF, Price MD, Wildes KR, Hurdle JF, Ashton CM. Measuring Diagnoses:  
385 ICD Code Accuracy. *Health Serv Res.* 2005;40:1620–1639.
- 386 2. Wei W-Q, Teixeira PL, Mo H, Cronin RM, Warner JL, Denny JC. Combining billing codes,  
387 clinical notes, and medications from electronic health records provides superior phenotyping  
388 performance. *J Am Med Inform Assn.* 2016;23:e20–e27.
- 389 3. Lash TL, Fox MP, MacLehose RF, Maldonado G, McCandless LC, Greenland S. Good practices  
390 for quantitative bias analysis. *Int J Epidemiol.* 2014;43:1969–1985.
- 391 4. Patadia VK, Coloma P, Schuemie MJ, Herings R, Gini R, Mazzaglia G, Picelli G, Fornari C,  
392 Pedersen L, Lei J van der, Sturkenboom M, Trifirò G, consortium E-A. Using real-world  
393 healthcare data for pharmacovigilance signal detection – the experience of the EU-ADR project.  
394 *Expert Rev Clin Phar.* 2014;8:95–102.
- 395 5. Falsey AR, Hennessey PA, Formica MA, Cox C, Walsh EE. Respiratory Syncytial Virus  
396 Infection in Elderly and High-Risk Adults. *New Engl J Med.* 2005;352:1749–1759.
- 397 6. Kytömaa S, Hegde S, Claggett B, Udell JA, Rosamond W, Temte J, Nichol K, Wright JD,  
398 Solomon SD, Vardeny O. Association of Influenza-like Illness Activity With Hospitalizations for  
399 Heart Failure. *Jama Cardiol.* 2019;4:363–369.
- 400 7. Kwong JC, Schwartz KL, Campitelli MA, Chung H, Crowcroft NS, Karnauchow T, Katz K, Ko  
401 DT, McGeer AJ, McNally D, Richardson DC, Rosella LC, Simor A, Smieja M, Zahariadis G,  
402 Gubbay JB. Acute Myocardial Infarction after Laboratory-Confirmed Influenza Infection. *New*  
403 *Engl J Medicine.* 2018;378:345–353.
- 404 8. Barnes M, Heywood AE, Mahimbo A, Rahman B, Newall AT, Macintyre CR. Acute myocardial  
405 infarction and influenza: a meta-analysis of case–control studies. *Heart.* 2015;101:1738.
- 406 9. Inciardi RM, Lupi L, Zaccone G, Italia L, Raffo M, Tomasoni D, Cani DS, Cerini M, Farina D,  
407 Gavazzi E, Maroldi R, Adamo M, Ammirati E, Sinagra G, Lombardi CM, Metra M. Cardiac  
408 Involvement in a Patient With Coronavirus Disease 2019 (COVID-19). *Jama Cardiol.*  
409 2020;5:819–824.
- 410 10. Doyen D, Mocerri P, Ducreux D, Dellamonica J. Myocarditis in a patient with COVID-19: a  
411 cause of raised troponin and ECG changes. *Lancet.* 2020;395:1516.
- 412 11. Madjid M, Safavi-Naeini P, Solomon SD, Vardeny O. Potential Effects of Coronaviruses on  
413 the Cardiovascular System. *Jama Cardiol.* 2020;5:831–840.

- 414 12. Boehme AK, Luna J, Kulick ER, Kamel H, Elkind MSV. Influenza-like illness as a trigger for  
415 ischemic stroke. *Ann Clin Transl Neur*. 2018;5:456–463.
- 416 13. Hicks KA, Mahaffey KW, Mehran R, Nissen SE, Wiviott SD, Dunn B, Solomon SD, Marler  
417 JR, Teerlink JR, Farb A, Morrow DA, Targum SL, Sila CA, Hai MTT, Jaff MR, Joffe HV, Cutlip  
418 DE, Desai AS, Lewis EF, Gibson CM, Landray MJ, Lincoff AM, White CJ, Brooks SS, Rosenfield  
419 K, Domanski MJ, Lansky AJ, McMurray JJV, Tcheng JE, Steinhubl SR, Burton P, Mauri L,  
420 O’Connor CM, Pfeffer MA, Hung HMJ, Stockbridge NL, Chaitman BR, Temple RJ, (SCTI) SDC  
421 for CTI. 2017 Cardiovascular and Stroke Endpoint Definitions for Clinical Trials. *Circulation*.  
422 2018;137:961–972.
- 423 14. Berkson J. Limitations of the Application of Fourfold Table Analysis to Hospital Data., *Int J*  
424 *Epidemiol*. 2014;43:511–515.
- 425 15. Rosenbaum PR, Rubin DB. Assessing Sensitivity to an Unobserved Binary Covariate in an  
426 Observational Study with Binary Outcome. *J Royal Statistical Soc Ser B Methodol*. 1983;45:212–  
427 218.
- 428 16. Dafny LS. How Do Hospitals Respond to Price Changes? *Am Econ Rev*. 2005;95:1525–1547.
- 429 17. Hripcsak G, Albers DJ. Next-generation phenotyping of electronic health records. *J Am Med*  
430 *Inform Assn*. 2012;20:117–121.
- 431 18. Usama M, Ahmad B, Wan J, Hossain MS, Alhamid MF, Hossain MA. Deep Feature Learning  
432 for Disease Risk Assessment Based on Convolutional Neural Network With Intra-Layer Recurrent  
433 Connection by Using Hospital Big Data. *Ieee Access*. 2018;6:67927–67939.
- 434 19. Magna AAR, Allende-Cid H, Taramasco C, Becerra C, Figueroa RL. Application of Machine  
435 Learning and Word Embeddings in the Classification of Cancer Diagnosis Using Patient  
436 Anamnesis. *Ieee Access*. 2020;8:106198–106213.
- 437 20. Ivey KS, Edwards KM, Talbot HK. Respiratory Syncytial Virus and Associations With  
438 Cardiovascular Disease in Adults. *J Am Coll Cardiol*. 2018;71:1574–1583.
- 439 21. Ukimura A, Satomi H, Ooi Y, Kanzaki Y. Myocarditis Associated with Influenza A  
440 H1N1pdm2009. *Influ Res Treat*. 2012;2012:351979.
- 441 22. Drozd M, Garland E, Walker AMN, Slater TA, Koshy A, Straw S, Gierula J, Paton M, Lowry  
442 J, Sapsford R, Witte KK, Kearney MT, Cubbon RM. Infection-Related Hospitalization in Heart  
443 Failure With Reduced Ejection Fraction. *Circulation Hear Fail*. 2020;13:e006746.
- 444 23. Hernán MA, Hernández-Díaz S, Robins JM. A Structural Approach to Selection Bias.  
445 *Epidemiology*. 2004;15:615–625.



- 446 24. Shi S, Qin M, Shen B, Cai Y, Liu T, Yang F, Gong W, Liu X, Liang J, Zhao Q, Huang H,  
447 Yang B, Huang C. Association of Cardiac Injury With Mortality in Hospitalized Patients With  
448 COVID-19 in Wuhan, China. *Jama Cardiol.* 2020;5:802–810.
- 449 25. Honnibal M, Montani I. SpaCy 2: Natural language understanding with bloom embeddings,  
450 convolutional neural networks and incremental parsing. *To appear.* 2017;7.
- 451 26. Bojanowski P, Grave E, Joulin A, Mikolov T. Enriching word vectors with subword  
452 information. *Transactions of the Association for Computational Linguistics.* 2017;5:135--146.
- 453 27. Ho DE, Imai K, King G, Stuart EA. Matching as Nonparametric Preprocessing for Reducing  
454 Model Dependence in Parametric Causal Inference. *Polit Anal.* 2007;15:199–236.
- 455

## Figures

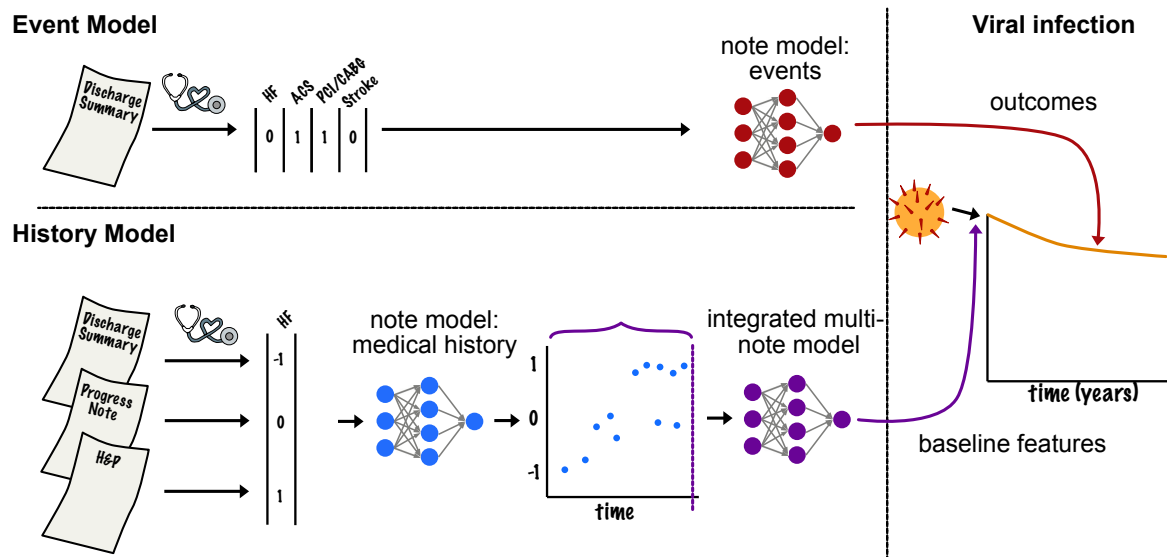

**Figure 1. Schematic illustration of the study flow.**

A large compendium of cardiologist-labeled discharge summaries and progress notes were used to train four cardiovascular event adjudication models and a heart failure history model using neural networks. The models were deployed on 17 million notes for 267,596 patients to evaluate the impact of respiratory virus infections on delayed cardiovascular events.

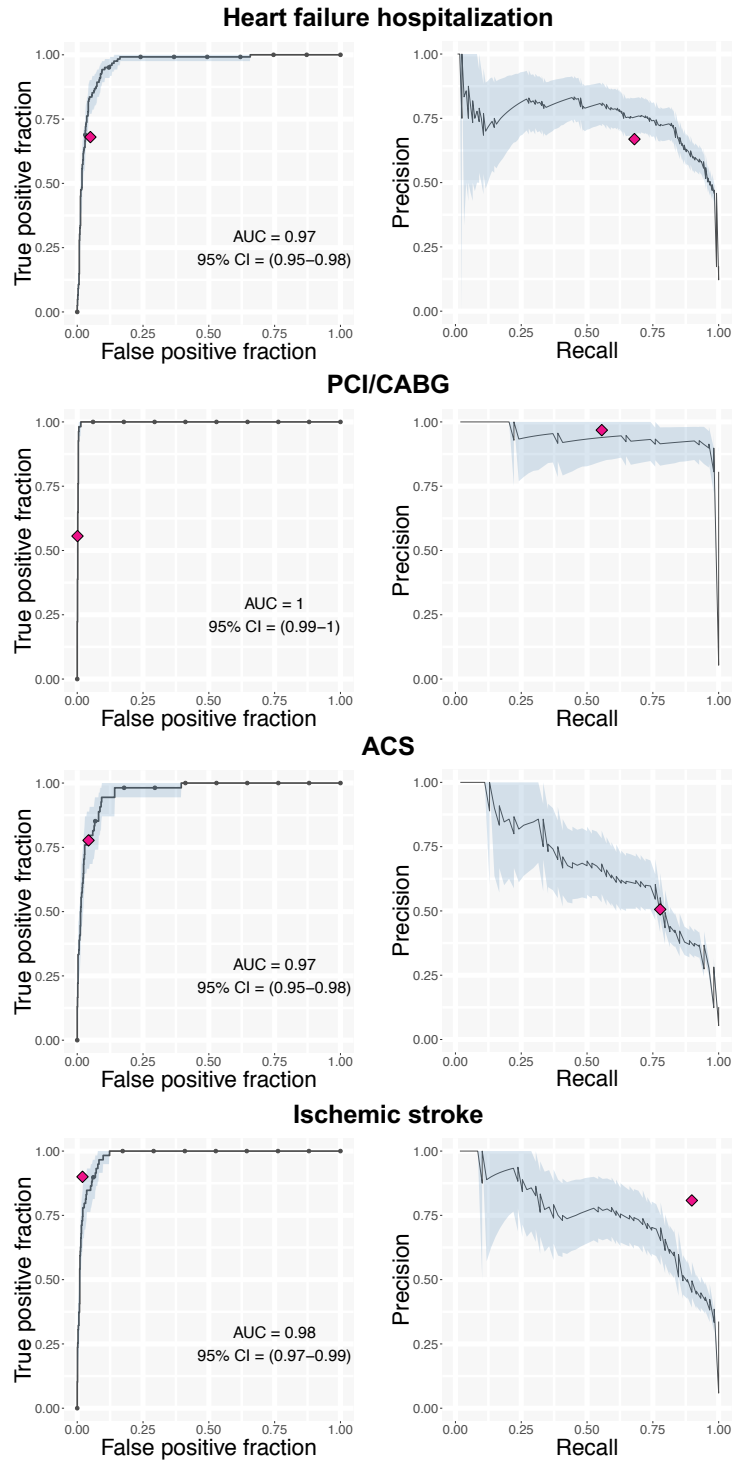

**Figure 2. Accuracy of event adjudication model to classify hospitalized events.**

Receiver operating characteristics curves (left) and precision-recall curves (right) for event adjudication models for PCI/CABG, ACS, heart failure hospitalization and ischemic stroke in the test dataset. Light blue area indicates 95% confidence interval and the pink diamond indicates the sensitivity and specificities of the ICD-10 code-based diagnosis.

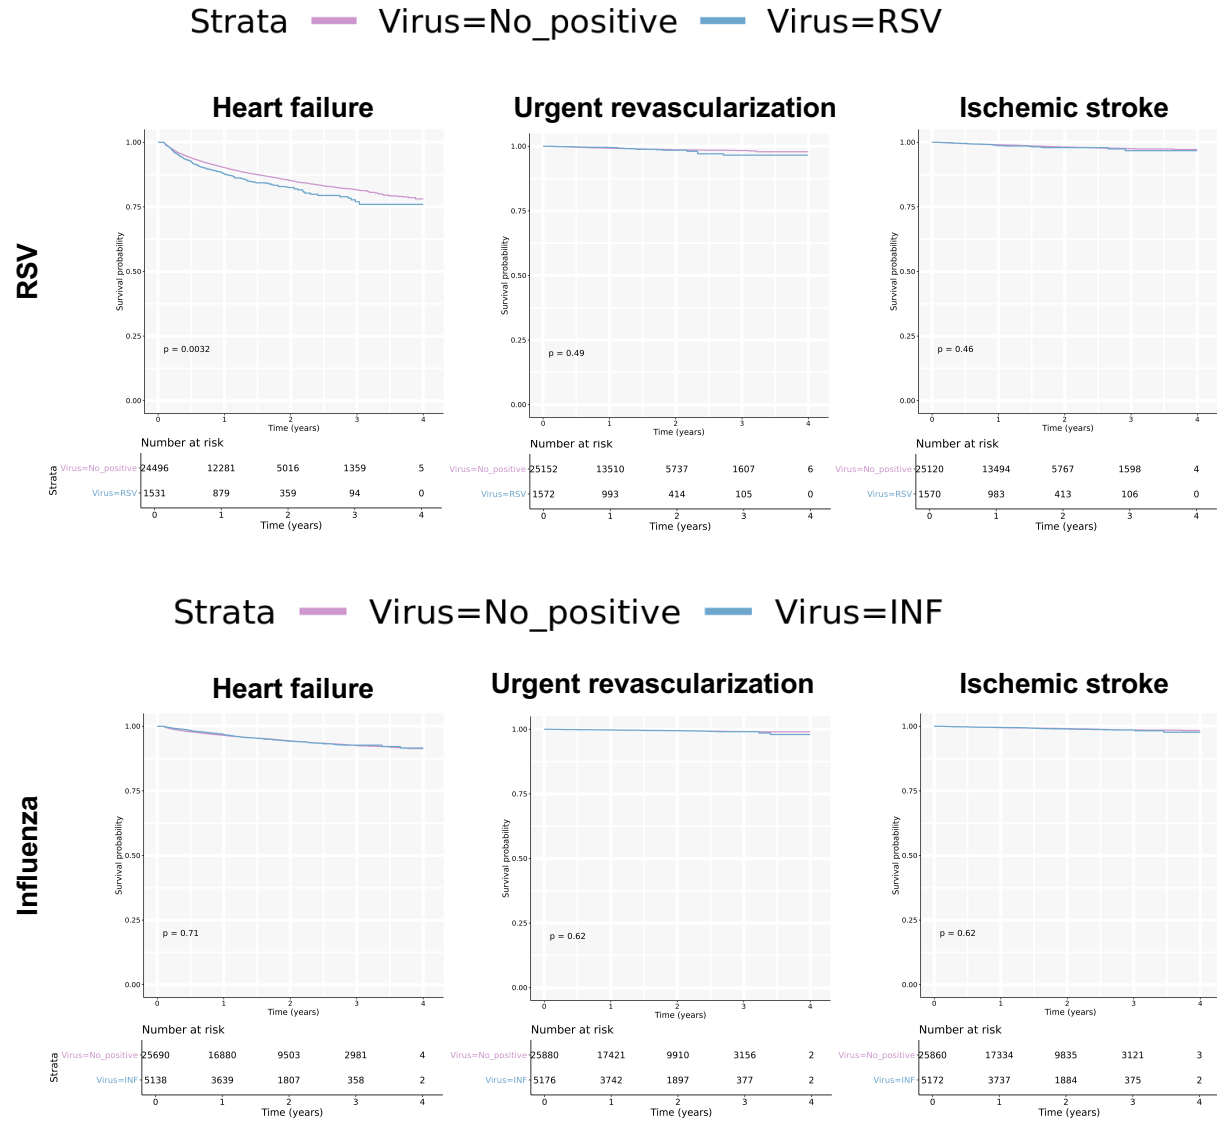

**Figure 3. Survival analysis for RSV and influenza infection on cardiovascular events.**

Kaplan-Meier plot comparing event rates of heart failure hospitalization, urgent revascularization and ischemic stroke in virus positive and negative population for RSV and influenza. Abbreviations, RSV: respiratory syncytial virus, INF: influenza virus.

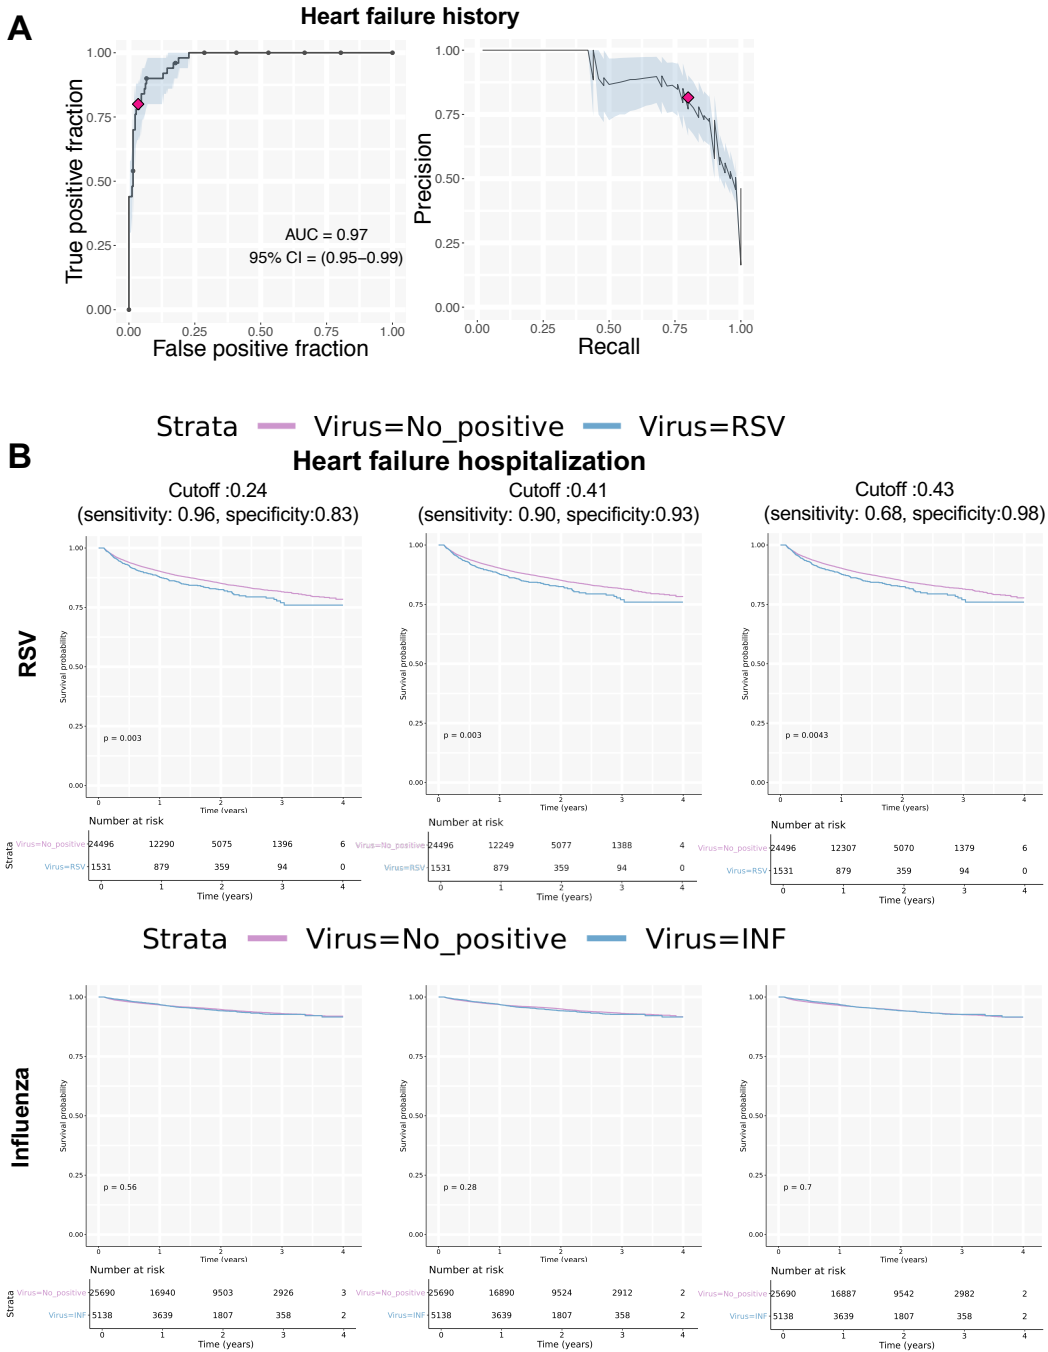

**Figure 4. Sensitivity analysis evaluating different thresholds for a past medical history of heart failure on the risk of heart failure hospitalization with viral infection.**

(A) Receiver operating characteristics curves for the heart failure past medical history model. (B) Kaplan-Meier plot comparing event rates of heart failure hospitalization in virus positive and negative populations for RSV and influenza with various cutoffs for heart failure history. Sensitivity and specificity for detecting heart failure histories with the corresponding cutoffs are shown. Abbreviations, RSV: respiratory syncytial virus, INF: influenza virus.

## Tables

**Table 1. Sensitivity and specificity of ICD-10 code**

| Model                         | Sensitivity | Specificity |
|-------------------------------|-------------|-------------|
| PCI/CABG                      | 0.30        | 1.00        |
| ACS                           | 0.78        | 0.95        |
| Heart failure hospitalization | 0.68        | 0.95        |
| Ischemic stroke               | 0.95        | 0.93        |

**Table 2. Cutoffs, sensitivity and specificity of the event adjudication model**

| Model                         | Cutoff used for survival analysis | Sensitivity (95% CI) | Specificity (95% CI) |
|-------------------------------|-----------------------------------|----------------------|----------------------|
| PCI/CABG                      | 0.73                              | 1.00 (1.00-1.00)     | 0.99 (0.98-1.00)     |
| ACS                           | 0.04                              | 0.91 (0.83-0.98)     | 0.91 (0.89-0.93)     |
| Heart failure hospitalization | 0.12                              | 0.94 (0.90-0.98)     | 0.91 (0.89-0.93)     |
| Ischemic stroke               | 0.59                              | 0.98 (0.95-1.00)     | 0.90 (0.88-0.92)     |

## Supplementary Figures

A

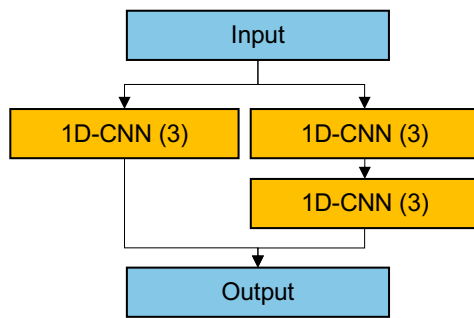

B

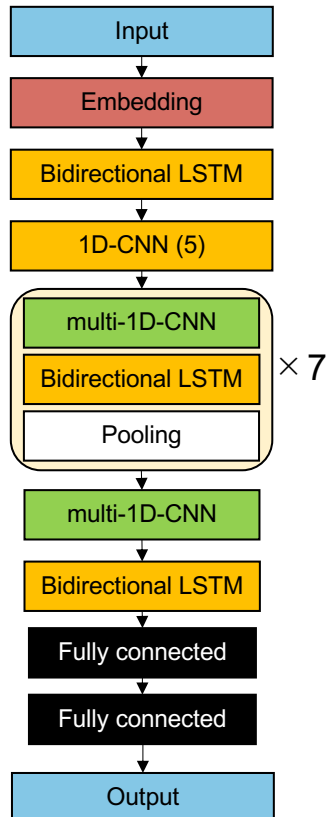

**Figure S1: Schematic drawing of the network structure of the event adjudication model.**

(A) Structure of the multi-1D-CNN module and (B) the full network structure of the model

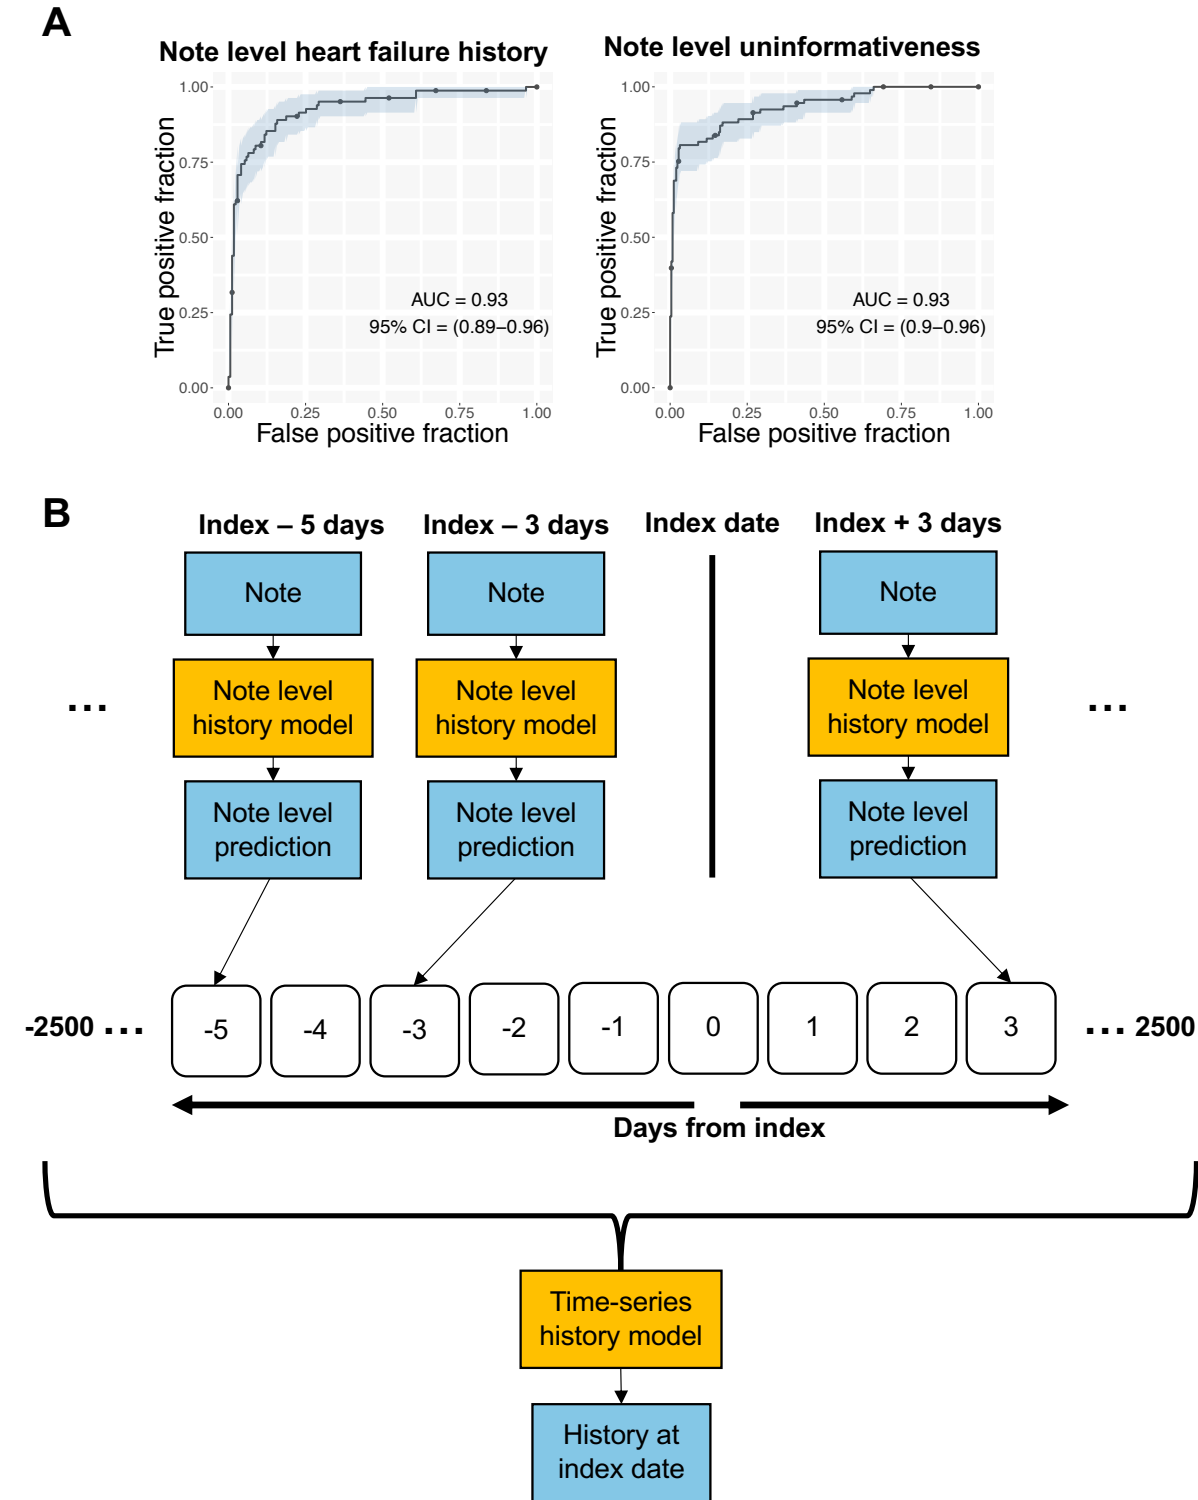

**Figure S2: Past medical history model.**

(A) ROC curves showing performance of note-level past medical history and uninformative-ness model. (B) Schematic drawing for time-series model for past medical history.



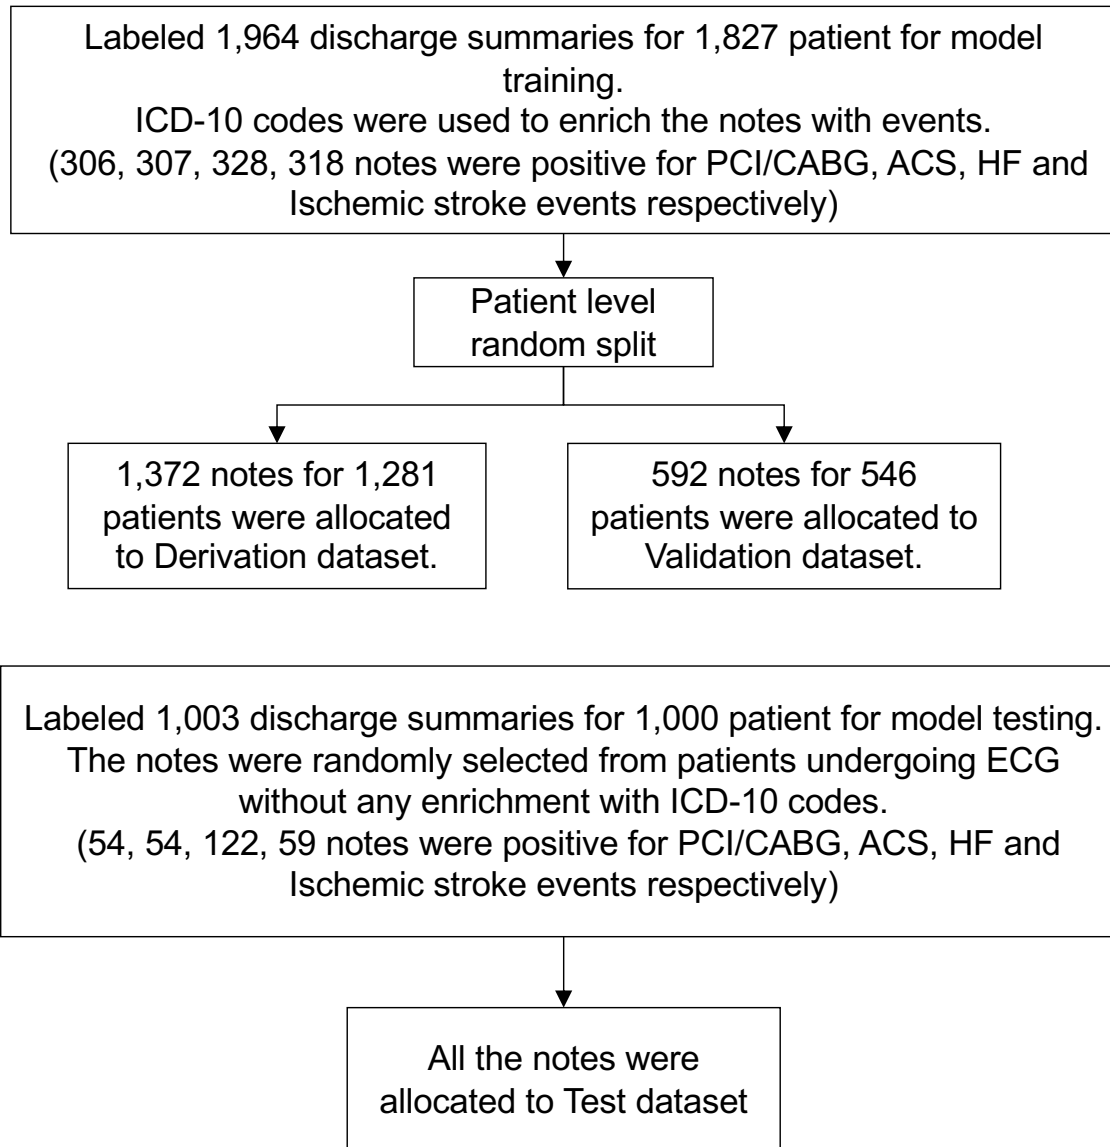

**Figure S3. Flow diagram of notes selection used for training and testing event adjudication models.**

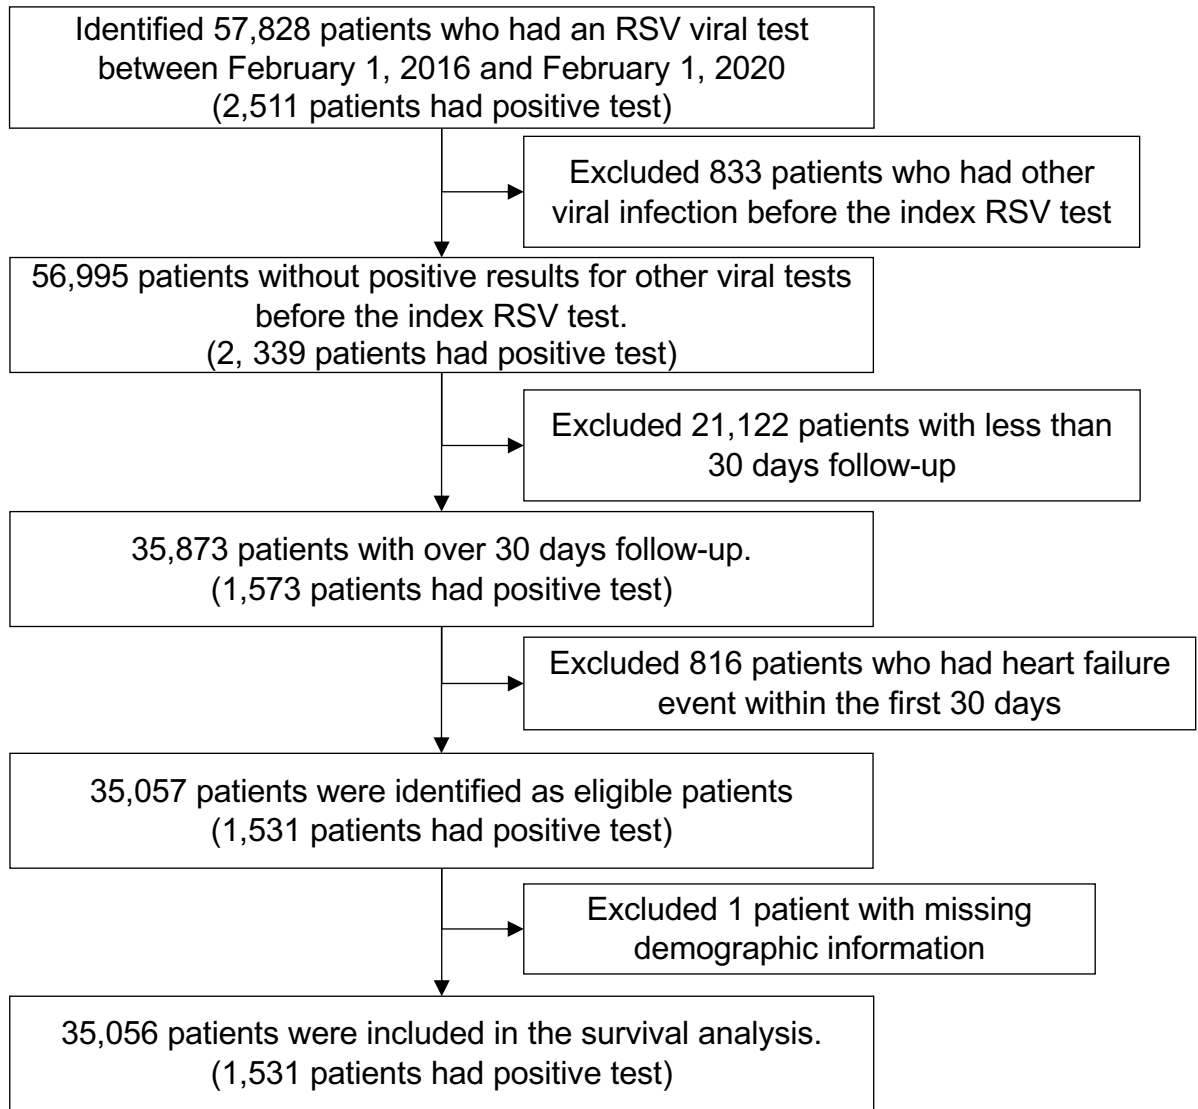

**Figure S4. Flow diagram of patient selection for survival analysis for heart failure hospitalization in patients who had an RSV viral test between February 1, 2016 and February 1, 2020.**

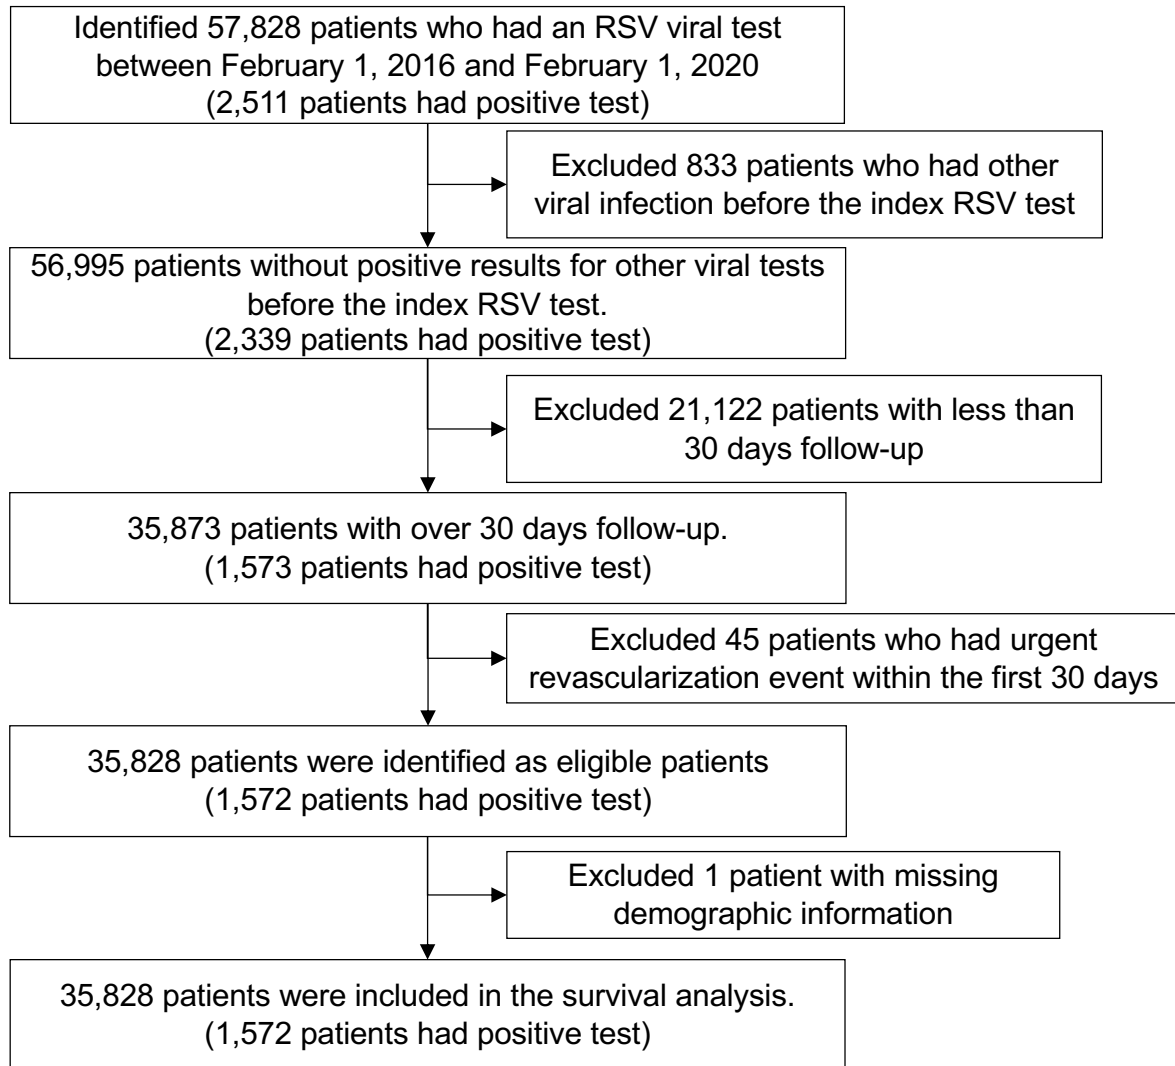

**Figure S5. Flow diagram of patient selection for survival analysis on urgent revascularization in patients undergoing RSV viral tests.**

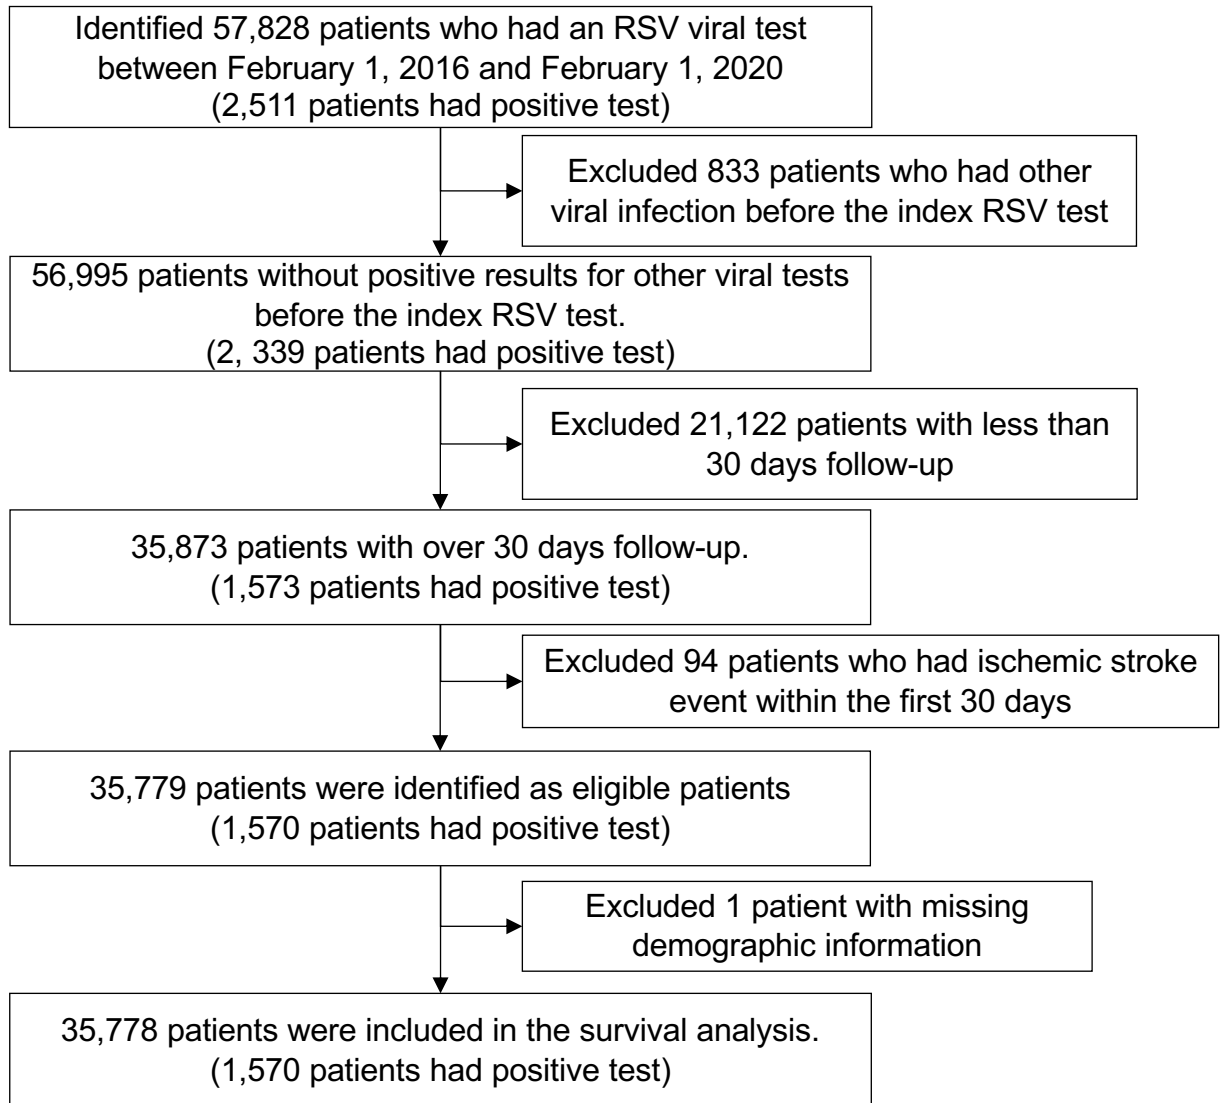

**Figure S6. Flow diagram of patient selection for survival analysis on ischemic stroke in patients undergoing RSV viral tests.**

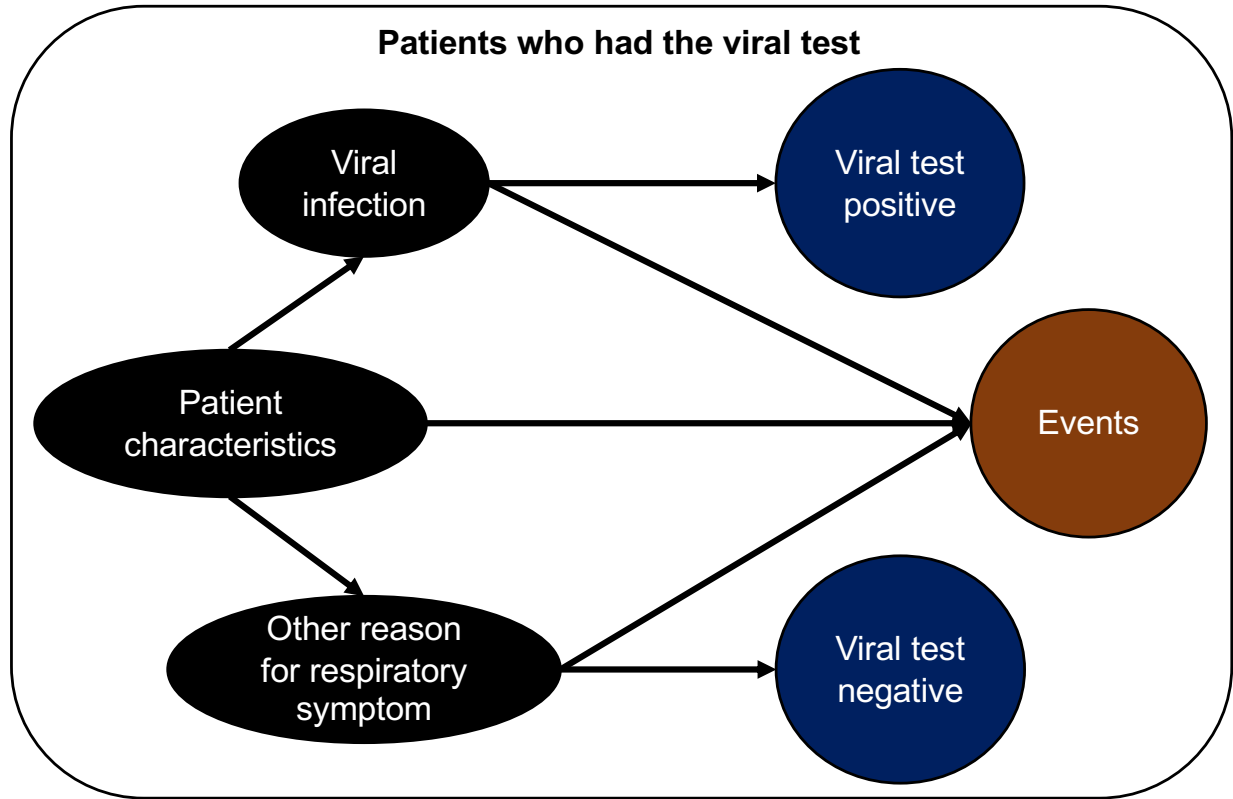

**Figure S7. Graphical model illustrating potential selection bias in patients who underwent testing for a respiratory virus.** Selecting patients based on having undergone a viral test induces an inverse association between viral infection and other causes of respiratory symptoms (collider bias). The latter may also influence the probability of delayed cardiovascular events, and thus were handled by adjustment.

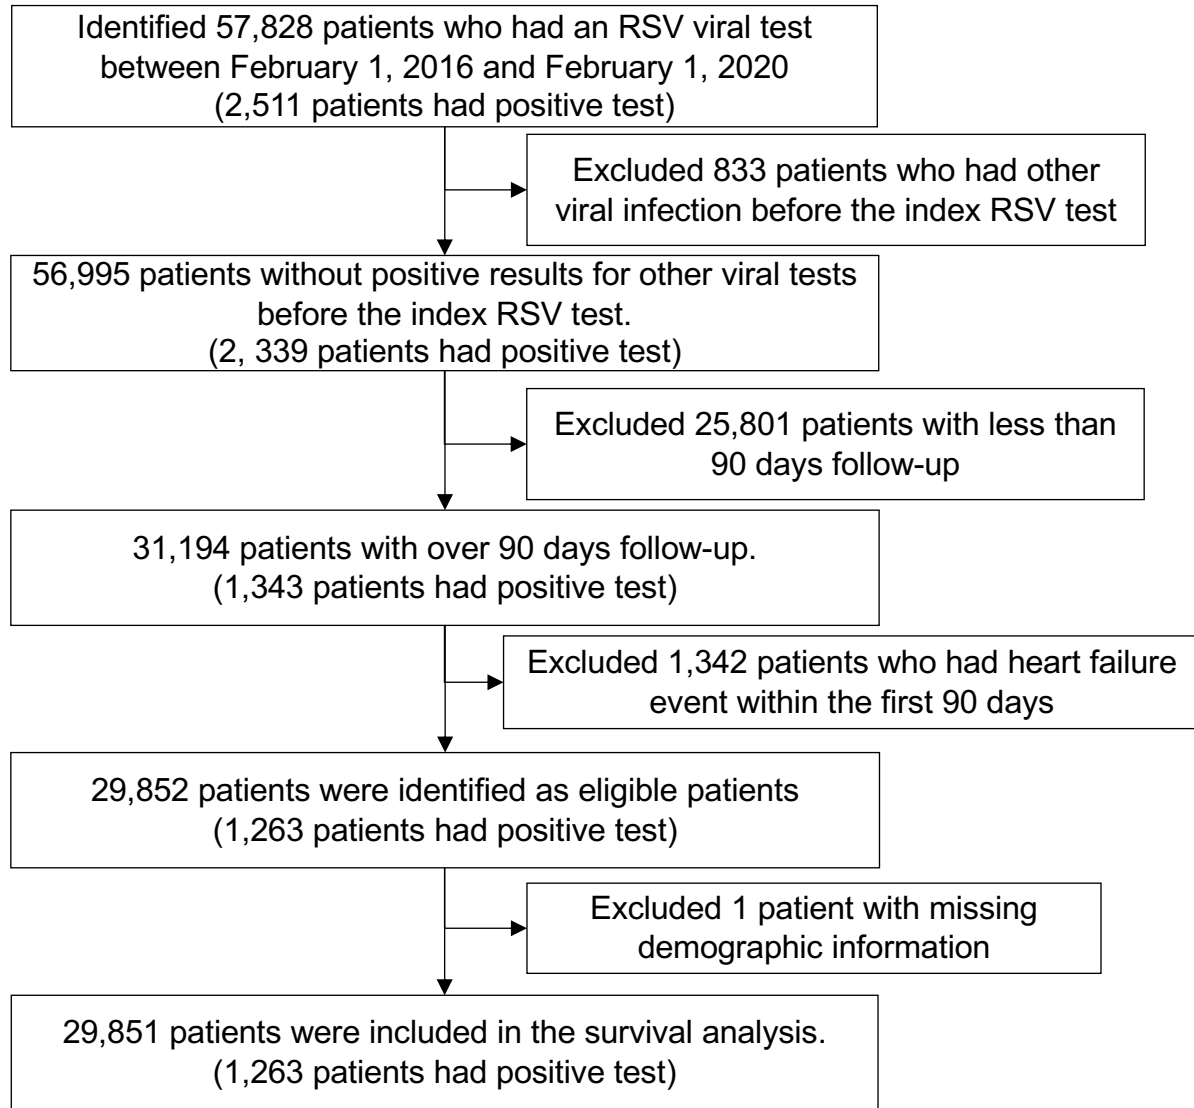

**Figure S8. Flow diagram of patient selection for survival analysis on heart failure in patients undergoing RSV viral tests (excluding those who had event within the first 90 days).**

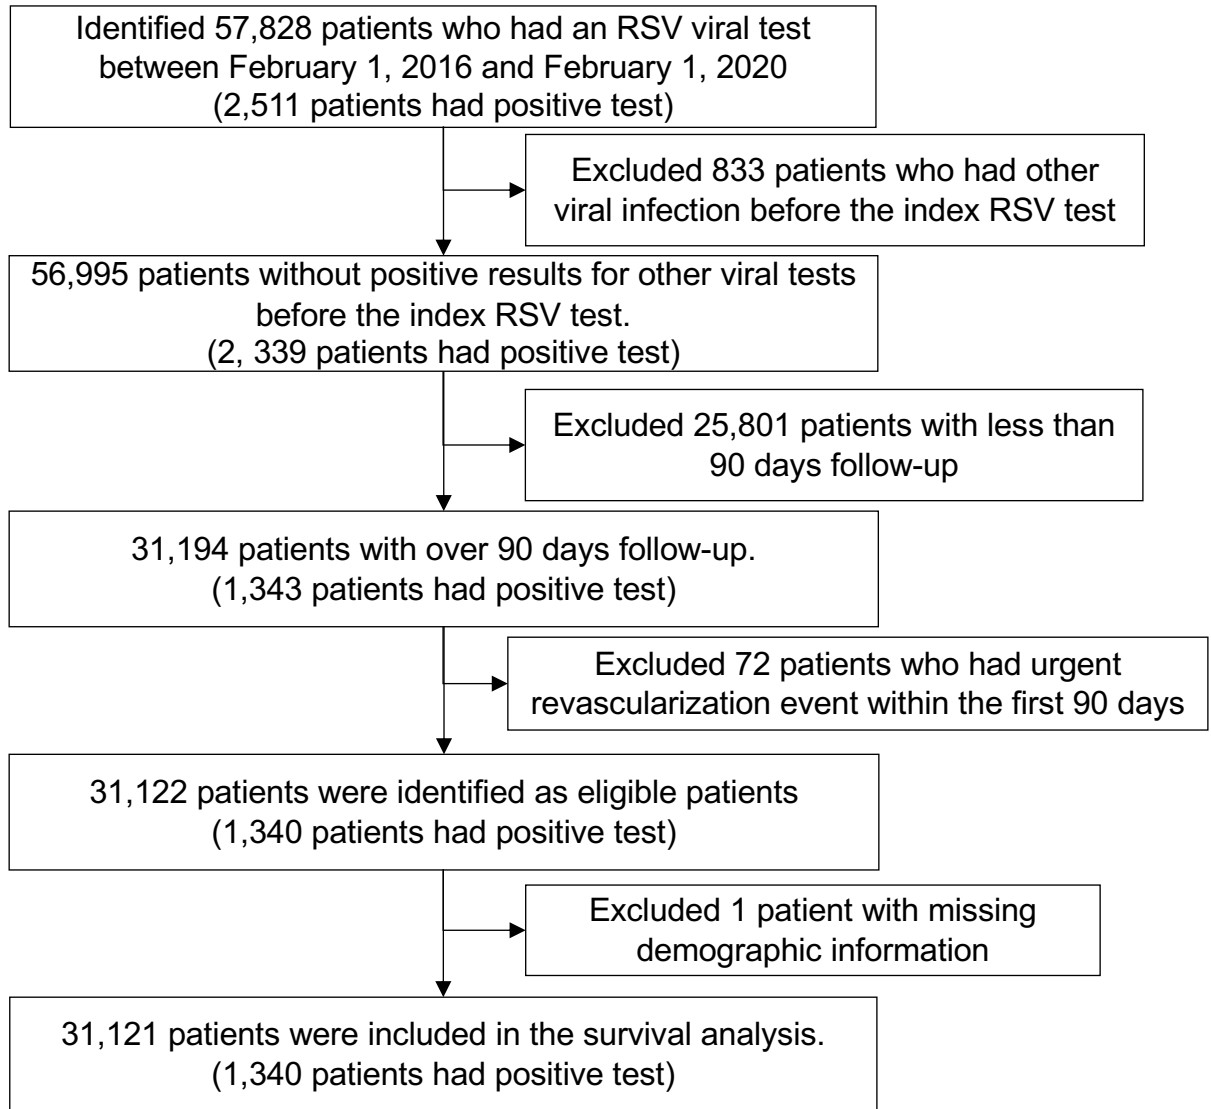

**Figure S9. Flow diagram of patient selection for survival analysis on urgent revascularization in patients undergoing RSV viral tests (excluding those who had event within the first 90 days).**

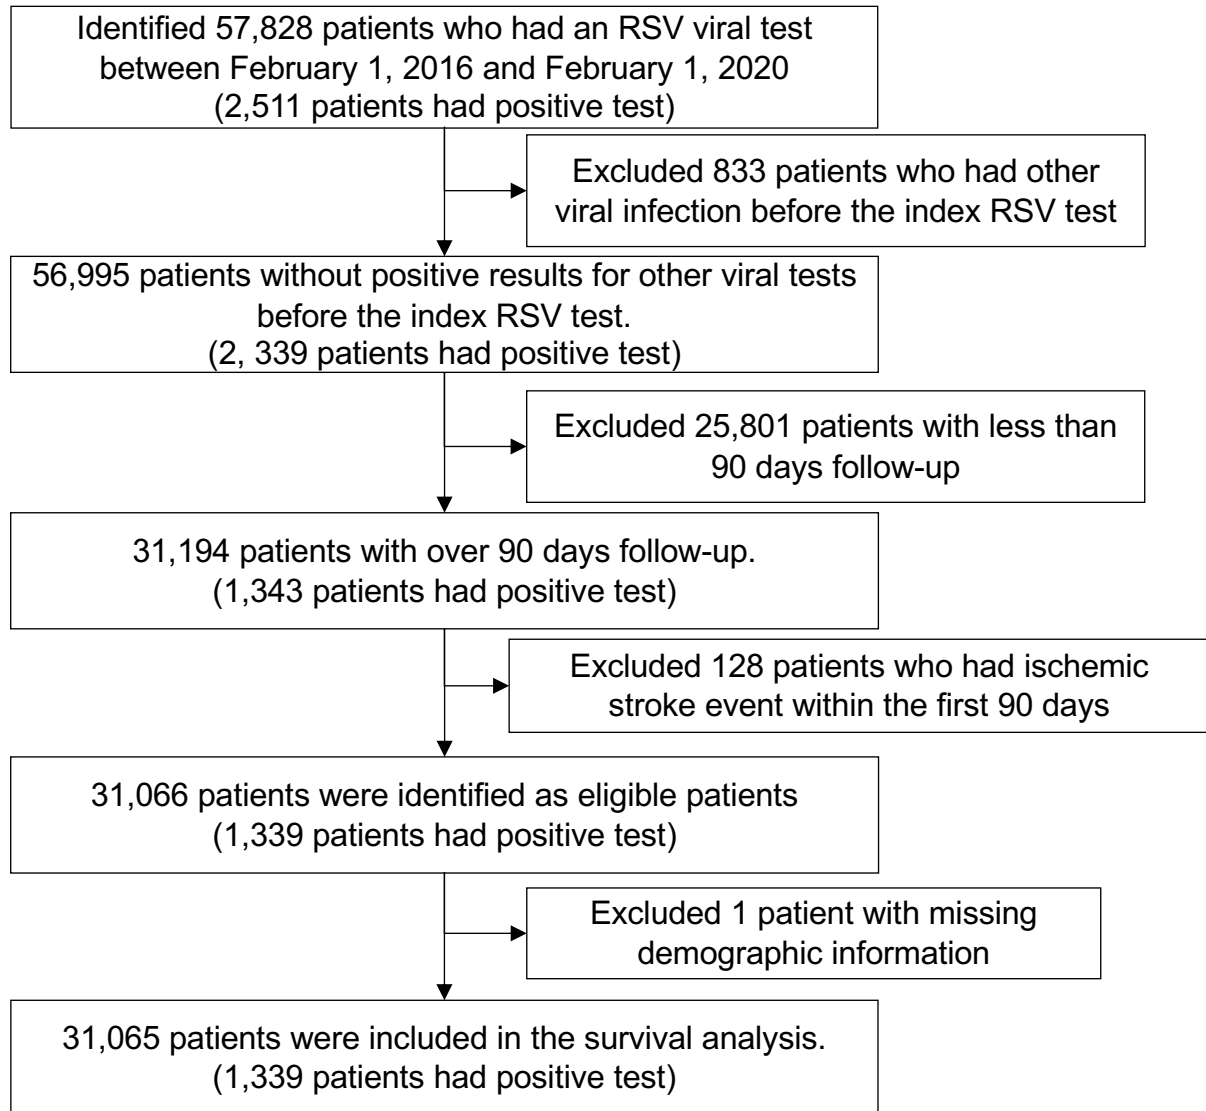

**Figure S10. Flow diagram of patient selection for survival analysis on ischemic stroke in patients undergoing RSV viral tests (excluding those who had event within the first 90 days).**



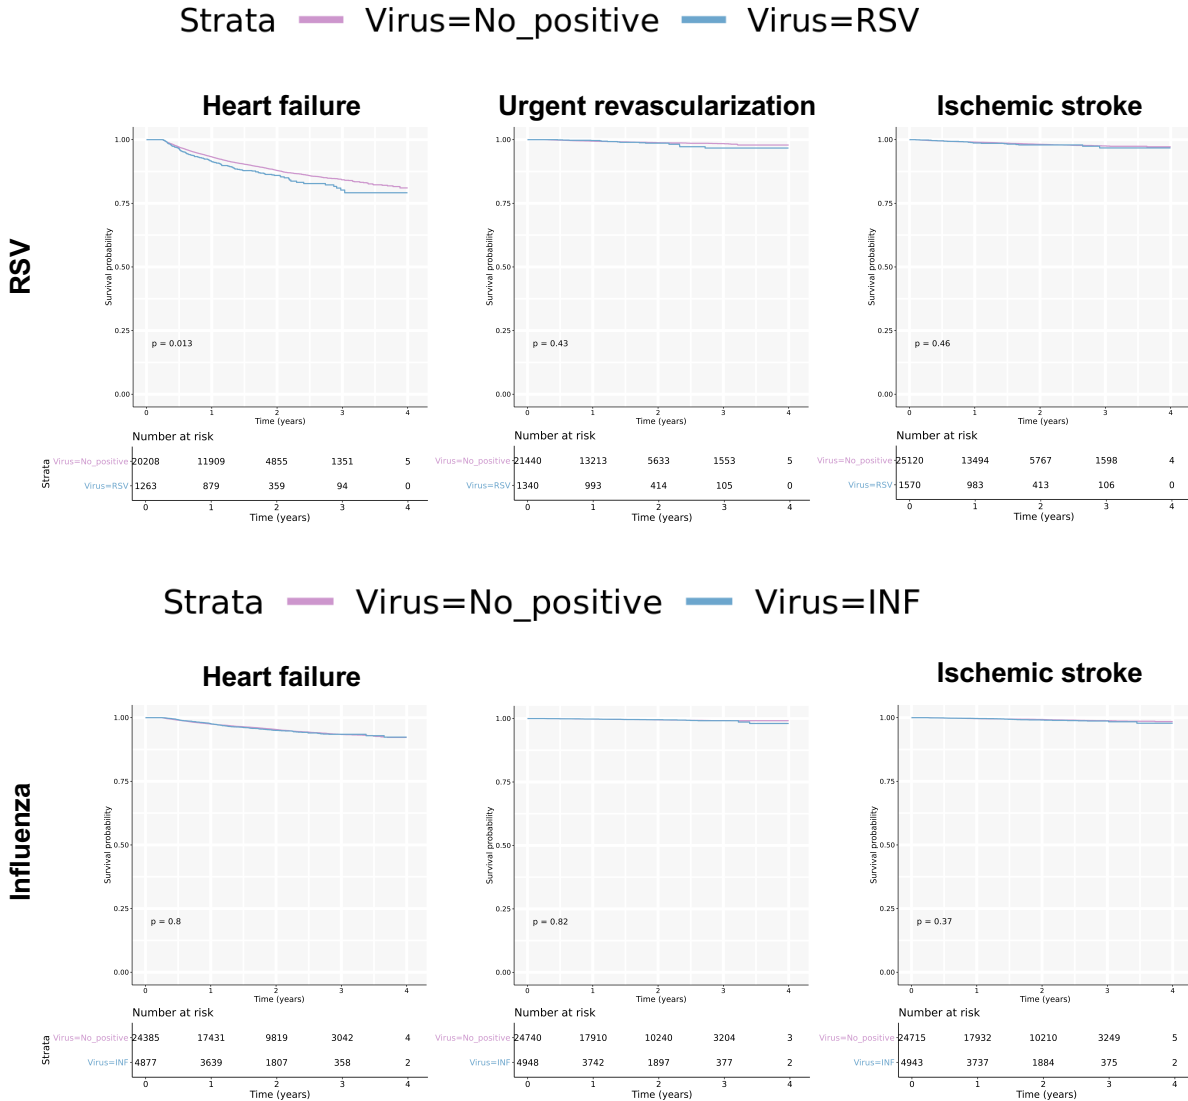

**Figure S11. Survival analysis for RSV and influenza infection on cardiovascular events (excluding those who had event within the first 90 days).**

Kaplan-Meier plot comparing event rates of heart failure hospitalization, urgent revascularization and ischemic stroke in virus positive and negative population for RSV and influenza. Abbreviations, RSV: respiratory syncytial virus, INF: influenza virus.

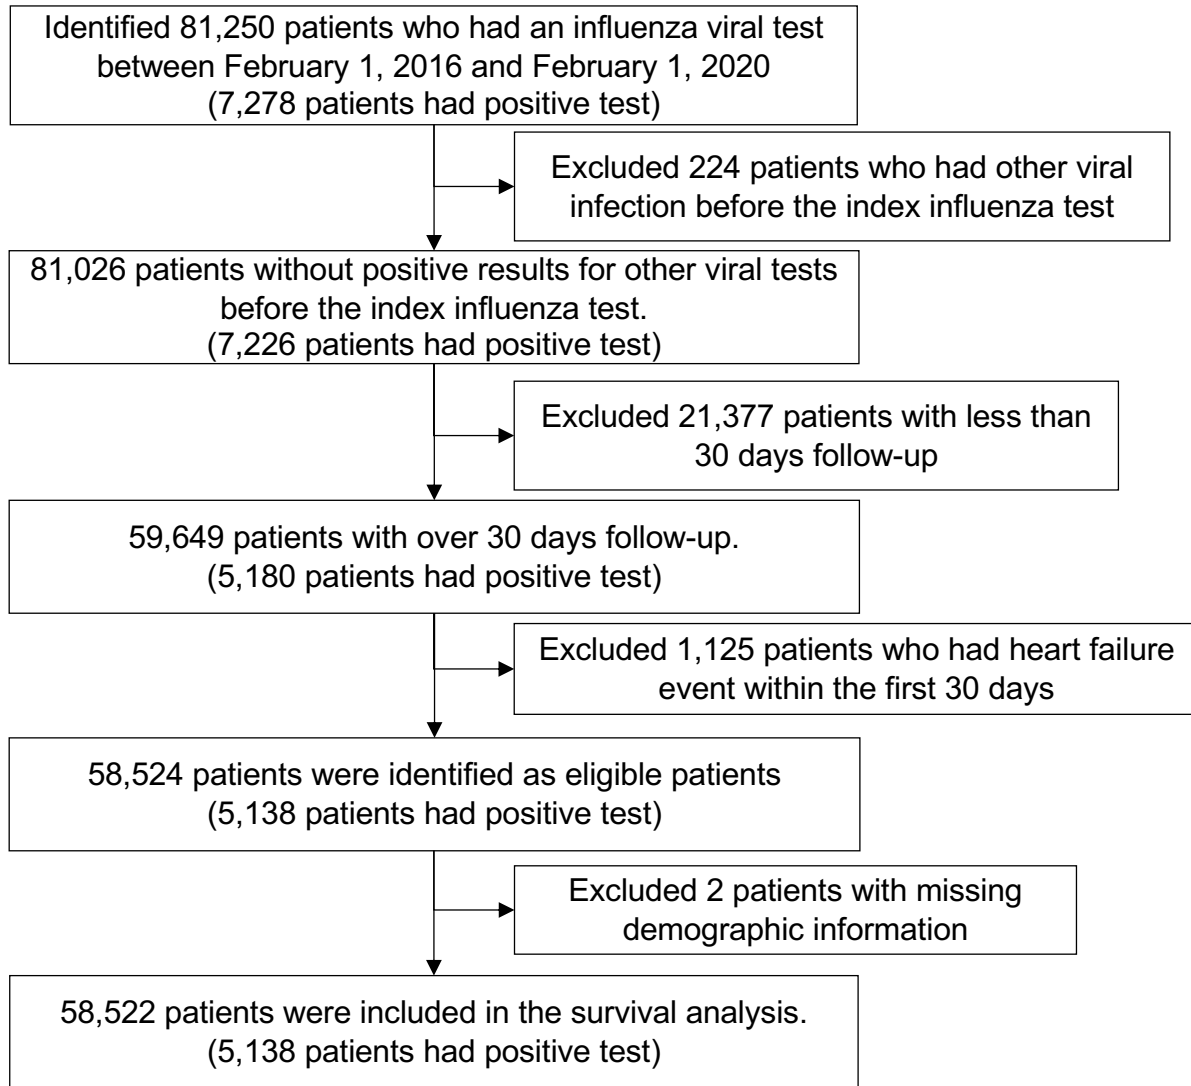

**Figure S12. Flow diagram of patient selection for survival analysis on heart failure hospitalization in patients undergoing influenza viral tests.**

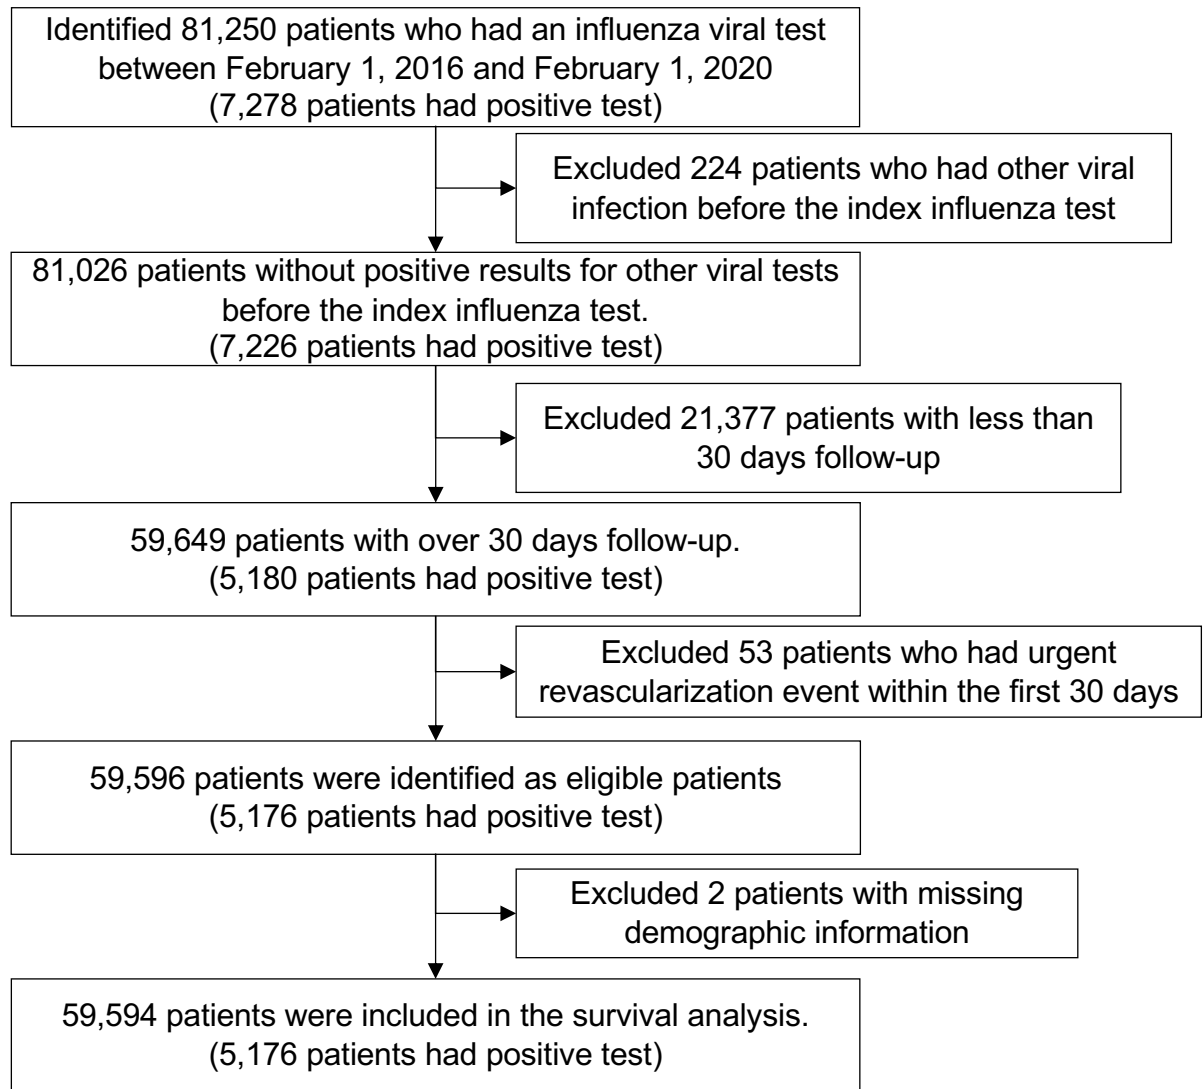

**Figure S13. Flow diagram of patient selection for survival analysis on urgent revascularization in patients undergoing influenza viral tests.**

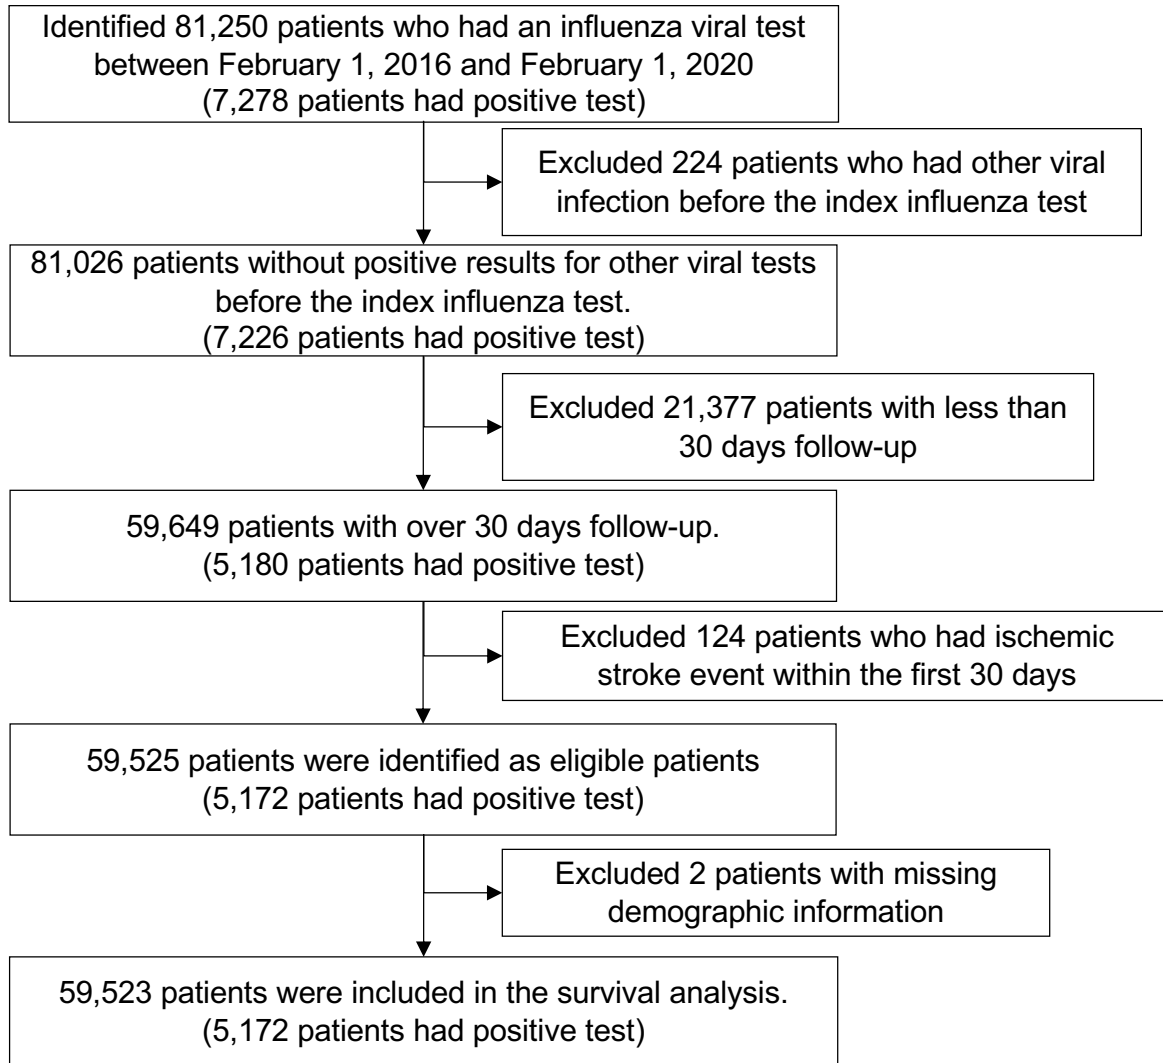

**Figure S14. Flow diagram of patient selection for survival analysis on ischemic stroke in patients undergoing influenza viral tests.**

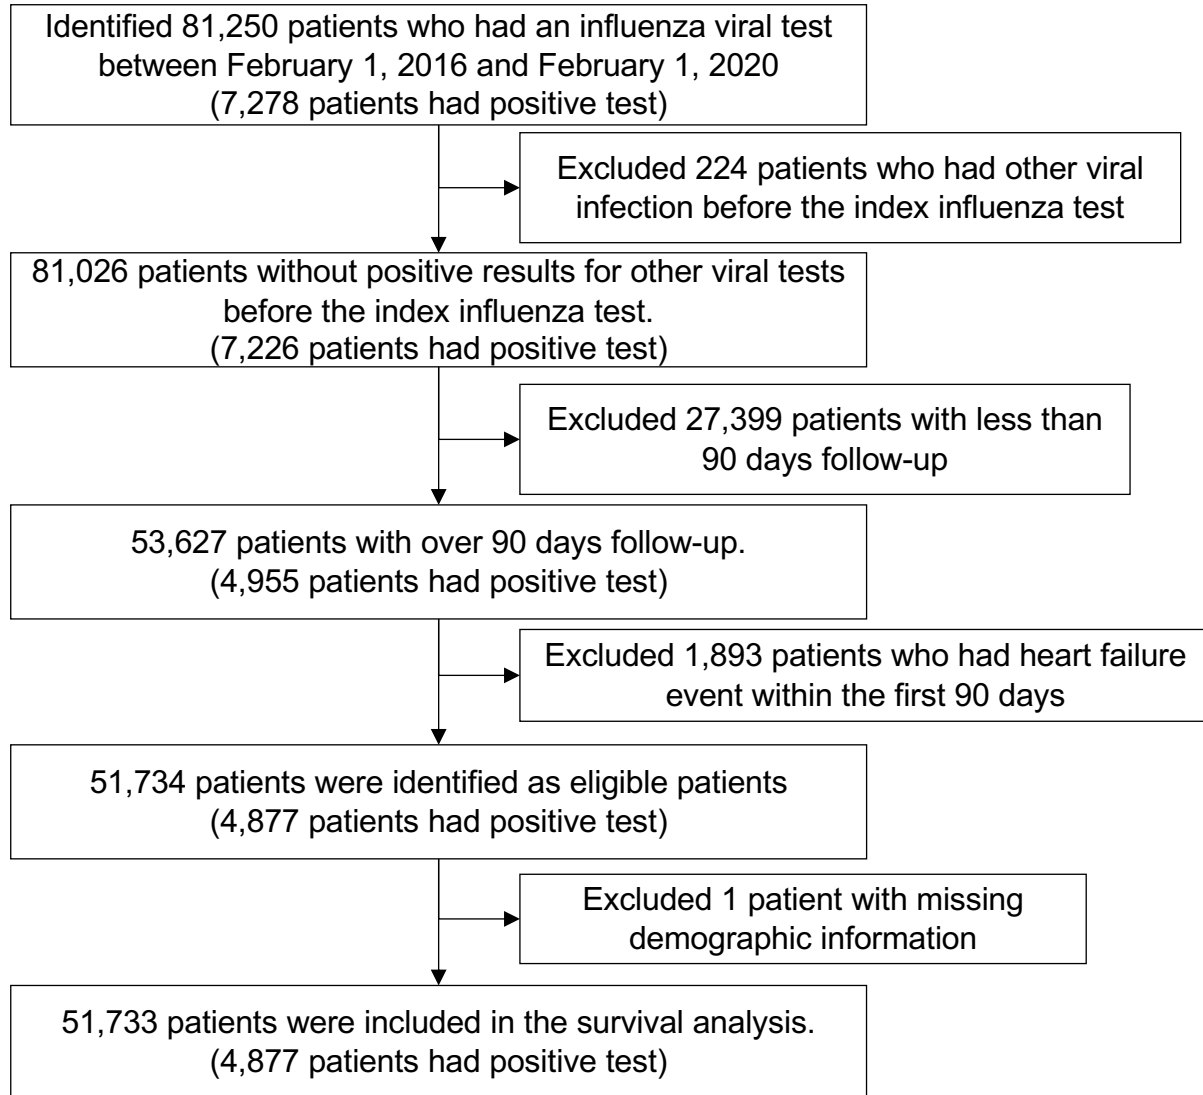

**Figure S15. Flow diagram of patient selection for survival analysis on heart failure in patients undergoing influenza viral tests (excluding those who had event within the first 90 days).**

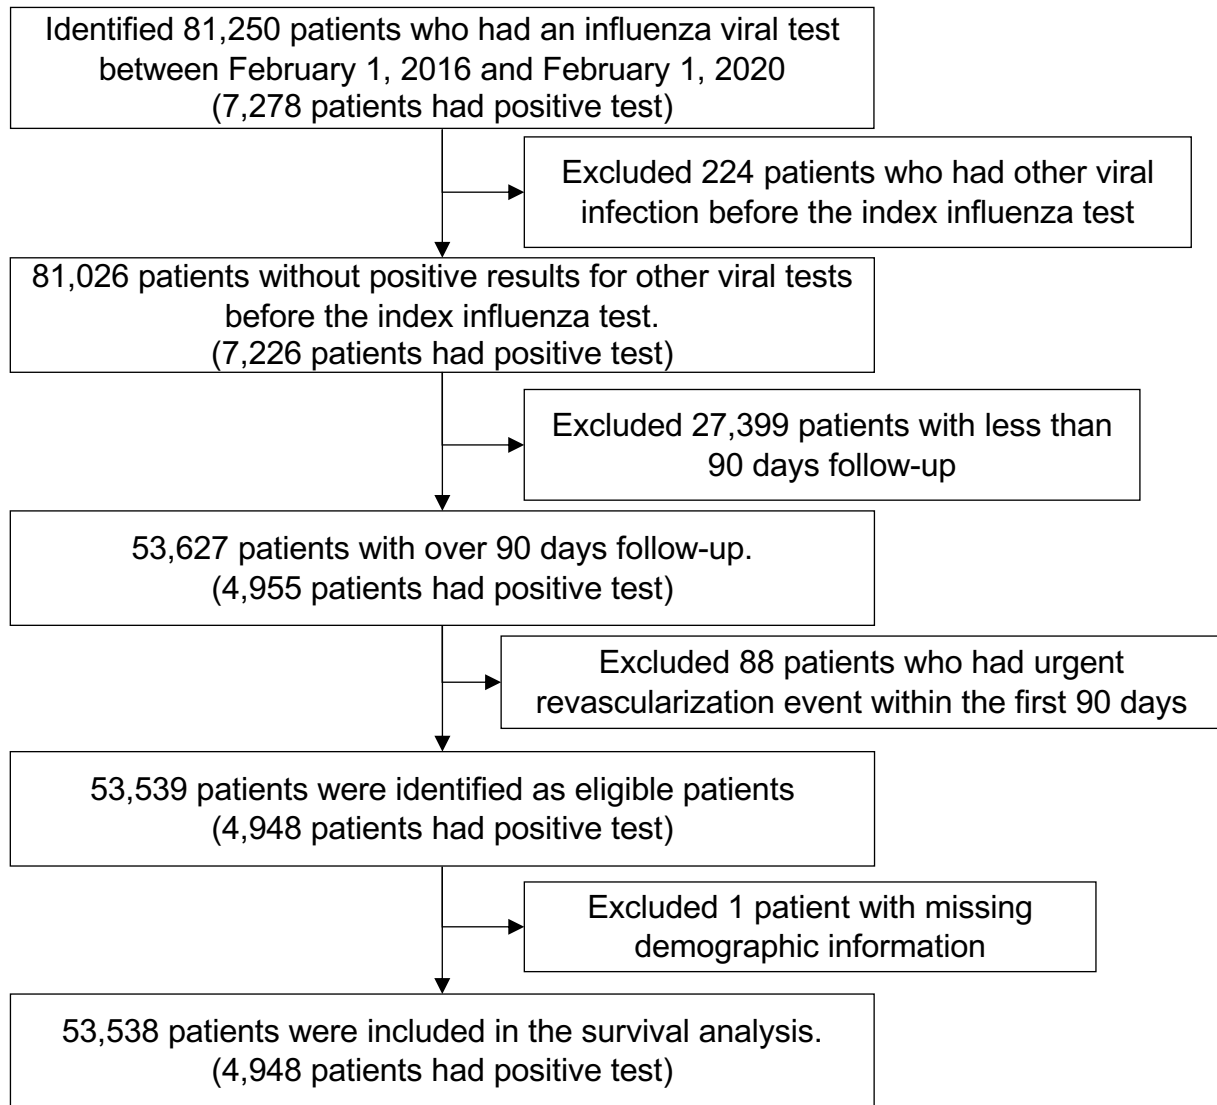

**Figure S16. Flow diagram of patient selection for survival analysis on urgent revascularization in patients undergoing influenza viral tests (excluding those who had event within the first 90 days).**

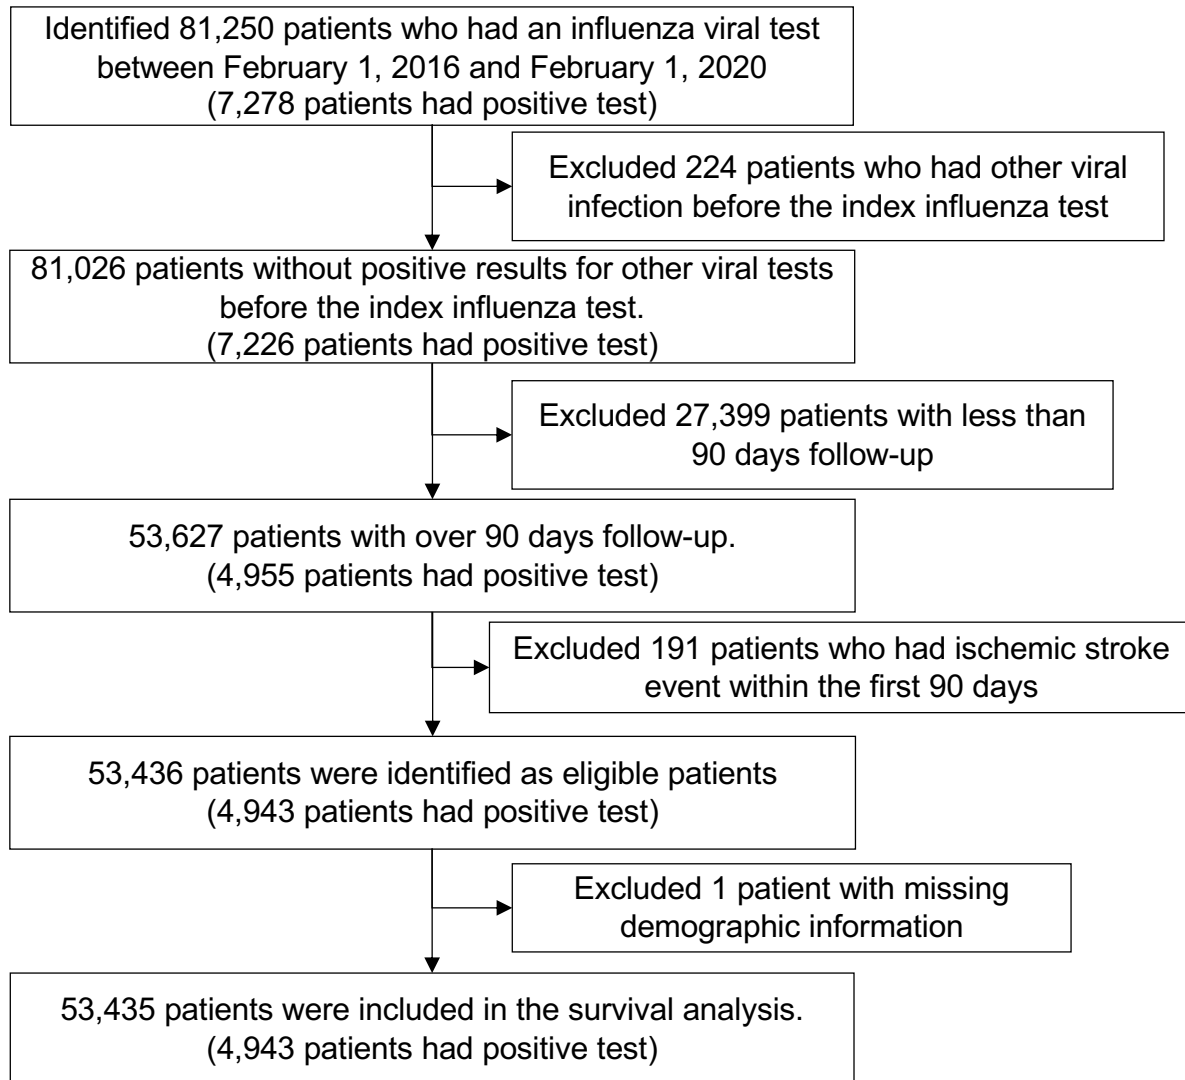

**Figure S17. Flow diagram of patient selection for survival analysis on ischemic stroke in patients undergoing influenza viral tests (excluding those who had event within the first 90 days).**

## Supplementary Tables

Table S1. Demographics for the notes used for training and testing event models

|                                              | Training dataset | Test dataset |
|----------------------------------------------|------------------|--------------|
| Numbers of notes                             | 1964             | 1003         |
| <b>Events</b>                                |                  |              |
| PCI/CABG, n (%)                              | 306 (15.6)       | 54 (5.4)     |
| ACS, n (%)                                   | 307 (15.6)       | 54 (5.4)     |
| Heart failure hospitalization, n (%)         | 328 (16.7)       | 122 (16.7)   |
| Ischemic stroke, n (%)                       | 318 (16.2)       | 59 (5.9)     |
| <b>Institutions</b>                          |                  |              |
| Brigham and Women's Hospital, n (%)          | 602 (30.7)       | 140 (14.0)   |
| Brigham and Women's Faulkner Hospital, n (%) | 121 (6.2)        | 110 (11.0)   |
| Massachusetts General Hospital, n (%)        | 632 (32.2)       | 529 (52.7)   |
| Cooley Dickinson Health Care, n (%)          | 43 (2.2)         | 0 (0.0)      |
| Martha's Vineyard Hospital, n (%)            | 6 (0.3)          | 0 (0.0)      |
| McLean Hospital, n (%)                       | 2 (0.1)          | 0 (0.0)      |
| Nantucket Cottage Hospital, n (%)            | 1 (0.1)          | 0 (0.0)      |
| Massachusetts Eye and Ear, n (%)             | 1 (0.1)          | 0 (0.0)      |
| Newton-Wellesley Hospital, n (%)             | 155 (7.9)        | 123 (12.3)   |
| North Shore Medical Center, n (%)            | 173 (8.8)        | 101 (10.1)   |
| South shore hospital, n (%)                  | 5 (0.3)          | 0 (0.0)      |



|                                                      |           |         |
|------------------------------------------------------|-----------|---------|
| Spaulding Hospital Cambridge, n (%)                  | 4 (0.2)   | 0 (0.0) |
| Spaulding Hospital North Shore, n (%)                | 4 (0.2)   | 0 (0.0) |
| Spaulding Nursing and Therapy Center Brighton, n (%) | 1 (0.1)   | 0 (0.0) |
| Spaulding Rehabilitation Hospital, n (%)             | 15 (0.8)  | 0 (0.0) |
| Union Hospital, n (%)                                | 1 (0.1)   | 0 (0.0) |
| Wentworth-Douglass Hospital, n (%)                   | 18 (0.9)  | 0 (0.0) |
| Unclear                                              | 180 (9.2) | 0 (0.0) |

---

**Table S2. Demographics for the notes used for training and testing history model**

|                                                      | Training dataset | Test dataset |
|------------------------------------------------------|------------------|--------------|
| Numbers of notes                                     | 819              | 366          |
| <b>HF history label</b>                              |                  |              |
| Yes, n (%)                                           | 181 (22.1)       | 82 (22.4)    |
| No, n (%)                                            | 371 (45.3)       | 171 (46.7)   |
| Ambiguous, n (%)                                     | 45 (5.5)         | 19 (5.2)     |
| Uninformative, n (%)                                 | 222 (27.1)       | 94 (25.7)    |
| <b>Institutions</b>                                  |                  |              |
| Brigham and Women's Hospital, n (%)                  | 422 (51.5)       | 189 (51.6)   |
| Brigham and Women's Faulkner Hospital, n (%)         | 37 (4.5)         | 12 (3.3)     |
| BWH Primary care Foxborough, n (%)                   | 24 (2.9)         | 11 (3.0)     |
| BWH Primary care Brookline, n (%)                    | 4 (0.5)          | 3 (0.8)      |
| BWH Primary care Norwood, n (%)                      | 2 (0.2)          | 1 (0.3)      |
| BWH Primary care Pembroke, n (%)                     | 0 (0.0)          | 1 (0.3)      |
| BWH at Newton Corner, n (%)                          | 4 (0.5)          | 4 (1.1)      |
| BWH Harbor Medical Associates, n (%)                 | 4 (0.5)          | 3 (0.8)      |
| Faulkner Community Physicians at Hyde Park, n (%)    | 3 (0.4)          | 0 (0.0)      |
| Faulkner Community Physicians at West Roxbury, n (%) | 3 (0.4)          | 4 (1.1)      |
| Massachusetts General Hospital, n (%)                | 102 (12.5)       | 37 (10.1)    |
| MGH West Medical Group, n (%)                        | 0 (0.0)          | 1 (0.3)      |

|                                                     |          |          |
|-----------------------------------------------------|----------|----------|
| MGH Danvers, n (%)                                  | 0 (0.0)  | 1 (0.3)  |
| MGH Waltham, n (%)                                  | 1 (0.1)  | 1 (0.3)  |
| MGH North Shore Center, n (%)                       | 1 (0.1)  | 0 (0.0)  |
| MGH Beacon Hill Primary Care, n (%)                 | 0 (0.0)  | 1 (0.3)  |
| MGH Downtown Primary Care, n (%)                    | 1 (0.1)  | 0 (0.0)  |
| MGB Urgent care, n (%)                              | 0 (0.0)  | 2 (0.5)  |
| Foxborough Health Care Center, n (%)                | 21 (2.6) | 14 (3.8) |
| Dana-Farber Cancer Institute, n (%)                 | 60 (7.3) | 22 (6.0) |
| Essex Neurological Associates, n (%)                | 2 (0.2)  | 0 (0.0)  |
| Lown Cardiovascular Group, n (%)                    | 1 (0.1)  | 0 (0.0)  |
| Cooley Dickinson Health Care, n (%)                 | 1 (0.1)  | 1 (0.3)  |
| Charles River Medical Associates, n (%)             | 12 (1.5) | 8 (2.2)  |
| Martha's Vineyard Hospital, n (%)                   | 2 (0.2)  | 1 (0.3)  |
| Milford Regional Physician Group, n (%)             | 1 (0.1)  | 1 (0.3)  |
| Nantucket Cottage Hospital, n (%)                   | 1 (0.1)  | 0 (0.0)  |
| Massachusetts Eye and Ear, n (%)                    | 9 (1.1)  | 5 (1.4)  |
| Newton-Wellesley Hospital, n (%)                    | 34 (4.2) | 13 (3.6) |
| North End Waterfront Health, n (%)                  | 2 (0.2)  | 0 (0.0)  |
| North Shore Medical Center, n (%)                   | 40 (4.9) | 15 (4.1) |
| Ophthalmic Consultants of Boston, n (%)             | 2 (0.2)  | 0 (0.0)  |
| Ophthalmic Consultants of Boston in Plymouth, n (%) | 1 (0.1)  | 0 (0.0)  |

|                                                     |         |         |
|-----------------------------------------------------|---------|---------|
| Ophthalmic Consultants of Boston in Yarmouth, n (%) | 2 (0.2) | 4 (1.1) |
| Peabody Podiatry, n (%)                             | 0 (0.0) | 2 (0.5) |
| Pentucket Medical Haverhill, n (%)                  | 1 (0.1) | 0 (0.0) |
| South shore hospital, n (%)                         | 2 (0.2) | 1 (0.3) |
| Spaulding Rehabilitation Hospital, n (%)            | 2 (0.2) | 1 (0.3) |
| Spaulding Hospital Cambridge, n (%)                 | 2 (0.2) | 1 (0.3) |
| Spaulding Hospital Braintree, n (%)                 | 1 (0.1) | 0 (0.0) |
| Spaulding Hospital Framingham, n (%)                | 1 (0.1) | 0 (0.0) |
| Spaulding Hospital Malden, n (%)                    | 0 (0.0) | 1 (0.3) |
| Spaulding Hospital Peabody, n (%)                   | 0 (0.0) | 3 (0.8) |
| Spaulding Hospital Salem, n (%)                     | 1 (0.1) | 0 (0.0) |
| Spaulding Hospital Wellesley, n (%)                 | 1 (0.1) | 0 (0.0) |
| Winchester Hospital, n (%)                          | 2 (0.2) | 0 (0.0) |
| Unclear                                             | 7 (0.9) | 2 (0.5) |

---

BWH: Brigham and Women's Hospital, MGH: Massachusetts General Hospital, MGB: Mass General Brigham.

**Table S3. Baseline characteristics for survival analysis of heart failure hospitalization stratified by RSV infection (unmatched)**

|                             | RSV positive    | RSV negative    | SMD   |
|-----------------------------|-----------------|-----------------|-------|
| Number patients             | 1531            | 33,525          |       |
| <b>Demographics</b>         |                 |                 |       |
| Age, years $\pm$ SD         | 64.6 $\pm$ 18.3 | 59.1 $\pm$ 19.3 | 0.292 |
| Gender, Male (%)            | 643 (42.0)      | 14,801 (44.1)   | 0.043 |
| History of Smoking, Yes (%) | 731 (47.7)      | 15,172 (45.3)   | 0.050 |
| Race                        |                 |                 | 0.085 |
| White, n (%)                | 1,143 (74.7)    | 23,942 (71.4)   |       |
| Black, n (%)                | 156 (10.2)      | 3,686 (11.0)    |       |
| Hispanic, n (%)             | 43 (2.8)        | 1,087 (3.2)     |       |
| Asian, n (%)                | 49 (3.2)        | 1,249 (3.7)     |       |
| Others, n (%)               | 107 (7.0)       | 2,530 (7.5)     |       |
| Unknown, n (%)              | 33 (2.2)        | 1,031 (3.1)     |       |
| <b>Disease history</b>      |                 |                 |       |
| Heart failure, n (%)        | 355 (23.2)      | 5,337 (15.9)    | 0.184 |
| CAD, n (%)                  | 361 (23.6)      | 5,693 (17.0)    | 0.165 |
| COPD, n (%)                 | 413 (27.0)      | 6,257 (18.7)    | 0.196 |
| Hyperlipidemia, n (%)       | 823 (53.8)      | 14,729 (43.9)   | 0.197 |
| Hypertension, n (%)         | 1,014 (66.2)    | 18,533 (55.3)   | 0.226 |
| Atrial fibrillation, n (%)  | 332 (21.7)      | 5,011 (14.9)    | 0.175 |

|                                    |            |               |       |
|------------------------------------|------------|---------------|-------|
| Type 2 DM, n (%)                   | 444 (29.0) | 7,809 (23.3)  | 0.130 |
| <b>Medication</b>                  |            |               |       |
| ASA, n (%)                         | 626 (40.9) | 11,879 (35.4) | 0.112 |
| P2Y <sub>12</sub> Inhibitor, n (%) | 74 (4.8)   | 1,510 (4.5)   | 0.016 |
| Statin                             | 718 (46.9) | 13,133 (39.2) | 0.156 |
| ACEi, n (%)                        | 300 (19.6) | 6,689 (20.0)  | 0.009 |
| ARB, n (%)                         | 215 (14.0) | 3,631 (10.8)  | 0.097 |
| Beta blocker, n (%)                | 654 (42.7) | 11,645 (34.7) | 0.164 |
| Loop diuretic, n (%)               | 445 (29.1) | 6,601 (19.7)  | 0.220 |
| MRA, n (%)                         | 71 (4.6)   | 1,313 (3.9)   | 0.036 |
| <b>Virus testing method</b>        |            |               |       |
| Method                             |            |               | 0.023 |
| A, n (%)                           | 784 (51.2) | 16,788 (50.1) |       |
| B, n (%)                           | 747 (48.8) | 16,737 (49.9) |       |

---

Abbreviations. SMD: standardized mean difference, CAD: coronary heart disease, COPD: chronic obstructive pulmonary disease, DM: diabetes mellitus, ASA: acetyl-salicylic acid, ACEi: angiotensin-converting enzyme inhibitor, ARB: angiotensin II receptor blocker, MRA: mineralocorticoid receptor antagonist

**Table S4. Baseline characteristics for survival analysis of urgent revascularization stratified by RSV infection (unmatched)**

|                             | RSV positive    | RSV negative    | SMD   |
|-----------------------------|-----------------|-----------------|-------|
| Number patients             | 1572            | 34,255          |       |
| <b>Demographics</b>         |                 |                 |       |
| Age, years $\pm$ SD         | 64.8 $\pm$ 18.2 | 59.4 $\pm$ 19.3 | 0.287 |
| Gender, Male (%)            | 660 (42.0)      | 15,152 (44.2)   | 0.045 |
| History of Smoking, Yes (%) | 758 (48.2)      | 15,583 (45.5)   | 0.055 |
| Race                        |                 |                 | 0.081 |
| White, n (%)                | 1,171 (74.5)    | 24,515 (71.6)   |       |
| Black, n (%)                | 163 (10.4)      | 3,761 (11.0)    |       |
| Hispanic, n (%)             | 43 (2.7)        | 1,103 (3.2)     |       |
| Asian, n (%)                | 49 (3.1)        | 1,268 (3.7)     |       |
| Others, n (%)               | 112 (7.1)       | 2,562 (7.5)     |       |
| Unknown, n (%)              | 34 (2.2)        | 1,046 (3.1)     |       |
| <b>Disease history</b>      |                 |                 |       |
| Heart failure, n (%)        | 386 (24.6)      | 5,834 (17.0)    | 0.186 |
| CAD, n (%)                  | 373 (23.7)      | 5,966 (17.4)    | 0.157 |
| COPD, n (%)                 | 430 (27.4)      | 6,522 (19.0)    | 0.198 |
| Hyperlipidemia, n (%)       | 853 (54.3)      | 15,202 (44.4)   | 0.199 |
| Hypertension, n (%)         | 1,050 (66.8)    | 19,144 (55.9)   | 0.225 |
| Atrial fibrillation, n (%)  | 350 (22.3)      | 5,365 (15.7)    | 0.169 |

|                                    |            |               |       |
|------------------------------------|------------|---------------|-------|
| Type 2 DM, n (%)                   | 461 (29.3) | 8,087 (23.6)  | 0.130 |
| <b>Medication</b>                  |            |               |       |
| ASA, n (%)                         | 652 (41.5) | 12,275 (35.8) | 0.116 |
| P2Y <sub>12</sub> Inhibitor, n (%) | 76 (4.8)   | 1,576 (4.6)   | 0.011 |
| Statin                             | 748 (47.6) | 13,574 (39.6) | 0.161 |
| ACEi, n (%)                        | 313 (19.9) | 6,900 (20.1)  | 0.006 |
| ARB, n (%)                         | 222 (14.1) | 3,772 (11.0)  | 0.094 |
| Beta blocker, n (%)                | 681 (43.3) | 12,139 (35.4) | 0.162 |
| Loop diuretic, n (%)               | 475 (30.2) | 7,090 (20.7)  | 0.220 |
| MRA, n (%)                         | 80 (5.1)   | 1,397 (4.1)   | 0.048 |
| <b>Virus testing method</b>        |            |               |       |
| Method                             |            |               | 0.026 |
| A, n (%)                           | 808 (51.4) | 17,159 (50.1) |       |
| B, n (%)                           | 764 (48.6) | 17,096 (49.9) |       |

---

Abbreviations. SMD: standardized mean difference, CAD: coronary heart disease, COPD: chronic obstructive pulmonary disease, DM: diabetes mellitus, ASA: acetyl-salicylic acid, ACEi: angiotensin-converting enzyme inhibitor, ARB: angiotensin II receptor blocker, MRA: mineralocorticoid receptor antagonist



**Table S5. Baseline characteristics for survival analysis of stroke stratified by RSV infection (unmatched)**

|                             | RSV positive    | RSV negative    | SMD   |
|-----------------------------|-----------------|-----------------|-------|
| Number patients             | 1570            | 34,208          |       |
| <b>Demographics</b>         |                 |                 |       |
| Age, years $\pm$ SD         | 64.8 $\pm$ 18.2 | 59.4 $\pm$ 19.3 | 0.288 |
| Gender, Male (%)            | 659 (42.0)      | 15,133 (44.2)   | 0.046 |
| History of Smoking, Yes (%) | 756 (48.2)      | 15,573 (45.5)   | 0.053 |
| Race                        |                 |                 | 0.079 |
| White, n (%)                | 1,169 (74.5)    | 24,494 (71.6)   |       |
| Black, n (%)                | 163 (10.4)      | 3,747 (11.0)    |       |
| Hispanic, n (%)             | 43 (2.7)        | 1,103 (3.2)     |       |
| Asian, n (%)                | 49 (3.1)        | 1,262 (3.7)     |       |
| Others, n (%)               | 112 (7.1)       | 2,561 (7.5)     |       |
| Unknown, n (%)              | 34 (2.2)        | 1,041 (3.0)     |       |
| <b>Disease history</b>      |                 |                 |       |
| Heart failure, n (%)        | 386 (24.6)      | 5,824 (17.0)    | 0.187 |
| CAD, n (%)                  | 374 (23.8)      | 5,977 (17.5)    | 0.157 |
| COPD, n (%)                 | 428 (27.3)      | 6,511 (19.0)    | 0.196 |
| Hyperlipidemia, n (%)       | 854 (54.4)      | 15,179 (44.4)   | 0.201 |
| Hypertension, n (%)         | 1,047 (66.7)    | 19,108 (55.9)   | 0.224 |
| Atrial fibrillation, n (%)  | 351 (22.4)      | 5,342 (15.6)    | 0.173 |

|                                    |            |               |       |
|------------------------------------|------------|---------------|-------|
| Type 2 DM, n (%)                   | 460 (29.3) | 8,069 (23.6)  | 0.130 |
| <b>Medication</b>                  |            |               |       |
| ASA, n (%)                         | 653 (41.6) | 12,256 (35.8) | 0.119 |
| P2Y <sub>12</sub> Inhibitor, n (%) | 76 (4.8)   | 1,571 (4.6)   | 0.012 |
| Statin                             | 749 (47.7) | 13,548 (39.6) | 0.164 |
| ACEi, n (%)                        | 311 (19.8) | 6,882 (20.1)  | 0.008 |
| ARB, n (%)                         | 222 (14.1) | 3,770 (11.0)  | 0.094 |
| Beta blocker, n (%)                | 681 (43.4) | 12,115 (35.4) | 0.163 |
| Loop diuretic, n (%)               | 474 (30.2) | 7,084 (20.7)  | 0.219 |
| MRA, n (%)                         | 80 (5.1)   | 1,399 (4.1)   | 0.048 |
| <b>Virus testing method</b>        |            |               |       |
| Method                             |            |               | 0.027 |
| A, n (%)                           | 808 (51.5) | 17,135 (50.1) |       |
| B, n (%)                           | 762 (48.5) | 17,073 (49.9) |       |

---

Abbreviations. SMD: standardized mean difference, CAD: coronary heart disease, COPD: chronic obstructive pulmonary disease, DM: diabetes mellitus, ASA: acetyl-salicylic acid, ACEi: angiotensin-converting enzyme inhibitor, ARB: angiotensin II receptor blocker, MRA: mineralocorticoid receptor antagonist

**Table S6. Baseline characteristics for survival analysis of heart failure hospitalization stratified by RSV infection (matched)**

|                             | RSV positive    | RSV negative    | SMD   |
|-----------------------------|-----------------|-----------------|-------|
| Number patients             | 1531            | 24,496          |       |
| <b>Demographics</b>         |                 |                 |       |
| Age, years $\pm$ SD         | 64.6 $\pm$ 18.3 | 64.2 $\pm$ 17.7 | 0.023 |
| Gender, Male (%)            | 643 (42.0)      | 10,445 (42.6)   | 0.013 |
| History of Smoking, Yes (%) | 731 (47.7)      | 11,524 (47.0)   | 0.014 |
| Race                        |                 |                 | 0.019 |
| White, n (%)                | 1,143 (74.7)    | 18,153 (74.1)   |       |
| Black, n (%)                | 156 (10.2)      | 2,571 (10.5)    |       |
| Hispanic, n (%)             | 43 (2.8)        | 716 (2.9)       |       |
| Asian, n (%)                | 49 (3.2)        | 795 (3.2)       |       |
| Others, n (%)               | 107 (7.0)       | 1,769 (7.2)     |       |
| Unknown, n (%)              | 33 (2.2)        | 492 (2.0)       |       |
| <b>Disease history</b>      |                 |                 |       |
| Heart failure, n (%)        | 355 (23.2)      | 5,030 (20.5)    | 0.064 |
| CAD, n (%)                  | 361 (23.6)      | 5,315 (21.7)    | 0.045 |
| COPD, n (%)                 | 413 (27.0)      | 5,947 (24.3)    | 0.062 |
| Hyperlipidemia, n (%)       | 823 (53.8)      | 12,933 (52.8)   | 0.019 |
| Hypertension, n (%)         | 1,014 (66.2)    | 16,043 (65.5)   | 0.016 |
| Atrial fibrillation, n (%)  | 332 (21.7)      | 4,746 (19.4)    | 0.057 |

|                                    |            |               |        |
|------------------------------------|------------|---------------|--------|
| Type 2 DM, n (%)                   | 444 (29.0) | 6,910 (28.2)  | 0.018  |
| <b>Medication</b>                  |            |               |        |
| ASA, n (%)                         | 626 (40.9) | 9,979 (40.7)  | 0.003  |
| P2Y <sub>12</sub> Inhibitor, n (%) | 74 (4.8)   | 1,224 (5.0)   | 0.008  |
| Statin                             | 718 (46.9) | 11,501 (47.0) | 0.001  |
| ACEi, n (%)                        | 300 (19.6) | 5,686 (23.2)  | 0.088  |
| ARB, n (%)                         | 215 (14.0) | 3,240 (13.2)  | 0.024  |
| Beta blocker, n (%)                | 654 (42.7) | 10,108 (41.3) | 0.029  |
| Loop diuretic, n (%)               | 445 (29.1) | 6,282 (25.6)  | 0.077  |
| MRA, n (%)                         | 71 (4.6)   | 1,168 (4.8)   | 0.006  |
| <b>Virus testing method</b>        |            |               |        |
| Method                             |            |               | <0.001 |
| A, n (%)                           | 784 (51.2) | 12,539 (51.2) |        |
| B, n (%)                           | 747 (48.8) | 11,957 (48.8) |        |

---

Abbreviations. SMD: standardized mean difference, CAD: coronary heart disease, COPD: chronic obstructive pulmonary disease, DM: diabetes mellitus, ASA: acetyl-salicylic acid, ACEi: angiotensin-converting enzyme inhibitor, ARB: angiotensin II receptor blocker, MRA: mineralocorticoid receptor antagonist

**Table S7. Baseline characteristics for survival analysis of urgent revascularization stratified by RSV infection (matched)**

|                             | RSV positive    | RSV negative    | SMD   |
|-----------------------------|-----------------|-----------------|-------|
| Number patients             | 1572            | 25,152          |       |
| <b>Demographics</b>         |                 |                 |       |
| Age, years $\pm$ SD         | 64.8 $\pm$ 18.2 | 64.4 $\pm$ 17.7 | 0.022 |
| Gender, Male (%)            | 660 (42.0)      | 10,670 (42.4)   | 0.009 |
| History of Smoking, Yes (%) | 758 (48.2)      | 12,039 (47.9)   | 0.007 |
| Race                        |                 |                 | 0.011 |
| White, n (%)                | 1,171 (74.5)    | 18,654 (74.2)   |       |
| Black, n (%)                | 163 (10.4)      | 2,666 (10.6)    |       |
| Hispanic, n (%)             | 43 (2.7)        | 673 (2.7)       |       |
| Asian, n (%)                | 49 (3.1)        | 793 (3.2)       |       |
| Others, n (%)               | 112 (7.1)       | 1,830 (7.3)     |       |
| Unknown, n (%)              | 34 (2.2)        | 536 (2.1)       |       |
| <b>Disease history</b>      |                 |                 |       |
| Heart failure, n (%)        | 386 (24.6)      | 5,450 (21.7)    | 0.069 |
| CAD, n (%)                  | 373 (23.7)      | 5,524 (22.0)    | 0.042 |
| COPD, n (%)                 | 430 (27.4)      | 6,210 (24.7)    | 0.061 |
| Hyperlipidemia, n (%)       | 853 (54.3)      | 13,399 (53.3)   | 0.020 |
| Hypertension, n (%)         | 1,050 (66.8)    | 16,623 (66.1)   | 0.015 |
| Atrial fibrillation, n (%)  | 350 (22.3)      | 5,060 (20.1)    | 0.053 |

|                                    |            |               |       |
|------------------------------------|------------|---------------|-------|
| Type 2 DM, n (%)                   | 461 (29.3) | 7,167 (28.5)  | 0.018 |
| <b>Medication</b>                  |            |               |       |
| ASA, n (%)                         | 652 (41.5) | 10,418 (41.4) | 0.001 |
| P2Y <sub>12</sub> Inhibitor, n (%) | 76 (4.8)   | 1,230 (4.9)   | 0.003 |
| Statin                             | 748 (47.6) | 11,928 (47.4) | 0.003 |
| ACEi, n (%)                        | 313 (19.9) | 5,880 (23.4)  | 0.084 |
| ARB, n (%)                         | 222 (14.1) | 3,354 (13.3)  | 0.023 |
| Beta blocker, n (%)                | 681 (43.3) | 10,558 (42.0) | 0.027 |
| Loop diuretic, n (%)               | 475 (30.2) | 6,759 (26.9)  | 0.074 |
| MRA, n (%)                         | 80 (5.1)   | 1,233 (4.9)   | 0.009 |
| <b>Virus testing method</b>        |            |               |       |
| Method                             |            |               | 0.002 |
| A, n (%)                           | 808 (51.4) | 12,901 (51.4) |       |
| B, n (%)                           | 764 (48.6) | 12,251 (48.6) |       |

---

Abbreviations. SMD: standardized mean difference, CAD: coronary heart disease, COPD: chronic obstructive pulmonary disease, DM: diabetes mellitus, ASA: acetyl-salicylic acid, ACEi: angiotensin-converting enzyme inhibitor, ARB: angiotensin II receptor blocker, MRA: mineralocorticoid receptor antagonist

**Table S8. Baseline characteristics for survival analysis of stroke stratified by RSV infection (matched)**

|                             | RSV positive    | RSV negative    | SMD   |
|-----------------------------|-----------------|-----------------|-------|
| Number patients             | 1570            | 25,120          |       |
| <b>Demographics</b>         |                 |                 |       |
| Age, years $\pm$ SD         | 64.8 $\pm$ 18.2 | 64.3 $\pm$ 17.8 | 0.025 |
| Gender, Male (%)            | 659 (42.0)      | 10,638 (42.3)   | 0.008 |
| History of Smoking, Yes (%) | 756 (48.2)      | 12,014 (47.8)   | 0.007 |
| Race                        |                 |                 | 0.015 |
| White, n (%)                | 1,169 (74.5)    | 18,621 (74.1)   |       |
| Black, n (%)                | 163 (10.4)      | 2,640 (10.5)    |       |
| Hispanic, n (%)             | 43 (2.7)        | 717 (2.9)       |       |
| Asian, n (%)                | 49 (3.1)        | 798 (3.2)       |       |
| Others, n (%)               | 112 (7.1)       | 1,836 (7.3)     |       |
| Unknown, n (%)              | 34 (2.2)        | 508 (2.0)       |       |
| <b>Disease history</b>      |                 |                 |       |
| Heart failure, n (%)        | 386 (24.6)      | 5,461 (21.7)    | 0.068 |
| CAD, n (%)                  | 374 (23.8)      | 5,576 (22.2)    | 0.039 |
| COPD, n (%)                 | 428 (27.3)      | 6,202 (24.7)    | 0.059 |
| Hyperlipidemia, n (%)       | 854 (54.4)      | 13,429 (53.5)   | 0.019 |
| Hypertension, n (%)         | 1,047 (66.7)    | 16,538 (65.8)   | 0.018 |
| Atrial fibrillation, n (%)  | 351 (22.4)      | 5,053 (20.1)    | 0.055 |

|                                    |            |               |       |
|------------------------------------|------------|---------------|-------|
| Type 2 DM, n (%)                   | 460 (29.3) | 7,161 (28.5)  | 0.017 |
| <b>Medication</b>                  |            |               |       |
| ASA, n (%)                         | 653 (41.6) | 10,413 (41.5) | 0.003 |
| P2Y <sub>12</sub> Inhibitor, n (%) | 76 (4.8)   | 1,279 (5.1)   | 0.012 |
| Statin                             | 749 (47.7) | 11,973 (47.7) | 0.001 |
| ACEi, n (%)                        | 311 (19.8) | 5,855 (23.3)  | 0.085 |
| ARB, n (%)                         | 222 (14.1) | 3,365 (13.4)  | 0.022 |
| Beta blocker, n (%)                | 681 (43.4) | 12,146 (48.4) | 0.022 |
| Loop diuretic, n (%)               | 474 (30.2) | 6,740 (26.8)  | 0.074 |
| MRA, n (%)                         | 80 (5.1)   | 1,233 (4.9)   | 0.009 |
| <b>Virus testing method</b>        |            |               |       |
| Method                             |            |               | 0.004 |
| A, n (%)                           | 808 (51.5) | 12,974 (51.9) |       |
| B, n (%)                           | 762 (48.5) | 12,146 (48.4) |       |

---

Abbreviations. SMD: standardized mean difference, CAD: coronary heart disease, COPD: chronic obstructive pulmonary disease, DM: diabetes mellitus, ASA: acetyl-salicylic acid, ACEi: angiotensin-converting enzyme inhibitor, ARB: angiotensin II receptor blocker, MRA: mineralocorticoid receptor antagonist



**Table S9. Baseline characteristics for survival analysis of heart failure stratified by RSV infection (with 90 days exclusion window, unmatched)**

|                             | RSV positive    | RSV negative    | SMD   |
|-----------------------------|-----------------|-----------------|-------|
| Number patients             | 1,263           | 28,588          |       |
| <b>Demographics</b>         |                 |                 |       |
| Age, years $\pm$ SD         | 64.1 $\pm$ 18.3 | 58.6 $\pm$ 19.2 | 0.294 |
| Gender, Male (%)            | 537 (42.5)      | 12,405 (43.4)   | 0.018 |
| History of Smoking, Yes (%) | 599 (47.4)      | 12,770 (44.7)   | 0.055 |
| Race                        |                 |                 | 0.117 |
| White, n (%)                | 953 (75.5)      | 20,254 (70.8)   |       |
| Black, n (%)                | 123 (9.7)       | 3,227 (11.3)    |       |
| Hispanic, n (%)             | 32 (2.5)        | 991 (3.5)       |       |
| Asian, n (%)                | 43 (3.4)        | 1,069 (3.7)     |       |
| Others, n (%)               | 87 (6.9)        | 2,178 (7.6)     |       |
| Unknown, n (%)              | 25 (2.0)        | 869 (3.0)       |       |
| <b>Disease history</b>      |                 |                 |       |
| Heart failure, n (%)        | 272 (21.5)      | 4,329 (15.1)    | 0.166 |
| CAD, n (%)                  | 271 (21.5)      | 4,805 (16.8)    | 0.118 |
| COPD, n (%)                 | 347 (27.5)      | 5,380 (18.8)    | 0.206 |
| Hyperlipidemia, n (%)       | 671 (53.1)      | 12,720 (44.5)   | 0.173 |

|                                    |            |               |       |
|------------------------------------|------------|---------------|-------|
| Hypertension, n (%)                | 837 (66.3) | 15,909 (55.6) | 0.219 |
| Atrial fibrillation, n (%)         | 257 (14.5) | 4,155 (14.5)  | 0.154 |
| Type 2 DM, n (%)                   | 351 (23.3) | 6,651 (23.3)  | 0.104 |
| <b>Medication</b>                  |            |               |       |
| ASA, n (%)                         | 500 (39.6) | 10,079 (35.3) | 0.090 |
| P2Y <sub>12</sub> Inhibitor, n (%) | 58 (4.6)   | 1,230 (4.3)   | 0.014 |
| Statin                             | 589 (46.6) | 11,043 (38.6) | 0.162 |
| ACEi, n (%)                        | 248 (19.6) | 5,715 (20.0)  | 0.009 |
| ARB, n (%)                         | 176 (13.9) | 3,106 (10.9)  | 0.093 |
| Beta blocker, n (%)                | 525 (41.6) | 9,701 (33.9)  | 0.158 |
| Loop diuretic, n (%)               | 336 (26.6) | 5,204 (18.2)  | 0.202 |
| MRA, n (%)                         | 54 (4.3)   | 1,033 (3.6)   | 0.034 |
| <b>Virus testing method</b>        |            |               |       |
| Method                             |            |               | 0.025 |
| A, n (%)                           | 652 (51.6) | 14,403 (50.4) |       |
| B, n (%)                           | 611 (48.4) | 14,185 (49.6) |       |

---

Abbreviations. SMD: standardized mean difference, CAD: coronary heart disease, COPD: chronic obstructive pulmonary disease, DM: diabetes mellitus, ASA: acetyl-salicylic acid, ACEi: angiotensin-converting enzyme inhibitor, ARB: angiotensin II receptor blocker, MRA: mineralocorticoid receptor antagonist

**Table S10. Baseline characteristics for survival analysis of urgent revascularization stratified by RSV infection (with 90 days exclusion window, unmatched)**

|                             | RSV positive    | RSV negative    | SMD   |
|-----------------------------|-----------------|-----------------|-------|
| Number patients             | 1,340           | 29,781          |       |
| <b>Demographics</b>         |                 |                 |       |
| Age, years $\pm$ SD         | 64.6 $\pm$ 18.2 | 59.1 $\pm$ 19.2 | 0.295 |
| Gender, Male (%)            | 568 (42.4)      | 13,001 (43.7)   | 0.026 |
| History of Smoking, Yes (%) | 645 (48.1)      | 13,438 (45.1)   | 0.060 |
| Race                        |                 |                 | 0.103 |
| White, n (%)                | 1,008 (75.2)    | 21,188 (71.1)   |       |
| Black, n (%)                | 134 (10.0)      | 3,356 (11.3)    |       |
| Hispanic, n (%)             | 33 (2.5)        | 1,017 (3.4)     |       |
| Asian, n (%)                | 43 (3.2)        | 1,097 (3.7)     |       |
| Others, n (%)               | 93 (6.9)        | 2,228 (7.5)     |       |
| Unknown, n (%)              | 29 (2.2)        | 895 (3.0)       |       |
| <b>Disease history</b>      |                 |                 |       |
| Heart failure, n (%)        | 342 (25.5)      | 5,230 (17.6)    | 0.195 |
| CAD, n (%)                  | 311 (23.2)      | 5,283 (17.7)    | 0.136 |
| COPD, n (%)                 | 381 (28.4)      | 5,819 (19.5)    | 0.209 |
| Hyperlipidemia, n (%)       | 732 (54.6)      | 13,531 (45.4)   | 0.185 |
| Hypertension, n (%)         | 909 (67.8)      | 16,947 (56.9)   | 0.227 |

|                                    |            |               |       |
|------------------------------------|------------|---------------|-------|
| Atrial fibrillation, n (%)         | 298 (22.2) | 4,739 (15.9)  | 0.162 |
| Type 2 DM, n (%)                   | 391 (23.3) | 7,178 (24.1)  | 0.115 |
| <b>Medication</b>                  |            |               |       |
| ASA, n (%)                         | 548 (40.9) | 10,748 (36.1) | 0.099 |
| P2Y <sub>12</sub> Inhibitor, n (%) | 61 (4.6)   | 1,347 (4.5)   | 0.001 |
| Statin                             | 647 (48.3) | 11,815 (39.7) | 0.174 |
| ACEi, n (%)                        | 271 (20.2) | 6,075 (20.4)  | 0.004 |
| ARB, n (%)                         | 193 (14.4) | 3,320 (11.1)  | 0.098 |
| Beta blocker, n (%)                | 583 (43.5) | 10,529 (35.4) | 0.167 |
| Loop diuretic, n (%)               | 403 (30.1) | 6,055 (20.3)  | 0.226 |
| MRA, n (%)                         | 69 (5.1)   | 1,199 (4.0)   | 0.054 |
| <b>Virus testing method</b>        |            |               |       |
| Method                             |            |               | 0.026 |
| A, n (%)                           | 693 (51.7) | 15,020 (50.4) |       |
| B, n (%)                           | 647 (48.3) | 14,761 (49.6) |       |

---

Abbreviations. SMD: standardized mean difference, CAD: coronary heart disease, COPD: chronic obstructive pulmonary disease, DM: diabetes mellitus, ASA: acetyl-salicylic acid, ACEi: angiotensin-converting enzyme inhibitor, ARB: angiotensin II receptor blocker, MRA: mineralocorticoid receptor antagonist

**Table S11. Baseline characteristics for survival analysis of ischemic stroke stratified by RSV infection (with 90 days exclusion window, unmatched)**

|                             | RSV positive    | RSV negative    | SMD   |
|-----------------------------|-----------------|-----------------|-------|
| Number patients             | 1,339           | 29,726          |       |
| <b>Demographics</b>         |                 |                 |       |
| Age, years $\pm$ SD         | 64.6 $\pm$ 18.2 | 59.1 $\pm$ 19.2 | 0.297 |
| Gender, Male (%)            | 569 (42.5)      | 12,981 (43.7)   | 0.024 |
| History of Smoking, Yes (%) | 644 (48.1)      | 13,426 (45.2)   | 0.059 |
| Race                        |                 |                 | 0.101 |
| White, n (%)                | 1,006 (75.1)    | 21,169 (71.2)   |       |
| Black, n (%)                | 135 (10.1)      | 3,333 (11.2)    |       |
| Hispanic, n (%)             | 33 (2.5)        | 1,017 (3.4)     |       |
| Asian, n (%)                | 43 (3.2)        | 1,090 (3.7)     |       |
| Others, n (%)               | 93 (6.9)        | 2,224 (7.5)     |       |
| Unknown, n (%)              | 29 (2.2)        | 893 (3.0)       |       |
| <b>Disease history</b>      |                 |                 |       |
| Heart failure, n (%)        | 343 (25.6)      | 5,217 (17.6)    | 0.197 |
| CAD, n (%)                  | 314 (23.5)      | 5,307 (17.9)    | 0.139 |
| COPD, n (%)                 | 379 (28.3)      | 5,812 (19.6)    | 0.206 |
| Hyperlipidemia, n (%)       | 735 (54.9)      | 13,509 (45.4)   | 0.190 |
| Hypertension, n (%)         | 907 (67.7)      | 16,903 (56.9)   | 0.226 |

|                                    |            |               |       |
|------------------------------------|------------|---------------|-------|
| Atrial fibrillation, n (%)         | 299 (22.3) | 4,713 (15.9)  | 0.165 |
| Type 2 DM, n (%)                   | 390 (29.1) | 7,146 (24.0)  | 0.115 |
| <b>Medication</b>                  |            |               |       |
| ASA, n (%)                         | 550 (41.1) | 10,729 (36.1) | 0.102 |
| P2Y <sub>12</sub> Inhibitor, n (%) | 63 (4.7)   | 1,346 (4.5)   | 0.008 |
| Statin                             | 650 (48.5) | 11,785 (39.6) | 0.180 |
| ACEi, n (%)                        | 269 (20.1) | 6,054 (20.4)  | 0.007 |
| ARB, n (%)                         | 193 (14.4) | 3,321 (11.1)  | 0.098 |
| Beta blocker, n (%)                | 584 (43.6) | 10,499 (35.3) | 0.170 |
| Loop diuretic, n (%)               | 402 (30.0) | 6,035 (20.3)  | 0.225 |
| MRA, n (%)                         | 69 (5.2)   | 1,197 (4.0)   | 0.054 |
| <b>Virus testing method</b>        |            |               |       |
| Method                             |            |               | 0.030 |
| A, n (%)                           | 695 (51.9) | 14,990 (50.4) |       |
| B, n (%)                           | 644 (48.1) | 14,736 (49.6) |       |

---

Abbreviations. SMD: standardized mean difference, CAD: coronary heart disease, COPD: chronic obstructive pulmonary disease, DM: diabetes mellitus, ASA: acetyl-salicylic acid, ACEi: angiotensin-converting enzyme inhibitor, ARB: angiotensin II receptor blocker, MRA: mineralocorticoid receptor antagonist

**Table S12. Baseline characteristics for survival analysis of heart failure stratified by RSV infection (with 90 days exclusion window, matched)**

|                             | RSV positive    | RSV negative    | SMD   |
|-----------------------------|-----------------|-----------------|-------|
| Number patients             | 1,263           | 20,208          |       |
| <b>Demographics</b>         |                 |                 |       |
| Age, years $\pm$ SD         | 64.1 $\pm$ 18.3 | 63.8 $\pm$ 17.8 | 0.017 |
| Gender, Male (%)            | 537 (42.5)      | 8,661 (42.9)    | 0.007 |
| History of Smoking, Yes (%) | 599 (47.4)      | 9,511 (47.1)    | 0.007 |
| Race                        |                 |                 | 0.012 |
| White, n (%)                | 953 (75.5)      | 15,224 (75.3)   |       |
| Black, n (%)                | 123 (9.7)       | 2,000 (9.9)     |       |
| Hispanic, n (%)             | 32 (2.5)        | 482 (2.4)       |       |
| Asian, n (%)                | 43 (3.4)        | 702 (3.5)       |       |
| Others, n (%)               | 87 (6.9)        | 1,391 (6.9)     |       |
| Unknown, n (%)              | 25 (2.0)        | 409 (2.0)       |       |
| <b>Disease history</b>      |                 |                 |       |
| Heart failure, n (%)        | 272 (21.5)      | 3,969 (19.6)    | 0.047 |
| CAD, n (%)                  | 271 (21.5)      | 4,202 (20.8)    | 0.016 |
| COPD, n (%)                 | 347 (27.5)      | 5,111 (25.3)    | 0.050 |
| Hyperlipidemia, n (%)       | 671 (53.1)      | 10,652 (52.7)   | 0.008 |
| Hypertension, n (%)         | 837 (66.3)      | 13,315 (65.9)   | 0.008 |

|                                    |            |               |       |
|------------------------------------|------------|---------------|-------|
| Atrial fibrillation, n (%)         | 257 (14.5) | 3,817 (18.9)  | 0.037 |
| Type 2 DM, n (%)                   | 351 (23.3) | 5,534 (27.4)  | 0.009 |
| <b>Medication</b>                  |            |               |       |
| ASA, n (%)                         | 500 (39.6) | 8,050 (39.8)  | 0.005 |
| P2Y <sub>12</sub> Inhibitor, n (%) | 58 (4.6)   | 947 (4.7)     | 0.004 |
| Statin                             | 589 (46.6) | 9,317 (46.1)  | 0.011 |
| ACEi, n (%)                        | 248 (19.6) | 4,669 (23.1)  | 0.085 |
| ARB, n (%)                         | 176 (13.9) | 2,669 (13.2)  | 0.021 |
| Beta blocker, n (%)                | 525 (41.6) | 8,105 (40.1)  | 0.030 |
| Loop diuretic, n (%)               | 336 (26.6) | 4,874 (24.1)  | 0.057 |
| MRA, n (%)                         | 54 (4.3)   | 861 (4.3)     | 0.001 |
| <b>Virus testing method</b>        |            |               |       |
| Method                             |            |               | 0.005 |
| A, n (%)                           | 652 (51.6) | 10,379 (51.4) |       |
| B, n (%)                           | 611 (48.4) | 9,829 (48.6)  |       |

---

Abbreviations. SMD: standardized mean difference, CAD: coronary heart disease, COPD: chronic obstructive pulmonary disease, DM: diabetes mellitus, ASA: acetyl-salicylic acid, ACEi: angiotensin-converting enzyme inhibitor, ARB: angiotensin II receptor blocker, MRA: mineralocorticoid receptor antagonist



**Table S13. Baseline characteristics for survival analysis of urgent revascularization stratified by RSV infection (with 90 days exclusion window, matched)**

|                             | RSV positive    | RSV negative    | SMD   |
|-----------------------------|-----------------|-----------------|-------|
| Number patients             | 1,340           | 21,440          |       |
| <b>Demographics</b>         |                 |                 |       |
| Age, years $\pm$ SD         | 64.6 $\pm$ 18.2 | 64.2 $\pm$ 17.7 | 0.022 |
| Gender, Male (%)            | 568 (42.4)      | 9,202 (42.9)    | 0.011 |
| History of Smoking, Yes (%) | 645 (48.1)      | 10,238 (47.8)   | 0.008 |
| Race                        |                 |                 | 0.011 |
| White, n (%)                | 1,008 (75.2)    | 16,094 (75.1)   |       |
| Black, n (%)                | 134 (10.0)      | 2,202 (10.3)    |       |
| Hispanic, n (%)             | 33 (2.5)        | 517 (2.4)       |       |
| Asian, n (%)                | 43 (3.2)        | 699 (3.3)       |       |
| Others, n (%)               | 93 (6.9)        | 1,474 (6.9)     |       |
| Unknown, n (%)              | 29 (2.2)        | 454 (2.1)       |       |
| <b>Disease history</b>      |                 |                 |       |
| Heart failure, n (%)        | 342 (25.5)      | 4,926 (23.0)    | 0.059 |
| CAD, n (%)                  | 311 (23.2)      | 4,736 (22.1)    | 0.027 |
| COPD, n (%)                 | 381 (28.4)      | 5,564 (26.0)    | 0.056 |
| Hyperlipidemia, n (%)       | 732 (54.6)      | 11,604 (54.1)   | 0.010 |
| Hypertension, n (%)         | 909 (67.8)      | 14,411 (67.2)   | 0.013 |

|                                    |            |               |       |
|------------------------------------|------------|---------------|-------|
| Atrial fibrillation, n (%)         | 298 (22.2) | 4,378 (20.4)  | 0.044 |
| Type 2 DM, n (%)                   | 391 (23.3) | 6,141 (28.6)  | 0.012 |
| <b>Medication</b>                  |            |               |       |
| ASA, n (%)                         | 548 (40.9) | 8,804 (41.1)  | 0.003 |
| P2Y <sub>12</sub> Inhibitor, n (%) | 61 (4.6)   | 1,013 (4.7)   | 0.008 |
| Statin                             | 647 (48.3) | 10,191 (47.5) | 0.015 |
| ACEi, n (%)                        | 271 (20.2) | 5,110 (23.8)  | 0.087 |
| ARB, n (%)                         | 193 (14.4) | 2,905 (13.5)  | 0.025 |
| Beta blocker, n (%)                | 583 (43.5) | 8,977 (41.9)  | 0.033 |
| Loop diuretic, n (%)               | 403 (30.1) | 6,055 (20.3)  | 0.226 |
| MRA, n (%)                         | 69 (5.1)   | 1,047 (4.9)   | 0.012 |
| <b>Virus testing method</b>        |            |               |       |
| Method                             |            |               | 0.001 |
| A, n (%)                           | 693 (51.7) | 11,100 (51.8) |       |
| B, n (%)                           | 647 (48.3) | 10,340 (48.2) |       |

---

Abbreviations. SMD: standardized mean difference, CAD: coronary heart disease, COPD: chronic obstructive pulmonary disease, DM: diabetes mellitus, ASA: acetyl-salicylic acid, ACEi: angiotensin-converting enzyme inhibitor, ARB: angiotensin II receptor blocker, MRA: mineralocorticoid receptor antagonist

**Table S14. Baseline characteristics for survival analysis of ischemic stroke stratified by RSV infection (with 90 days exclusion window, matched)**

|                             | RSV positive    | RSV negative    | SMD   |
|-----------------------------|-----------------|-----------------|-------|
| Number patients             | 1,339           | 21,424          |       |
| <b>Demographics</b>         |                 |                 |       |
| Age, years $\pm$ SD         | 64.6 $\pm$ 18.2 | 64.2 $\pm$ 17.7 | 0.024 |
| Gender, Male (%)            | 569 (42.5)      | 9,218 (43.0)    | 0.011 |
| History of Smoking, Yes (%) | 644 (48.1)      | 10,218 (47.7)   | 0.008 |
| Race                        |                 |                 | 0.008 |
| White, n (%)                | 1,006 (75.1)    | 16,117 (75.2)   |       |
| Black, n (%)                | 135 (10.1)      | 2,152 (10.0)    |       |
| Hispanic, n (%)             | 33 (2.5)        | 518 (2.4)       |       |
| Asian, n (%)                | 43 (3.2)        | 700 (3.3)       |       |
| Others, n (%)               | 93 (6.9)        | 1,492 (7.0)     |       |
| Unknown, n (%)              | 29 (2.2)        | 445 (2.1)       |       |
| <b>Disease history</b>      |                 |                 |       |
| Heart failure, n (%)        | 343 (25.6)      | 4,906 (22.9)    | 0.063 |
| CAD, n (%)                  | 314 (23.5)      | 4,813 (22.5)    | 0.023 |
| COPD, n (%)                 | 379 (28.3)      | 5,519 (25.8)    | 0.057 |
| Hyperlipidemia, n (%)       | 735 (54.9)      | 11,668 (54.5)   | 0.009 |
| Hypertension, n (%)         | 907 (67.7)      | 14,452 (67.5)   | 0.006 |

|                                    |            |               |       |
|------------------------------------|------------|---------------|-------|
| Atrial fibrillation, n (%)         | 299 (22.3) | 4,391 (20.5)  | 0.045 |
| Type 2 DM, n (%)                   | 390 (29.1) | 6,108 (28.5)  | 0.014 |
| <b>Medication</b>                  |            |               |       |
| ASA, n (%)                         | 550 (41.1) | 8,852 (41.3)  | 0.005 |
| P2Y <sub>12</sub> Inhibitor, n (%) | 63 (4.7)   | 1,045 (4.9)   | 0.008 |
| Statin                             | 650 (48.5) | 10,218 (47.7) | 0.017 |
| ACEi, n (%)                        | 269 (20.1) | 5,089 (23.8)  | 0.089 |
| ARB, n (%)                         | 193 (14.4) | 2,898 (13.5)  | 0.026 |
| Beta blocker, n (%)                | 584 (43.6) | 9,025 (42.1)  | 0.030 |
| Loop diuretic, n (%)               | 402 (30.0) | 5,749 (26.8)  | 0.071 |
| MRA, n (%)                         | 69 (5.2)   | 1,045 (4.9)   | 0.013 |
| <b>Virus testing method</b>        |            |               |       |
| Method                             |            |               | 0.001 |
| A, n (%)                           | 695 (51.9) | 11,135 (52.0) |       |
| B, n (%)                           | 644 (48.1) | 10,289 (48.0) |       |

---

Abbreviations. SMD: standardized mean difference, CAD: coronary heart disease, COPD: chronic obstructive pulmonary disease, DM: diabetes mellitus, ASA: acetyl-salicylic acid, ACEi: angiotensin-converting enzyme inhibitor, ARB: angiotensin II receptor blocker, MRA: mineralocorticoid receptor antagonist

**Table S15. Baseline characteristics for survival analysis of heart failure hospitalization stratified by influenza infection (unmatched)**

|                             | influenza positive | influenza negative | SMD   |
|-----------------------------|--------------------|--------------------|-------|
| Number patients             | 5138               | 53,384             |       |
| <b>Demographics</b>         |                    |                    |       |
| Age, years $\pm$ SD         | 55.2 $\pm$ 19.8    | 58.6 $\pm$ 19.5    | 0.172 |
| Gender, Male (%)            | 1,867 (36.3)       | 22,599 (42.3)      | 0.123 |
| History of Smoking, Yes (%) | 1,720 (33.5)       | 22,900 (42.9)      | 0.195 |
| Race                        |                    |                    | 0.084 |
| White, n (%)                | 3,702 (72.1)       | 39,644 (74.3)      |       |
| Black, n (%)                | 424 (8.3)          | 4,877 (9.1)        |       |
| Hispanic, n (%)             | 169 (3.3)          | 1,422 (2.7)        |       |
| Asian, n (%)                | 220 (4.3)          | 1,906 (3.6)        |       |
| Others, n (%)               | 420 (8.2)          | 3,833 (7.2)        |       |
| Unknown, n (%)              | 203 (4.0)          | 1,702 (3.2)        |       |
| <b>Disease history</b>      |                    |                    |       |
| Heart failure, n (%)        | 425 (8.3)          | 7,387 (13.8)       | 0.178 |
| CAD, n (%)                  | 541 (10.5)         | 8,086 (15.1)       | 0.138 |
| COPD, n (%)                 | 639 (12.4)         | 9,657 (18.1)       | 0.158 |
| Hyperlipidemia, n (%)       | 2,035 (39.6)       | 22,652 (42.4)      | 0.057 |
| Hypertension, n (%)         | 2,179 (42.4)       | 27,570 (51.6)      | 0.186 |
| Atrial fibrillation, n (%)  | 460 (9.0)          | 7,406 (13.9)       | 0.155 |

|                                    |              |               |       |
|------------------------------------|--------------|---------------|-------|
| Type 2 DM, n (%)                   | 864 (16.8)   | 11,210 (21.0) | 0.107 |
| <b>Medication</b>                  |              |               |       |
| ASA, n (%)                         | 1,326 (25.8) | 17,379 (32.6) | 0.149 |
| P2Y <sub>12</sub> Inhibitor, n (%) | 145 (2.8)    | 2,104 (3.9)   | 0.062 |
| Statin                             | 1,577 (30.7) | 19,265 (36.1) | 0.115 |
| ACEi, n (%)                        | 779 (15.2)   | 9,894 (18.5)  | 0.090 |
| ARB, n (%)                         | 451 (8.8)    | 5,462 (10.2)  | 0.050 |
| Beta blocker, n (%)                | 1137 (22.1)  | 16,798 (31.5) | 0.212 |
| Loop diuretic, n (%)               | 529 (10.3)   | 9,263 (17.4)  | 0.206 |
| MRA, n (%)                         | 117 (2.3)    | 1,840 (3.4)   | 0.070 |
| <b>Virus testing method</b>        |              |               |       |
| Method                             |              |               | 0.724 |
| A, n (%)                           | 3,133 (61.0) | 17,285 (32.4) |       |
| B, n (%)                           | 725 (14.1)   | 5,016 (9.4)   |       |
| C, n (%)                           | 720 (14.0)   | 16,196 (30.3) |       |
| D, n (%)                           | 560 (10.9)   | 14,887 (27.9) |       |

---

Abbreviations. SMD: standardized mean difference, CAD: coronary heart disease, COPD: chronic obstructive pulmonary disease, DM: diabetes mellitus, ASA: acetyl-salicylic acid, ACEi: angiotensin-converting enzyme inhibitor, ARB: angiotensin II receptor blocker, MRA: mineralocorticoid receptor antagonist

**Table S16. Baseline characteristics for survival analysis of urgent revascularization stratified by influenza infection (unmatched)**

|                             | influenza positive | influenza negative | SMD   |
|-----------------------------|--------------------|--------------------|-------|
| Number patients             | 5,176              | 54,418             |       |
| <b>Demographics</b>         |                    |                    |       |
| Age, years $\pm$ SD         | 55.4 $\pm$ 19.8    | 58.9 $\pm$ 19.6    | 0.177 |
| Gender, Male (%)            | 1,886 (36.4)       | 23,097 (42.4)      | 0.123 |
| History of Smoking, Yes (%) | 1,743 (33.7)       | 23,496 (43.2)      | 0.196 |
| Race                        |                    |                    | 0.087 |
| White, n (%)                | 3,733 (72.1)       | 40,475 (74.4)      |       |
| Black, n (%)                | 425 (8.2)          | 4,973 (9.1)        |       |
| Hispanic, n (%)             | 170 (3.3)          | 1,439 (2.6)        |       |
| Asian, n (%)                | 224 (4.3)          | 1,931 (3.5)        |       |
| Others, n (%)               | 420 (8.1)          | 3,876 (7.1)        |       |
| Unknown, n (%)              | 204 (3.9)          | 1,724 (3.2)        |       |
| <b>Disease history</b>      |                    |                    |       |
| Heart failure, n (%)        | 457 (8.8)          | 8,107 (14.9)       | 0.189 |
| CAD, n (%)                  | 560 (10.8)         | 8,481 (15.6)       | 0.141 |
| COPD, n (%)                 | 657 (12.4)         | 10,029 (18.4)      | 0.159 |
| Hyperlipidemia, n (%)       | 2,060 (39.8)       | 23,315 (42.8)      | 0.062 |
| Hypertension, n (%)         | 2,211 (42.7)       | 28,435 (52.3)      | 0.192 |
| Atrial fibrillation, n (%)  | 487 (9.4)          | 7,902 (14.5)       | 0.158 |

|                                    |              |               |       |
|------------------------------------|--------------|---------------|-------|
| Type 2 DM, n (%)                   | 881 (17.0)   | 11,613 (21.3) | 0.110 |
| <b>Medication</b>                  |              |               |       |
| ASA, n (%)                         | 1,353 (26.1) | 17,945 (33.0) | 0.150 |
| P2Y <sub>12</sub> Inhibitor, n (%) | 147 (2.8)    | 2,201 (4.0)   | 0.066 |
| Statin                             | 1,604 (31.0) | 19,891 (36.6) | 0.118 |
| ACEi, n (%)                        | 787 (15.2)   | 10,177 (18.7) | 0.093 |
| ARB, n (%)                         | 457 (8.8)    | 5,647 (10.4)  | 0.053 |
| Beta blocker, n (%)                | 1,164 (22.5) | 17,478 (32.1) | 0.217 |
| Loop diuretic, n (%)               | 561 (10.8)   | 9,950 (18.3)  | 0.212 |
| MRA, n (%)                         | 123 (2.4)    | 1,947 (3.6)   | 0.071 |
| <b>Virus testing method</b>        |              |               |       |
| Method                             |              |               | 0.728 |
| A, n (%)                           | 3,152 (60.9) | 17,486 (32.1) |       |
| B, n (%)                           | 726 (14.0)   | 5,039 (9.3)   |       |
| C, n (%)                           | 734 (14.2)   | 16,632 (30.6) |       |
| D, n (%)                           | 564 (10.9)   | 15,261 (28.0) |       |

---

Abbreviations. SMD: standardized mean difference, CAD: coronary heart disease, COPD: chronic obstructive pulmonary disease, DM: diabetes mellitus, ASA: acetyl-salicylic acid, ACEi: angiotensin-converting enzyme inhibitor, ARB: angiotensin II receptor blocker, MRA: mineralocorticoid receptor antagonist



**Table S17. Baseline characteristics for survival analysis of stroke stratified by influenza infection (unmatched)**

|                             | influenza positive | influenza negative | SMD   |
|-----------------------------|--------------------|--------------------|-------|
| Number patients             | 5,172              | 54,351             |       |
| <b>Demographics</b>         |                    |                    |       |
| Age, years $\pm$ SD         | 55.3 $\pm$ 19.8    | 58.8 $\pm$ 19.6    | 0.178 |
| Gender, Male (%)            | 1,885 (36.4)       | 23,077 (42.5)      | 0.123 |
| History of Smoking, Yes (%) | 1,742 (33.7)       | 23,479 (43.2)      | 0.197 |
| Race                        |                    |                    | 0.088 |
| White, n (%)                | 3,730 (72.1)       | 40,434 (74.4)      |       |
| Black, n (%)                | 424 (8.2)          | 4,959 (9.1)        |       |
| Hispanic, n (%)             | 170 (3.3)          | 1,440 (2.6)        |       |
| Asian, n (%)                | 224 (4.3)          | 1,924 (3.5)        |       |
| Others, n (%)               | 420 (8.1)          | 3,875 (7.1)        |       |
| Unknown, n (%)              | 204 (3.9)          | 1,719 (3.2)        |       |
| <b>Disease history</b>      |                    |                    |       |
| Heart failure, n (%)        | 456 (8.8)          | 8,095 (14.9)       | 0.189 |
| CAD, n (%)                  | 563 (10.9)         | 8,488 (15.6)       | 0.140 |
| COPD, n (%)                 | 658 (12.4)         | 10,009 (18.4)      | 0.158 |
| Hyperlipidemia, n (%)       | 2,059 (39.8)       | 23,281 (42.8)      | 0.061 |
| Hypertension, n (%)         | 2,207 (42.7)       | 28,385 (52.2)      | 0.192 |
| Atrial fibrillation, n (%)  | 485 (9.4)          | 7,876 (14.5)       | 0.158 |

|                                    |              |               |       |
|------------------------------------|--------------|---------------|-------|
| Type 2 DM, n (%)                   | 881 (17.0)   | 11,589 (21.3) | 0.109 |
| <b>Medication</b>                  |              |               |       |
| ASA, n (%)                         | 1,353 (26.2) | 17,913 (33.0) | 0.149 |
| P2Y <sub>12</sub> Inhibitor, n (%) | 147 (2.8)    | 2,191 (4.0)   | 0.065 |
| Statin                             | 1,601 (31.0) | 19,855 (36.5) | 0.118 |
| ACEi, n (%)                        | 787 (15.2)   | 10,151 (18.7) | 0.092 |
| ARB, n (%)                         | 456 (8.8)    | 5,639 (10.4)  | 0.053 |
| Beta blocker, n (%)                | 1,167 (22.6) | 17,443 (32.1) | 0.215 |
| Loop diuretic, n (%)               | 559 (10.8)   | 9,934 (18.3)  | 0.213 |
| MRA, n (%)                         | 122 (2.4)    | 1,951 (3.6)   | 0.072 |
| <b>Virus testing method</b>        |              |               |       |
| Method                             |              |               | 0.727 |
| A, n (%)                           | 3,149 (60.9) | 17,475 (32.2) |       |
| B, n (%)                           | 725 (14.0)   | 5,038 (9.3)   |       |
| C, n (%)                           | 733 (14.2)   | 16,602 (30.5) |       |
| D, n (%)                           | 565 (10.9)   | 15,236 (28.0) |       |

---

Abbreviations. SMD: standardized mean difference, CAD: coronary heart disease, COPD: chronic obstructive pulmonary disease, DM: diabetes mellitus, ASA: acetyl-salicylic acid, ACEi: angiotensin-converting enzyme inhibitor, ARB: angiotensin II receptor blocker, MRA: mineralocorticoid receptor antagonist

**Table S18. Baseline characteristics for survival analysis of heart failure hospitalization stratified by influenza infection (matched)**

|                             | influenza positive | influenza negative | SMD   |
|-----------------------------|--------------------|--------------------|-------|
| Number patients             | 5,138              | 25,690             |       |
| <b>Demographics</b>         |                    |                    |       |
| Age, years $\pm$ SD         | 55.2 $\pm$ 19.8    | 55.1 $\pm$ 19.6    | 0.007 |
| Gender, Male (%)            | 1,867 (36.3)       | 9,313 (36.3)       | 0.002 |
| History of Smoking, Yes (%) | 1,720 (33.5)       | 8,674 (33.8)       | 0.006 |
| Race                        |                    |                    | 0.021 |
| White, n (%)                | 3,702 (72.1)       | 18,559 (72.2)      |       |
| Black, n (%)                | 424 (8.3)          | 2,167 (8.4)        |       |
| Hispanic, n (%)             | 169 (3.3)          | 844 (3.3)          |       |
| Asian, n (%)                | 220 (4.3)          | 1,049 (4.1)        |       |
| Others, n (%)               | 420 (8.2)          | 2,137 (8.3)        |       |
| Unknown, n (%)              | 203 (4.0)          | 934 (3.6)          |       |
| <b>Disease history</b>      |                    |                    |       |
| Heart failure, n (%)        | 425 (8.3)          | 2,159 (8.4)        | 0.005 |
| CAD, n (%)                  | 541 (10.5)         | 2,719 (10.6)       | 0.002 |
| COPD, n (%)                 | 639 (12.4)         | 3,268 (12.7)       | 0.009 |
| Hyperlipidemia, n (%)       | 2,035 (39.6)       | 10,036 (39.1)      | 0.011 |
| Hypertension, n (%)         | 2,179 (42.4)       | 10,902 (42.4)      | 0.001 |
| Atrial fibrillation, n (%)  | 460 (9.0)          | 2,319 (9.0)        | 0.003 |

|                                    |              |               |       |
|------------------------------------|--------------|---------------|-------|
| Type 2 DM, n (%)                   | 864 (16.8)   | 4,376 (17.0)  | 0.006 |
| <b>Medication</b>                  |              |               |       |
| ASA, n (%)                         | 1,326 (25.8) | 6,608 (25.7)  | 0.002 |
| P2Y <sub>12</sub> Inhibitor, n (%) | 145 (2.8)    | 708 (2.8)     | 0.004 |
| Statin                             | 1,577 (30.7) | 7,562 (29.4)  | 0.027 |
| ACEi, n (%)                        | 779 (15.2)   | 3,931 (15.3)  | 0.004 |
| ARB, n (%)                         | 451 (8.8)    | 2,177 (8.5)   | 0.011 |
| Beta blocker, n (%)                | 1137 (22.1)  | 6,151 (23.9)  | 0.043 |
| Loop diuretic, n (%)               | 529 (10.3)   | 2,729 (10.3)  | 0.011 |
| MRA, n (%)                         | 117 (2.3)    | 653 (2.5)     | 0.017 |
| <b>Virus testing method</b>        |              |               |       |
| Method                             |              |               | 0.028 |
| A, n (%)                           | 3,133 (61.0) | 15,478 (60.2) |       |
| B, n (%)                           | 725 (14.1)   | 3,801 (14.8)  |       |
| C, n (%)                           | 720 (14.0)   | 3,729 (14.5)  |       |
| D, n (%)                           | 560 (10.9)   | 2,682 (10.4)  |       |

---

Abbreviations. SMD: standardized mean difference, CAD: coronary heart disease, COPD: chronic obstructive pulmonary disease, DM: diabetes mellitus, ASA: acetyl-salicylic acid, ACEi: angiotensin-converting enzyme inhibitor, ARB: angiotensin II receptor blocker, MRA: mineralocorticoid receptor antagonist

**Table S19. Baseline characteristics for survival analysis of urgent revascularization stratified by influenza infection (matched)**

|                             | influenza positive | influenza negative | SMD   |
|-----------------------------|--------------------|--------------------|-------|
| Number patients             | 5,176              | 25,880             |       |
| <b>Demographics</b>         |                    |                    |       |
| Age, years $\pm$ SD         | 55.4 $\pm$ 19.8    | 55.1 $\pm$ 19.7    | 0.013 |
| Gender, Male (%)            | 1,886 (36.4)       | 9,522 (36.8)       | 0.007 |
| History of Smoking, Yes (%) | 1,743 (33.7)       | 8,776 (33.9)       | 0.005 |
| Race                        |                    |                    | 0.017 |
| White, n (%)                | 3,733 (72.1)       | 18,703 (72.3)      |       |
| Black, n (%)                | 425 (8.2)          | 2,111 (8.2)        |       |
| Hispanic, n (%)             | 170 (3.3)          | 834 (3.2)          |       |
| Asian, n (%)                | 224 (4.3)          | 1,076 (4.2)        |       |
| Others, n (%)               | 420 (8.1)          | 2,184 (8.4)        |       |
| Unknown, n (%)              | 204 (3.9)          | 972 (3.8)          |       |
| <b>Disease history</b>      |                    |                    |       |
| Heart failure, n (%)        | 457 (8.8)          | 2,245 (8.7)        | 0.005 |
| CAD, n (%)                  | 560 (10.8)         | 2,782 (10.7)       | 0.002 |
| COPD, n (%)                 | 657 (12.4)         | 3,320 (12.8)       | 0.004 |
| Hyperlipidemia, n (%)       | 2,060 (39.8)       | 10,073 (38.9)      | 0.018 |
| Hypertension, n (%)         | 2,211 (42.7)       | 11,017 (42.6)      | 0.003 |
| Atrial fibrillation, n (%)  | 487 (9.4)          | 2,499 (9.7)        | 0.008 |

|                                    |              |               |       |
|------------------------------------|--------------|---------------|-------|
| Type 2 DM, n (%)                   | 881 (17.0)   | 4,386 (16.9)  | 0.002 |
| <b>Medication</b>                  |              |               |       |
| ASA, n (%)                         | 1,353 (26.1) | 6,792 (26.2)  | 0.002 |
| P2Y <sub>12</sub> Inhibitor, n (%) | 147 (2.8)    | 721 (2.8)     | 0.003 |
| Statin                             | 1,604 (31.0) | 7,740 (29.9)  | 0.024 |
| ACEi, n (%)                        | 787 (15.2)   | 3,920 (15.1)  | 0.002 |
| ARB, n (%)                         | 457 (8.8)    | 2,232 (8.6)   | 0.007 |
| Beta blocker, n (%)                | 1,164 (22.5) | 6,208 (24.0)  | 0.036 |
| Loop diuretic, n (%)               | 561 (10.8)   | 2,780 (10.7)  | 0.003 |
| MRA, n (%)                         | 123 (2.4)    | 643 (2.5)     | 0.007 |
| <b>Virus testing method</b>        |              |               |       |
| Method                             |              |               | 0.027 |
| A, n (%)                           | 3,152 (60.9) | 15,543 (60.1) |       |
| B, n (%)                           | 726 (14.0)   | 3,835 (14.8)  |       |
| C, n (%)                           | 734 (14.2)   | 3,757 (14.5)  |       |
| D, n (%)                           | 564 (10.9)   | 2,745 (10.6)  |       |

---

Abbreviations. SMD: standardized mean difference, CAD: coronary heart disease, COPD: chronic obstructive pulmonary disease, DM: diabetes mellitus, ASA: acetyl-salicylic acid, ACEi: angiotensin-converting enzyme inhibitor, ARB: angiotensin II receptor blocker, MRA: mineralocorticoid receptor antagonist

**Table S20. Baseline characteristics for survival analysis of stroke stratified by influenza infection (matched)**

|                             | influenza positive | influenza negative | SMD    |
|-----------------------------|--------------------|--------------------|--------|
| Number patients             | 5,172              | 25,860             |        |
| <b>Demographics</b>         |                    |                    |        |
| Age, years $\pm$ SD         | 55.3 $\pm$ 19.8    | 55.1 $\pm$ 19.7    | 0.011  |
| Gender, Male (%)            | 1,885 (36.4)       | 9,484 (36.7)       | 0.005  |
| History of Smoking, Yes (%) | 1,742 (33.7)       | 8,778 (33.9)       | 0.006  |
| Race                        |                    |                    | 0.023  |
| White, n (%)                | 3,730 (72.1)       | 18,688 (72.3)      |        |
| Black, n (%)                | 424 (8.2)          | 2,139 (8.3)        |        |
| Hispanic, n (%)             | 170 (3.3)          | 839 (3.2)          |        |
| Asian, n (%)                | 224 (4.3)          | 1,058 (4.1)        |        |
| Others, n (%)               | 420 (8.1)          | 2,192 (8.5)        |        |
| Unknown, n (%)              | 204 (3.9)          | 944 (3.7)          |        |
| <b>Disease history</b>      |                    |                    |        |
| Heart failure, n (%)        | 456 (8.8)          | 2,278 (8.8)        | <0.001 |
| CAD, n (%)                  | 563 (10.9)         | 2,814 (10.9)       | <0.001 |
| COPD, n (%)                 | 658 (12.4)         | 3,366 (13.0)       | 0.009  |
| Hyperlipidemia, n (%)       | 2,059 (39.8)       | 10,139 (39.8)      | 0.012  |
| Hypertension, n (%)         | 2,207 (42.7)       | 11,050 (42.7)      | 0.001  |
| Atrial fibrillation, n (%)  | 485 (9.4)          | 2,417 (9.3)        | 0.001  |

|                                    |              |               |       |
|------------------------------------|--------------|---------------|-------|
| Type 2 DM, n (%)                   | 881 (17.0)   | 881 (17.0)    | 0.003 |
| <b>Medication</b>                  |              |               |       |
| ASA, n (%)                         | 1,353 (26.2) | 6,777 (26.2)  | 0.001 |
| P2Y <sub>12</sub> Inhibitor, n (%) | 147 (2.8)    | 745 (2.9)     | 0.002 |
| Statin                             | 1,601 (31.0) | 7,704 (29.8)  | 0.025 |
| ACEi, n (%)                        | 787 (15.2)   | 3,966 (15.3)  | 0.003 |
| ARB, n (%)                         | 456 (8.8)    | 2,173 (8.4)   | 0.015 |
| Beta blocker, n (%)                | 1,167 (22.6) | 6,243 (24.1)  | 0.037 |
| Loop diuretic, n (%)               | 559 (10.8)   | 2,805 (10.8)  | 0.001 |
| MRA, n (%)                         | 122 (2.4)    | 683 (2.6)     | 0.018 |
| <b>Virus testing method</b>        |              |               |       |
| Method                             |              |               | 0.024 |
| A, n (%)                           | 3,149 (60.9) | 15,548 (60.1) |       |
| B, n (%)                           | 725 (14.0)   | 3,813 (14.7)  |       |
| C, n (%)                           | 733 (14.2)   | 3,741 (14.5)  |       |
| D, n (%)                           | 565 (10.9)   | 2,758 (10.7)  |       |

---

Abbreviations. SMD: standardized mean difference, CAD: coronary heart disease, COPD: chronic obstructive pulmonary disease, DM: diabetes mellitus, ASA: acetyl-salicylic acid, ACEi: angiotensin-converting enzyme inhibitor, ARB: angiotensin II receptor blocker, MRA: mineralocorticoid receptor antagonist



**Table S21. Baseline characteristics for survival analysis of heart failure stratified by influenza infection (with 90 days exclusion window, unmatched)**

|                             | influenza positive | influenza negative | SMD   |
|-----------------------------|--------------------|--------------------|-------|
| Number patients             | 4,877              | 46,856             |       |
| <b>Demographics</b>         |                    |                    |       |
| Age, years $\pm$ SD         | 55.1 $\pm$ 19.6    | 58.0 $\pm$ 19.4    | 0.145 |
| Gender, Male (%)            | 1,760 (36.1)       | 19,533 (41.7)      | 0.115 |
| History of Smoking, Yes (%) | 1,626 (33.3)       | 19,878 (42.4)      | 0.188 |
| Race                        |                    |                    | 0.078 |
| White, n (%)                | 3,517 (72.1)       | 34,621 (73.9)      |       |
| Black, n (%)                | 406 (8.3)          | 4,362 (9.3)        |       |
| Hispanic, n (%)             | 157 (3.2)          | 1,312 (2.8)        |       |
| Asian, n (%)                | 209 (4.3)          | 1,675 (3.6)        |       |
| Others, n (%)               | 396 (8.1)          | 3,421 (7.3)        |       |
| Unknown, n (%)              | 192 (3.9)          | 1,465 (3.1)        |       |
| <b>Disease history</b>      |                    |                    |       |
| Heart failure, n (%)        | 391 (8.0)          | 6,118 (13.1)       | 0.165 |
| CAD, n (%)                  | 527 (10.8)         | 7,003 (14.9)       | 0.124 |
| COPD, n (%)                 | 628 (12.9)         | 8,535 (18.2)       | 0.148 |
| Hyperlipidemia, n (%)       | 1,984 (40.7)       | 20,076 (42.8)      | 0.044 |

|                                    |              |               |       |
|------------------------------------|--------------|---------------|-------|
| Hypertension, n (%)                | 2,094 (42.9) | 24,185 (51.6) | 0.175 |
| Atrial fibrillation, n (%)         | 432 (8.9)    | 6,248 (13.3)  | 0.143 |
| Type 2 DM, n (%)                   | 822 (16.9)   | 9,727 (20.8)  | 0.100 |
| <b>Medication</b>                  |              |               |       |
| ASA, n (%)                         | 1,269 (26.0) | 15,062 (32.1) | 0.135 |
| P2Y <sub>12</sub> Inhibitor, n (%) | 137 (2.8)    | 1,756 (3.7)   | 0.053 |
| Statin                             | 1,506 (30.9) | 16,554 (35.3) | 0.095 |
| ACEi, n (%)                        | 744 (15.3)   | 8,642 (18.4)  | 0.085 |
| ARB, n (%)                         | 429 (8.8)    | 4,723 (10.1)  | 0.044 |
| Beta blocker, n (%)                | 1,067 (21.9) | 14,247 (30.4) | 0.195 |
| Loop diuretic, n (%)               | 478 (9.8)    | 7,450 (15.9)  | 0.183 |
| MRA, n (%)                         | 104 (2.1)    | 1,490 (3.2)   | 0.065 |
| <b>Virus testing method</b>        |              |               |       |
| Method                             |              |               | 0.694 |
| A, n (%)                           | 3,027 (62.1) | 16,119 (34.4) |       |
| B, n (%)                           | 696 (14.3)   | 4,748 (10.1)  |       |
| C, n (%)                           | 654 (13.4)   | 13,819 (29.5) |       |
| D, n (%)                           | 500 (10.3)   | 12,170 (26.0) |       |

---

Abbreviations. SMD: standardized mean difference, CAD: coronary heart disease, COPD: chronic obstructive pulmonary disease, DM: diabetes mellitus, ASA: acetyl-salicylic acid, ACEi: angiotensin-converting enzyme inhibitor, ARB: angiotensin II receptor blocker, MRA: mineralocorticoid receptor antagonist

**Table S22. Baseline characteristics for survival analysis of urgent revascularization stratified by influenza infection (with 90 days exclusion window, unmatched)**

|                             | influenza positive | influenza negative | SMD   |
|-----------------------------|--------------------|--------------------|-------|
| Number patients             | 4,948              | 48,590             |       |
| <b>Demographics</b>         |                    |                    |       |
| Age, years $\pm$ SD         | 55.5 $\pm$ 19.7    | 58.5 $\pm$ 19.5    | 0.155 |
| Gender, Male (%)            | 1,792 (36.2)       | 20,397 (42.0)      | 0.118 |
| History of Smoking, Yes (%) | 1,669 (33.7)       | 20,853 (42.9)      | 0.190 |
| Race                        |                    |                    | 0.084 |
| White, n (%)                | 3,569 (72.1)       | 36,019 (74.1)      |       |
| Black, n (%)                | 411 (8.3)          | 4,524 (9.3)        |       |
| Hispanic, n (%)             | 162 (3.3)          | 1,337 (2.8)        |       |
| Asian, n (%)                | 214 (4.3)          | 1,714 (3.5)        |       |
| Others, n (%)               | 398 (8.0)          | 3,492 (7.2)        |       |
| Unknown, n (%)              | 194 (3.9)          | 1,505 (3.1)        |       |
| <b>Disease history</b>      |                    |                    |       |
| Heart failure, n (%)        | 454 (9.2)          | 7,427 (15.3)       | 0.187 |
| CAD, n (%)                  | 559 (11.3)         | 7,710 (15.9)       | 0.134 |
| COPD, n (%)                 | 664 (13.4)         | 9,192 (18.9)       | 0.150 |
| Hyperlipidemia, n (%)       | 2,036 (41.1)       | 21,238 (43.7)      | 0.052 |

|                                    |              |               |       |
|------------------------------------|--------------|---------------|-------|
| Hypertension, n (%)                | 2,158 (43.6) | 25,688 (52.9) | 0.186 |
| Atrial fibrillation, n (%)         | 470 (9.5)    | 7,115 (14.6)  | 0.158 |
| Type 2 DM, n (%)                   | 862 (17.4)   | 10,492 (21.6) | 0.105 |
| <b>Medication</b>                  |              |               |       |
| ASA, n (%)                         | 1,316 (26.6) | 16,052 (33.0) | 0.141 |
| P2Y <sub>12</sub> Inhibitor, n (%) | 146 (3.0)    | 1,921 (4.0)   | 0.055 |
| Statin                             | 1,558 (31.5) | 17,659 (36.3) | 0.103 |
| ACEi, n (%)                        | 765 (15.5)   | 9,124 (18.8)  | 0.088 |
| ARB, n (%)                         | 442 (8.9)    | 5,040 (10.4)  | 0.049 |
| Beta blocker, n (%)                | 1,120 (22.6) | 15,434 (31.8) | 0.206 |
| Loop diuretic, n (%)               | 533 (10.8)   | 8,690 (17.9)  | 0.204 |
| MRA, n (%)                         | 114 (2.3)    | 1,716 (3.5)   | 0.073 |
| <b>Virus testing method</b>        |              |               |       |
| Method                             |              |               | 0.699 |
| A, n (%)                           | 3,058 (61.8) | 16,488 (33.9) |       |
| B, n (%)                           | 699 (14.1)   | 4,807 (9.9)   |       |
| C, n (%)                           | 675 (13.6)   | 14,527 (29.9) |       |
| D, n (%)                           | 516 (10.4)   | 12,768 (26.3) |       |

---

Abbreviations. SMD: standardized mean difference, CAD: coronary heart disease, COPD: chronic obstructive pulmonary disease, DM: diabetes mellitus, ASA: acetyl-salicylic acid, ACEi: angiotensin-converting enzyme inhibitor, ARB: angiotensin II receptor blocker, MRA: mineralocorticoid receptor antagonist

**Table S23. Baseline characteristics for survival analysis of ischemic stroke stratified by influenza infection (with 90 days exclusion window, unmatched)**

|                             | influenza positive | influenza negative | SMD   |
|-----------------------------|--------------------|--------------------|-------|
| Number patients             | 4,943              | 48,492             |       |
| <b>Demographics</b>         |                    |                    |       |
| Age, years $\pm$ SD         | 55.4 $\pm$ 19.6    | 58.5 $\pm$ 19.5    | 0.155 |
| Gender, Male (%)            | 1,791 (36.2)       | 20,359 (42.0)      | 0.118 |
| History of Smoking, Yes (%) | 1,666 (33.7)       | 20,814 (42.9)      | 0.190 |
| Race                        |                    |                    | 0.084 |
| White, n (%)                | 3,566 (72.1)       | 35,956 (74.1)      |       |
| Black, n (%)                | 410 (8.3)          | 4,500 (9.3)        |       |
| Hispanic, n (%)             | 162 (3.3)          | 1,338 (2.8)        |       |
| Asian, n (%)                | 214 (4.3)          | 1,705 (3.5)        |       |
| Others, n (%)               | 397 (8.0)          | 3,492 (7.2)        |       |
| Unknown, n (%)              | 194 (3.9)          | 1,501 (3.1)        |       |
| <b>Disease history</b>      |                    |                    |       |
| Heart failure, n (%)        | 453 (9.2)          | 7,398 (15.3)       | 0.187 |
| CAD, n (%)                  | 563 (11.4)         | 7,723 (15.9)       | 0.132 |
| COPD, n (%)                 | 663 (13.4)         | 9,161 (18.9)       | 0.149 |
| Hyperlipidemia, n (%)       | 2,035 (41.2)       | 21,192 (43.7)      | 0.051 |

|                                    |              |               |       |
|------------------------------------|--------------|---------------|-------|
| Hypertension, n (%)                | 2,153 (43.6) | 25,612 (52.8) | 0.186 |
| Atrial fibrillation, n (%)         | 471 (9.5)    | 7,072 (14.6)  | 0.156 |
| Type 2 DM, n (%)                   | 861 (17.4)   | 10,443 (21.5) | 0.104 |
| <b>Medication</b>                  |              |               |       |
| ASA, n (%)                         | 1,314 (26.6) | 16,009 (33.0) | 0.141 |
| P2Y <sub>12</sub> Inhibitor, n (%) | 146 (3.0)    | 1,912 (3.9)   | 0.054 |
| Statin                             | 1,555 (31.5) | 17,608 (36.3) | 0.103 |
| ACEi, n (%)                        | 761 (15.4)   | 9,091 (18.7)  | 0.089 |
| ARB, n (%)                         | 443 (9.0)    | 5,028 (10.4)  | 0.048 |
| Beta blocker, n (%)                | 1,120 (22.7) | 15,381 (31.7) | 0.205 |
| Loop diuretic, n (%)               | 531 (10.7)   | 8,649 (17.8)  | 0.204 |
| MRA, n (%)                         | 113 (2.3)    | 1,711 (3.5)   | 0.074 |
| <b>Virus testing method</b>        |              |               |       |
| Method                             |              |               | 0.698 |
| A, n (%)                           | 3,054 (61.8) | 16,465 (34.0) |       |
| B, n (%)                           | 699 (14.1)   | 4,800 (9.9)   |       |
| C, n (%)                           | 673 (13.6)   | 14,493 (29.9) |       |
| D, n (%)                           | 517 (10.5)   | 12,734 (26.3) |       |

---

Abbreviations. SMD: standardized mean difference, CAD: coronary heart disease, COPD: chronic obstructive pulmonary disease, DM: diabetes mellitus, ASA: acetyl-salicylic acid, ACEi: angiotensin-converting enzyme inhibitor, ARB: angiotensin II receptor blocker, MRA: mineralocorticoid receptor antagonist

**Table S24. Baseline characteristics for survival analysis of heart failure stratified by influenza infection (with 90 days exclusion window, matched)**

|                             | influenza positive | influenza negative | SMD   |
|-----------------------------|--------------------|--------------------|-------|
| Number patients             | 4,877              | 24,385             |       |
| <b>Demographics</b>         |                    |                    |       |
| Age, years $\pm$ SD         | 55.1 $\pm$ 19.6    | 55.2 $\pm$ 19.5    | 0.001 |
| Gender, Male (%)            | 1,760 (36.1)       | 8,952 (36.7)       | 0.013 |
| History of Smoking, Yes (%) | 1,626 (33.3)       | 8,426 (34.6)       | 0.026 |
| Race                        |                    |                    | 0.022 |
| White, n (%)                | 3,517 (72.1)       | 17,653 (72.4)      |       |
| Black, n (%)                | 406 (8.3)          | 2,093 (8.6)        |       |
| Hispanic, n (%)             | 157 (3.2)          | 764 (3.1)          |       |
| Asian, n (%)                | 209 (4.3)          | 983 (4.0)          |       |
| Others, n (%)               | 396 (8.1)          | 2,001 (8.2)        |       |
| Unknown, n (%)              | 192 (3.9)          | 891 (3.7)          |       |
| <b>Disease history</b>      |                    |                    |       |
| Heart failure, n (%)        | 391 (8.0)          | 2,029 (8.3)        | 0.011 |
| CAD, n (%)                  | 527 (10.8)         | 2,691 (11.0)       | 0.007 |
| COPD, n (%)                 | 628 (12.9)         | 3,176 (13.0)       | 0.004 |
| Hyperlipidemia, n (%)       | 1,984 (40.7)       | 9,774 (40.1)       | 0.012 |

|                                    |              |               |       |
|------------------------------------|--------------|---------------|-------|
| Hypertension, n (%)                | 2,094 (42.9) | 10,610 (43.5) | 0.012 |
| Atrial fibrillation, n (%)         | 432 (8.9)    | 2,215 (9.1)   | 0.008 |
| Type 2 DM, n (%)                   | 822 (16.9)   | 4,166 (17.1)  | 0.006 |
| <b>Medication</b>                  |              |               |       |
| ASA, n (%)                         | 1,269 (26.0) | 6,409 (26.3)  | 0.006 |
| P2Y <sub>12</sub> Inhibitor, n (%) | 137 (2.8)    | 672 (2.8)     | 0.003 |
| Statin                             | 1,506 (30.9) | 7,249 (29.7)  | 0.025 |
| ACEi, n (%)                        | 744 (15.3)   | 3,748 (15.4)  | 0.003 |
| ARB, n (%)                         | 429 (8.8)    | 2,132 (8.7)   | 0.002 |
| Beta blocker, n (%)                | 1,067 (21.9) | 5,853 (24.0)  | 0.051 |
| Loop diuretic, n (%)               | 478 (9.8)    | 2,434 (10.0)  | 0.006 |
| MRA, n (%)                         | 104 (2.1)    | 600 (2.5)     | 0.022 |
| <b>Virus testing method</b>        |              |               |       |
| Method                             |              |               | 0.023 |
| A, n (%)                           | 3,027 (62.1) | 14,941 (61.3) |       |
| B, n (%)                           | 696 (14.3)   | 3,662 (15.0)  |       |
| C, n (%)                           | 654 (13.4)   | 3,321 (13.6)  |       |
| D, n (%)                           | 500 (10.3)   | 2,461 (10.1)  |       |

---

Abbreviations. SMD: standardized mean difference, CAD: coronary heart disease, COPD: chronic obstructive pulmonary disease, DM: diabetes mellitus, ASA: acetyl-salicylic acid, ACEi: angiotensin-converting enzyme inhibitor, ARB: angiotensin II receptor blocker, MRA: mineralocorticoid receptor antagonist



**Table S25. Baseline characteristics for survival analysis of urgent revascularization stratified by influenza infection (with 90 days exclusion window, matched)**

|                             | influenza positive | influenza negative | SMD   |
|-----------------------------|--------------------|--------------------|-------|
| Number patients             | 4,948              | 24,740             |       |
| <b>Demographics</b>         |                    |                    |       |
| Age, years $\pm$ SD         | 55.5 $\pm$ 19.7    | 55.3 $\pm$ 19.5    | 0.006 |
| Gender, Male (%)            | 1,792 (36.2)       | 9,144 (37.0)       | 0.015 |
| History of Smoking, Yes (%) | 1,669 (33.7)       | 8,562 (34.6)       | 0.018 |
| Race                        |                    |                    | 0.027 |
| White, n (%)                | 3,569 (72.1)       | 17,904 (72.4)      |       |
| Black, n (%)                | 411 (8.3)          | 2,151 (8.7)        |       |
| Hispanic, n (%)             | 162 (3.3)          | 797 (3.2)          |       |
| Asian, n (%)                | 214 (4.3)          | 970 (3.9)          |       |
| Others, n (%)               | 398 (8.0)          | 2,007 (8.1)        |       |
| Unknown, n (%)              | 194 (3.9)          | 911 (3.7)          |       |
| <b>Disease history</b>      |                    |                    |       |
| Heart failure, n (%)        | 454 (9.2)          | 2,283 (9.2)        | 0.002 |
| CAD, n (%)                  | 559 (11.3)         | 2,788 (11.3)       | 0.001 |
| COPD, n (%)                 | 664 (13.4)         | 3,419 (13.8)       | 0.012 |
| Hyperlipidemia, n (%)       | 2,036 (41.1)       | 9,977 (40.3)       | 0.017 |

|                                    |              |               |        |
|------------------------------------|--------------|---------------|--------|
| Hypertension, n (%)                | 2,158 (43.6) | 10,805 (43.7) | 0.001  |
| Atrial fibrillation, n (%)         | 470 (9.5)    | 2,392 (9.7)   | 0.006  |
| Type 2 DM, n (%)                   | 862 (17.4)   | 4,280 (17.3)  | 0.003  |
| <b>Medication</b>                  |              |               |        |
| ASA, n (%)                         | 1,316 (26.6) | 6,596 (26.7)  | 0.001  |
| P2Y <sub>12</sub> Inhibitor, n (%) | 146 (3.0)    | 728 (2.9)     | <0.001 |
| Statin                             | 1,558 (31.5) | 7,478 (30.2)  | 0.027  |
| ACEi, n (%)                        | 765 (15.5)   | 3,847 (15.5)  | 0.002  |
| ARB, n (%)                         | 442 (8.9)    | 2,080 (8.4)   | 0.019  |
| Beta blocker, n (%)                | 1,120 (22.6) | 6,031 (24.4)  | 0.041  |
| Loop diuretic, n (%)               | 533 (10.8)   | 2,701 (10.9)  | 0.005  |
| MRA, n (%)                         | 114 (2.3)    | 627 (2.5)     | 0.015  |
| <b>Virus testing method</b>        |              |               |        |
| Method                             |              |               | 0.023  |
| A, n (%)                           | 3,058 (61.8) | 15,087 (61.0) |        |
| B, n (%)                           | 699 (14.1)   | 3,688 (14.9)  |        |
| C, n (%)                           | 675 (13.6)   | 3,407 (13.8)  |        |
| D, n (%)                           | 516 (10.4)   | 2,558 (10.3)  |        |

---

Abbreviations. SMD: standardized mean difference, CAD: coronary heart disease, COPD: chronic obstructive pulmonary disease, DM: diabetes mellitus, ASA: acetyl-salicylic acid, ACEi: angiotensin-converting enzyme inhibitor, ARB: angiotensin II receptor blocker, MRA: mineralocorticoid receptor antagonist

**Table S26. Baseline characteristics for survival analysis of ischemic stroke stratified by influenza infection (with 90 days exclusion window, matched)**

|                             | influenza positive | influenza negative | SMD   |
|-----------------------------|--------------------|--------------------|-------|
| Number patients             | 4,943              | 24,715             |       |
| <b>Demographics</b>         |                    |                    |       |
| Age, years $\pm$ SD         | 55.4 $\pm$ 19.6    | 55.4 $\pm$ 19.5    | 0.001 |
| Gender, Male (%)            | 1,791 (36.2)       | 9,126 (36.9)       | 0.014 |
| History of Smoking, Yes (%) | 1,666 (33.7)       | 8,550 (34.6)       | 0.019 |
| Race                        |                    |                    | 0.027 |
| White, n (%)                | 3,566 (72.1)       | 17,905 (72.4)      |       |
| Black, n (%)                | 410 (8.3)          | 2,116 (8.6)        |       |
| Hispanic, n (%)             | 162 (3.3)          | 799 (3.2)          |       |
| Asian, n (%)                | 214 (4.3)          | 988 (4.0)          |       |
| Others, n (%)               | 397 (8.0)          | 2,024 (8.2)        |       |
| Unknown, n (%)              | 194 (3.9)          | 883 (3.6)          |       |
| <b>Disease history</b>      |                    |                    |       |
| Heart failure, n (%)        | 453 (9.2)          | 2,249 (9.1)        | 0.002 |
| CAD, n (%)                  | 563 (11.4)         | 2,806 (11.4)       | 0.001 |
| COPD, n (%)                 | 663 (13.4)         | 3,396 (13.7)       | 0.010 |
| Hyperlipidemia, n (%)       | 2,035 (41.2)       | 10,059 (40.7)      | 0.010 |

|                                    |              |               |        |
|------------------------------------|--------------|---------------|--------|
| Hypertension, n (%)                | 2,153 (43.6) | 10,849 (43.9) | 0.007  |
| Atrial fibrillation, n (%)         | 471 (9.5)    | 2,432 (9.8)   | 0.011  |
| Type 2 DM, n (%)                   | 861 (17.4)   | 4,305 (17.4)  | <0.001 |
| <b>Medication</b>                  |              |               |        |
| ASA, n (%)                         | 1,314 (26.6) | 6,645 (26.9)  | 0.007  |
| P2Y <sub>12</sub> Inhibitor, n (%) | 146 (3.0)    | 721 (2.9)     | 0.002  |
| Statin                             | 1,555 (31.5) | 7,541 (30.5)  | 0.020  |
| ACEi, n (%)                        | 761 (15.4)   | 3,818 (15.4)  | 0.001  |
| ARB, n (%)                         | 443 (9.0)    | 2,181 (8.8)   | 0.005  |
| Beta blocker, n (%)                | 1,120 (22.7) | 5,987 (24.2)  | 0.037  |
| Loop diuretic, n (%)               | 531 (10.7)   | 2,671 (10.8)  | 0.002  |
| MRA, n (%)                         | 113 (2.3)    | 636 (2.6)     | 0.019  |
| <b>Virus testing method</b>        |              |               |        |
| Method                             |              |               | 0.027  |
| A, n (%)                           | 3,054 (61.8) | 15,035 (60.8) |        |
| B, n (%)                           | 699 (14.1)   | 3,720 (15.1)  |        |
| C, n (%)                           | 673 (13.6)   | 3,377 (13.7)  |        |
| D, n (%)                           | 517 (10.5)   | 2,583 (10.5)  |        |

---

Abbreviations. SMD: standardized mean difference, CAD: coronary heart disease, COPD: chronic obstructive pulmonary disease, DM: diabetes mellitus, ASA: acetyl-salicylic acid, ACEi: angiotensin-converting enzyme inhibitor, ARB: angiotensin II receptor blocker, MRA: mineralocorticoid receptor antagonist

**Table S26. History of heart failure based on the model with various cutoffs for heart failure hospitalization analysis on RSV infection (unmatched)**

|                                                | RSV positive | RSV negative  | SMD   |
|------------------------------------------------|--------------|---------------|-------|
| Number patients                                | 1531         | 33,525        |       |
| <b>Disease history</b>                         |              |               |       |
| Model based heart failure, n (%) cutoff = 0.24 | 846 (55.3)   | 15,327 (45.7) | 0.192 |
| Model based heart failure, n (%) cutoff = 0.41 | 744 (48.6)   | 13,141 (39.2) | 0.190 |
| Model based heart failure, n (%) cutoff = 0.43 | 381 (24.9)   | 5,484 (16.4)  | 0.212 |

**Table S27. Baseline characteristics for survival analysis of heart failure hospitalization stratified by RSV infection (matched, model-based heart failure history with cutoff 0.24)**

|                                    | RSV positive    | RSV negative    | SMD   |
|------------------------------------|-----------------|-----------------|-------|
| Number patients                    | 1531            | 24,496          |       |
| <b>Demographics</b>                |                 |                 |       |
| Age, years $\pm$ SD                | 64.6 $\pm$ 18.3 | 64.1 $\pm$ 17.7 | 0.026 |
| Gender, Male (%)                   | 643 (42.0)      | 10,438 (42.6)   | 0.012 |
| History of Smoking, Yes (%)        | 731 (47.7)      | 11,644 (47.5)   | 0.004 |
| Race                               |                 |                 | 0.013 |
| White, n (%)                       | 1,143 (74.7)    | 18,219 (74.4)   |       |
| Black, n (%)                       | 156 (10.2)      | 2,541 (10.4)    |       |
| Hispanic, n (%)                    | 43 (2.8)        | 679 (2.8)       |       |
| Asian, n (%)                       | 49 (3.2)        | 770 (3.1)       |       |
| Others, n (%)                      | 107 (7.0)       | 1,776 (7.3)     |       |
| Unknown, n (%)                     | 33 (2.2)        | 511 (2.1)       |       |
| <b>Disease history</b>             |                 |                 |       |
| Heart failure (model-based), n (%) | 846 (55.3)      | 13,099 (53.5)   | 0.036 |
| CAD, n (%)                         | 361 (23.6)      | 5,292 (21.6)    | 0.047 |

|                                    |              |               |        |
|------------------------------------|--------------|---------------|--------|
| COPD, n (%)                        | 413 (27.0)   | 5,963 (24.3)  | 0.060  |
| Hyperlipidemia, n (%)              | 823 (53.8)   | 12,880 (52.6) | 0.024  |
| Hypertension, n (%)                | 1,014 (66.2) | 15,967 (65.2) | 0.022  |
| Atrial fibrillation, n (%)         | 332 (21.7)   | 4,765 (19.5)  | 0.055  |
| Type 2 DM, n (%)                   | 444 (29.0)   | 6,890 (28.1)  | 0.019  |
| <b>Medication</b>                  |              |               |        |
| ASA, n (%)                         | 626 (40.9)   | 9,956 (40.6)  | 0.005  |
| P2Y <sub>12</sub> Inhibitor, n (%) | 74 (4.8)     | 1,205 (4.9)   | 0.004  |
| Statin                             | 718 (46.9)   | 11,484 (46.9) | <0.001 |
| ACEi, n (%)                        | 300 (19.6)   | 5,686 (23.2)  | 0.088  |
| ARB, n (%)                         | 215 (14.0)   | 3,192 (13.0)  | 0.030  |
| Beta blocker, n (%)                | 654 (42.7)   | 10,166 (41.5) | 0.025  |
| Loop diuretic, n (%)               | 445 (29.1)   | 6,288 (25.7)  | 0.076  |
| MRA, n (%)                         | 71 (4.6)     | 1,169 (4.8)   | 0.006  |
| <b>Virus testing method</b>        |              |               |        |
| Method                             |              |               | 0.004  |
| A, n (%)                           | 784 (51.2)   | 12,588 (51.4) |        |
| B, n (%)                           | 747 (48.8)   | 11,908 (48.6) |        |

---

Abbreviations. SMD: standardized mean difference, CAD: coronary heart disease, COPD: chronic obstructive pulmonary disease, DM: diabetes mellitus, ASA: acetyl-salicylic acid, ACEi: angiotensin-converting enzyme inhibitor, ARB: angiotensin II receptor blocker, MRA: mineralocorticoid receptor antagonist

**Table S28. Baseline characteristics for survival analysis of heart failure hospitalization stratified by RSV infection (matched, model-based heart failure history with cutoff 0.41)**

|                                    | RSV positive    | RSV negative    | SMD   |
|------------------------------------|-----------------|-----------------|-------|
| Number patients                    | 1531            | 24,496          |       |
| <b>Demographics</b>                |                 |                 |       |
| Age, years $\pm$ SD                | 64.6 $\pm$ 18.3 | 64.1 $\pm$ 17.7 | 0.026 |
| Gender, Male (%)                   | 643 (42.0)      | 10,450 (42.7)   | 0.013 |
| History of Smoking, Yes (%)        | 731 (47.7)      | 11,650 (47.6)   | 0.004 |
| Race                               |                 |                 | 0.009 |
| White, n (%)                       | 1,143 (74.7)    | 18,254 (74.5)   |       |
| Black, n (%)                       | 156 (10.2)      | 2,540 (10.4)    |       |
| Hispanic, n (%)                    | 43 (2.8)        | 695 (2.8)       |       |
| Asian, n (%)                       | 49 (3.2)        | 779 (3.2)       |       |
| Others, n (%)                      | 107 (7.0)       | 1,724 (7.0)     |       |
| Unknown, n (%)                     | 33 (2.2)        | 504 (2.1)       |       |
| <b>Disease history</b>             |                 |                 |       |
| Heart failure (model-based), n (%) | 744 (48.6)      | 11,355 (46.4)   | 0.045 |
| CAD, n (%)                         | 361 (23.6)      | 5,320 (21.7)    | 0.044 |



|                                    |              |               |       |
|------------------------------------|--------------|---------------|-------|
| COPD, n (%)                        | 413 (27.0)   | 5,981 (24.4)  | 0.059 |
| Hyperlipidemia, n (%)              | 823 (53.8)   | 12,929 (52.8) | 0.020 |
| Hypertension, n (%)                | 1,014 (66.2) | 16,005 (65.3) | 0.019 |
| Atrial fibrillation, n (%)         | 332 (21.7)   | 4,724 (19.3)  | 0.060 |
| Type 2 DM, n (%)                   | 444 (29.0)   | 6,871 (28.0)  | 0.021 |
| <b>Medication</b>                  |              |               |       |
| ASA, n (%)                         | 626 (40.9)   | 9,989 (40.8)  | 0.002 |
| P2Y <sub>12</sub> Inhibitor, n (%) | 74 (4.8)     | 1,211 (4.9)   | 0.005 |
| Statin                             | 718 (46.9)   | 11,538 (47.1) | 0.004 |
| ACEi, n (%)                        | 300 (19.6)   | 5,663 (23.1)  | 0.086 |
| ARB, n (%)                         | 215 (14.0)   | 3,212 (13.1)  | 0.027 |
| Beta blocker, n (%)                | 654 (42.7)   | 10,138 (41.4) | 0.027 |
| Loop diuretic, n (%)               | 445 (29.1)   | 6,263 (25.6)  | 0.079 |
| MRA, n (%)                         | 71 (4.6)     | 1,165 (4.8)   | 0.006 |
| <b>Virus testing method</b>        |              |               |       |
| Method                             |              |               | 0.005 |
| A, n (%)                           | 784 (51.2)   | 12,601 (51.2) |       |
| B, n (%)                           | 747 (48.8)   | 11,895 (48.8) |       |

---

Abbreviations. SMD: standardized mean difference, CAD: coronary heart disease, COPD: chronic obstructive pulmonary disease, DM: diabetes mellitus, ASA: acetyl-salicylic acid, ACEi: angiotensin-converting enzyme inhibitor, ARB: angiotensin II receptor blocker, MRA: mineralocorticoid receptor antagonist

**Table S29. Baseline characteristics for survival analysis of heart failure hospitalization stratified by RSV infection (matched, model-based heart failure history with cutoff 0.43)**

|                                    | RSV positive    | RSV negative    | SMD   |
|------------------------------------|-----------------|-----------------|-------|
| Number patients                    | 1531            | 24,496          |       |
| <b>Demographics</b>                |                 |                 |       |
| Age, years $\pm$ SD                | 64.6 $\pm$ 18.3 | 64.1 $\pm$ 17.7 | 0.028 |
| Gender, Male (%)                   | 643 (42.0)      | 10,368 (42.3)   | 0.007 |
| History of Smoking, Yes (%)        | 731 (47.7)      | 11,560 (47.2)   | 0.011 |
| Race                               |                 |                 | 0.012 |
| White, n (%)                       | 1,143 (74.7)    | 18,188 (74.2)   |       |
| Black, n (%)                       | 156 (10.2)      | 2,508 (10.2)    |       |
| Hispanic, n (%)                    | 43 (2.8)        | 717 (2.9)       |       |
| Asian, n (%)                       | 49 (3.2)        | 812 (3.3)       |       |
| Others, n (%)                      | 107 (7.0)       | 1,750 (7.1)     |       |
| Unknown, n (%)                     | 33 (2.2)        | 521 (2.1)       |       |
| <b>Disease history</b>             |                 |                 |       |
| Heart failure (model-based), n (%) | 381 (24.9)      | 5,232 (21.4)    | 0.084 |
| CAD, n (%)                         | 361 (23.6)      | 5,258 (21.5)    | 0.051 |

|                                    |              |               |        |
|------------------------------------|--------------|---------------|--------|
| COPD, n (%)                        | 413 (27.0)   | 5,928 (24.2)  | 0.064  |
| Hyperlipidemia, n (%)              | 823 (53.8)   | 12,870 (52.5) | 0.024  |
| Hypertension, n (%)                | 1,014 (66.2) | 16,028 (65.4) | 0.017  |
| Atrial fibrillation, n (%)         | 332 (21.7)   | 4,730 (19.3)  | 0.059  |
| Type 2 DM, n (%)                   | 444 (29.0)   | 6,587 (28.0)  | 0.022  |
| <b>Medication</b>                  |              |               |        |
| ASA, n (%)                         | 626 (40.9)   | 9,936 (40.6)  | 0.007  |
| P2Y <sub>12</sub> Inhibitor, n (%) | 74 (4.8)     | 1,213 (5.0)   | 0.005  |
| Statin                             | 718 (46.9)   | 11,488 (46.9) | <0.001 |
| ACEi, n (%)                        | 300 (19.6)   | 5,676 (23.2)  | 0.087  |
| ARB, n (%)                         | 215 (14.0)   | 3,213 (13.1)  | 0.027  |
| Beta blocker, n (%)                | 654 (42.7)   | 10,118 (41.3) | 0.029  |
| Loop diuretic, n (%)               | 445 (29.1)   | 6,246 (25.5)  | 0.080  |
| MRA, n (%)                         | 71 (4.6)     | 1,154 (4.7)   | 0.003  |
| <b>Virus testing method</b>        |              |               |        |
| Method                             |              |               | 0.006  |
| A, n (%)                           | 784 (51.2)   | 12,623 (51.5) |        |
| B, n (%)                           | 747 (48.8)   | 11,873 (48.5) |        |

---

Abbreviations. SMD: standardized mean difference, CAD: coronary heart disease, COPD: chronic obstructive pulmonary disease, DM: diabetes mellitus, ASA: acetyl-salicylic acid, ACEi: angiotensin-converting enzyme inhibitor, ARB: angiotensin II receptor blocker, MRA: mineralocorticoid receptor antagonist

**Table S30. Baseline characteristics for survival analysis of heart failure hospitalization stratified by influenza infection (matched, model-based heart failure history with cutoff 0.24)**

|                                    | influenza positive | influenza negative | SMD   |
|------------------------------------|--------------------|--------------------|-------|
| Number patients                    | 5138               | 25,690             |       |
| <b>Demographics</b>                |                    |                    |       |
| Age, years $\pm$ SD                | 55.2 $\pm$ 19.8    | 55.2 $\pm$ 19.6    | 0.002 |
| Gender, Male (%)                   | 1,867 (36.3)       | 9,482 (36.9)       | 0.012 |
| History of Smoking, Yes (%)        | 1,720 (33.5)       | 8,839 (34.4)       | 0.020 |
| Race                               |                    |                    | 0.022 |
| White, n (%)                       | 3,702 (72.1)       | 18,553 (72.2)      |       |
| Black, n (%)                       | 424 (8.3)          | 2,166 (8.4)        |       |
| Hispanic, n (%)                    | 169 (3.3)          | 821 (3.2)          |       |
| Asian, n (%)                       | 220 (4.3)          | 1,042 (4.1)        |       |
| Others, n (%)                      | 420 (8.2)          | 2,167 (8.4)        |       |
| Unknown, n (%)                     | 203 (4.0)          | 941 (3.7)          |       |
| <b>Disease history</b>             |                    |                    |       |
| Heart failure (model-based), n (%) | 1,161 (22.6)       | 5,774 (22.5)       | 0.003 |
| CAD, n (%)                         | 541 (10.5)         | 2,750 (10.7)       | 0.006 |
| COPD, n (%)                        | 639 (12.4)         | 3,328 (13.0)       | 0.016 |
| Hyperlipidemia, n (%)              | 2,035 (39.6)       | 10,091 (39.3)      | 0.007 |

|                                    |              |               |       |
|------------------------------------|--------------|---------------|-------|
| Hypertension, n (%)                | 2,179 (42.4) | 11,042 (43.0) | 0.012 |
| Atrial fibrillation, n (%)         | 460 (9.0)    | 2,332 (9.1)   | 0.004 |
| Type 2 DM, n (%)                   | 864 (16.8)   | 4,335 (16.9)  | 0.002 |
| <b>Medication</b>                  |              |               |       |
| ASA, n (%)                         | 1,326 (25.8) | 6,764 (26.3)  | 0.012 |
| P2Y <sub>12</sub> Inhibitor, n (%) | 145 (2.8)    | 772 (3.0)     | 0.011 |
| Statin                             | 1,577 (30.7) | 7,691 (29.9)  | 0.016 |
| ACEi, n (%)                        | 779 (15.2)   | 3,962 (15.4)  | 0.007 |
| ARB, n (%)                         | 451 (8.8)    | 2,234 (8.7)   | 0.003 |
| Beta blocker, n (%)                | 1137 (22.1)  | 6,073 (23.6)  | 0.036 |
| Loop diuretic, n (%)               | 529 (10.3)   | 2,710 (10.5)  | 0.008 |
| MRA, n (%)                         | 117 (2.3)    | 632 (2.5)     | 0.012 |
| <b>Virus testing method</b>        |              |               |       |
| Method                             |              |               | 0.039 |
| A, n (%)                           | 3,133 (61.0) | 15,312 (59.6) |       |
| B, n (%)                           | 725 (14.1)   | 3,955 (15.4)  |       |
| C, n (%)                           | 720 (14.0)   | 3,659 (14.2)  |       |
| D, n (%)                           | 560 (10.9)   | 2,764 (10.8)  |       |

---

Abbreviations. SMD: standardized mean difference, CAD: coronary heart disease, COPD: chronic obstructive pulmonary disease, DM: diabetes mellitus, ASA: acetyl-salicylic acid, ACEi: angiotensin-converting enzyme inhibitor, ARB: angiotensin II receptor blocker, MRA: mineralocorticoid receptor antagonist

**Table S31. Baseline characteristics for survival analysis of heart failure hospitalization stratified by influenza infection (matched, model-based heart failure history with cutoff 0.41)**

|                                    | influenza positive | influenza negative | SMD   |
|------------------------------------|--------------------|--------------------|-------|
| Number patients                    | 5138               | 25,690             |       |
| <b>Demographics</b>                |                    |                    |       |
| Age, years $\pm$ SD                | 55.2 $\pm$ 19.8    | 55.1 $\pm$ 19.6    | 0.005 |
| Gender, Male (%)                   | 1,867 (36.3)       | 9,427 (36.7)       | 0.007 |
| History of Smoking, Yes (%)        | 1,720 (33.5)       | 8,864 (34.5)       | 0.022 |
| Race                               |                    |                    | 0.022 |
| White, n (%)                       | 3,702 (72.1)       | 18,603 (72.4)      |       |
| Black, n (%)                       | 424 (8.3)          | 2,151 (8.4)        |       |
| Hispanic, n (%)                    | 169 (3.3)          | 818 (3.2)          |       |
| Asian, n (%)                       | 220 (4.3)          | 1,041 (4.1)        |       |
| Others, n (%)                      | 420 (8.2)          | 2,140 (8.3)        |       |
| Unknown, n (%)                     | 203 (4.0)          | 937 (3.6)          |       |
| <b>Disease history</b>             |                    |                    |       |
| Heart failure (model-based), n (%) | 972 (18.9)         | 4,793 (18.7)       | 0.007 |
| CAD, n (%)                         | 541 (10.5)         | 2,631 (10.2)       | 0.009 |
| COPD, n (%)                        | 639 (12.4)         | 3,332 (13.0)       | 0.016 |
| Hyperlipidemia, n (%)              | 2,035 (39.6)       | 9,953 (38.7)       | 0.018 |

|                                    |              |               |       |
|------------------------------------|--------------|---------------|-------|
| Hypertension, n (%)                | 2,179 (42.4) | 10,923 (42.5) | 0.002 |
| Atrial fibrillation, n (%)         | 460 (9.0)    | 2,294 (8.9)   | 0.001 |
| Type 2 DM, n (%)                   | 864 (16.8)   | 4,208 (16.4)  | 0.012 |
| <b>Medication</b>                  |              |               |       |
| ASA, n (%)                         | 1,326 (25.8) | 6,595 (25.7)  | 0.003 |
| P2Y <sub>12</sub> Inhibitor, n (%) | 145 (2.8)    | 688 (2.7)     | 0.009 |
| Statin                             | 1,577 (30.7) | 7,569 (29.5)  | 0.027 |
| ACEi, n (%)                        | 779 (15.2)   | 3,848 (15.0)  | 0.005 |
| ARB, n (%)                         | 451 (8.8)    | 2,196 (8.5)   | 0.008 |
| Beta blocker, n (%)                | 1137 (22.1)  | 5,998 (23.3)  | 0.029 |
| Loop diuretic, n (%)               | 529 (10.3)   | 2,664 (10.4)  | 0.002 |
| MRA, n (%)                         | 117 (2.3)    | 609 (2.4)     | 0.006 |
| <b>Virus testing method</b>        |              |               |       |
| Method                             |              |               | 0.029 |
| A, n (%)                           | 3,133 (61.0) | 15,399 (59.9) |       |
| B, n (%)                           | 725 (14.1)   | 3,861 (15.0)  |       |
| C, n (%)                           | 720 (14.0)   | 3,680 (14.3)  |       |
| D, n (%)                           | 560 (10.9)   | 2,750 (10.7)  |       |

---

Abbreviations. SMD: standardized mean difference, CAD: coronary heart disease, COPD: chronic obstructive pulmonary disease, DM: diabetes mellitus, ASA: acetyl-salicylic acid, ACEi: angiotensin-converting enzyme inhibitor, ARB: angiotensin II receptor blocker, MRA: mineralocorticoid receptor antagonist

**Table S32. Baseline characteristics for survival analysis of heart failure hospitalization stratified by influenza infection (matched, model-based heart failure history with cutoff 0.43)**

|                                    | influenza positive | influenza negative | SMD   |
|------------------------------------|--------------------|--------------------|-------|
| Number patients                    | 5138               | 25,690             |       |
| <b>Demographics</b>                |                    |                    |       |
| Age, years $\pm$ SD                | 55.2 $\pm$ 19.8    | 55.1 $\pm$ 19.6    | 0.003 |
| Gender, Male (%)                   | 1,867 (36.3)       | 9,342 (36.4)       | 0.001 |
| History of Smoking, Yes (%)        | 1,720 (33.5)       | 8,662 (33.7)       | 0.005 |
| Race                               |                    |                    | 0.022 |
| White, n (%)                       | 3,702 (72.1)       | 18,538 (72.2)      |       |
| Black, n (%)                       | 424 (8.3)          | 2,178 (8.5)        |       |
| Hispanic, n (%)                    | 169 (3.3)          | 849 (3.3)          |       |
| Asian, n (%)                       | 220 (4.3)          | 1,040 (4.0)        |       |
| Others, n (%)                      | 420 (8.2)          | 2,147 (8.4)        |       |
| Unknown, n (%)                     | 203 (4.0)          | 938 (3.7)          |       |
| <b>Disease history</b>             |                    |                    |       |
| Heart failure (model-based), n (%) | 401 (7.8)          | 2,049 (8.0)        | 0.006 |
| CAD, n (%)                         | 541 (10.5)         | 2,719 (10.6)       | 0.002 |
| COPD, n (%)                        | 639 (12.4)         | 3,253 (12.7)       | 0.007 |
| Hyperlipidemia, n (%)              | 2,035 (39.6)       | 10,015 (39.0)      | 0.013 |



|                                    |              |               |       |
|------------------------------------|--------------|---------------|-------|
| Hypertension, n (%)                | 2,179 (42.4) | 10,888 (42.4) | 0.001 |
| Atrial fibrillation, n (%)         | 460 (9.0)    | 2,338 (9.1)   | 0.005 |
| Type 2 DM, n (%)                   | 864 (16.8)   | 4,302 (16.7)  | 0.002 |
| <b>Medication</b>                  |              |               |       |
| ASA, n (%)                         | 1,326 (25.8) | 6,616 (25.8)  | 0.001 |
| P2Y <sub>12</sub> Inhibitor, n (%) | 145 (2.8)    | 707 (2.8)     | 0.004 |
| Statin                             | 1,577 (30.7) | 7,572 (29.5)  | 0.027 |
| ACEi, n (%)                        | 779 (15.2)   | 3,882 (15.1)  | 0.001 |
| ARB, n (%)                         | 451 (8.8)    | 2,205 (8.6)   | 0.007 |
| Beta blocker, n (%)                | 1137 (22.1)  | 6,151 (23.9)  | 0.043 |
| Loop diuretic, n (%)               | 529 (10.3)   | 2,704 (10.5)  | 0.008 |
| MRA, n (%)                         | 117 (2.3)    | 657 (2.6)     | 0.018 |
| <b>Virus testing method</b>        |              |               |       |
| Method                             |              |               | 0.032 |
| A, n (%)                           | 3,133 (61.0) | 15,449 (60.1) |       |
| B, n (%)                           | 725 (14.1)   | 3,834 (14.9)  |       |
| C, n (%)                           | 720 (14.0)   | 3,738 (14.6)  |       |
| D, n (%)                           | 560 (10.9)   | 2,669 (10.4)  |       |

---

Abbreviations. SMD: standardized mean difference, CAD: coronary heart disease, COPD: chronic obstructive pulmonary disease, DM: diabetes mellitus, ASA: acetyl-salicylic acid, ACEi: angiotensin-converting enzyme inhibitor, ARB: angiotensin II receptor blocker, MRA: mineralocorticoid receptor antagonist
